# Supplementary material for: Myeloid cell interferon responses correlate with clearance of SARS-CoV-2
Source: PubMed Central journal article supplement (PMC8814034; doi:10.1038/s41467-022-28315-7), 2022-02-03
Supplement: 41467_2022_28315_MOESM1_ESM.pdf [file 41467_2022_28315_MOESM1_ESM.pdf]

## Myeloid cell interferon responses correlate with clearance of SARS-CoV-2

Dhiraj K. Singh<sup>\*1</sup>, Ekaterina Aladyeva<sup>\*2</sup>, Shibali Das<sup>\*3</sup>, Bindu Singh<sup>1</sup>, Ekaterina Esaulova<sup>2</sup>, Amanda Swain<sup>2</sup>, Mushtaq Ahmed<sup>3</sup>, Journey Cole<sup>1</sup>, Chivonne Moodley<sup>1,4</sup>, Smriti Mehra<sup>1</sup>, Larry S. Schlesinger<sup>1</sup>, Maxim N. Artyomov<sup>2\*\*</sup>, Shabaana A. Khader<sup>3\*\*</sup> and Deepak Kaushal<sup>1\*\*</sup>

<sup>1</sup>Southwest National Primate Research Center, Texas Biomedical Research Institute, San Antonio, TX 78245.

<sup>2</sup>Department of Medicine, Washington University in St. Louis, St. Louis, MO 63110.

<sup>3</sup>Department of Molecular Microbiology, Washington University in St. Louis, St. Louis, MO 63110.

<sup>4</sup>Tulane National Primate Research Center, Tulane University School of Medicine, Covington, LA 70433.

\* These authors contributed equally

\*\* These authors jointly supervised this work

**Corresponding authors:** Deepak Kaushal, Southwest National Primate Research Center, Texas Biomedical Research Institute, San Antonio, TX 78245, [dkaushal@txbiomed.org](mailto:dkaushal@txbiomed.org); Shabaana A. Khader, Department of Molecular Microbiology, Washington University in St. Louis, St. Louis, MO 63110, [sakhader@wustl.edu](mailto:sakhader@wustl.edu); and Maxim N. Artyomov, PhD, Department of Pathology and Immunology, Washington University School of Medicine, St. Louis, MO 63110, [martyomov@wustl.edu](mailto:martyomov@wustl.edu).

### Supplementary Information

### Supplementary Figure 1

Log2(nUMI)

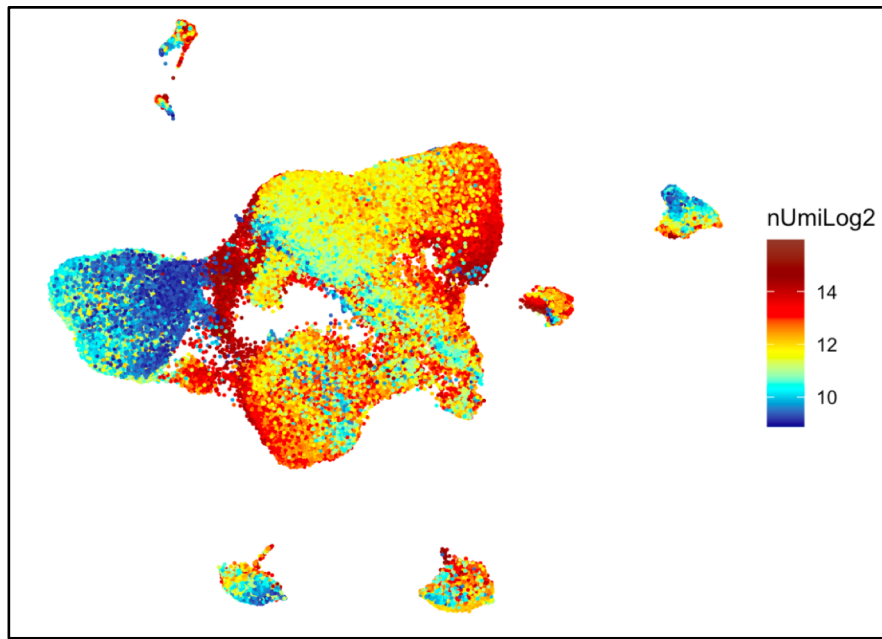

Log2(nGenes)

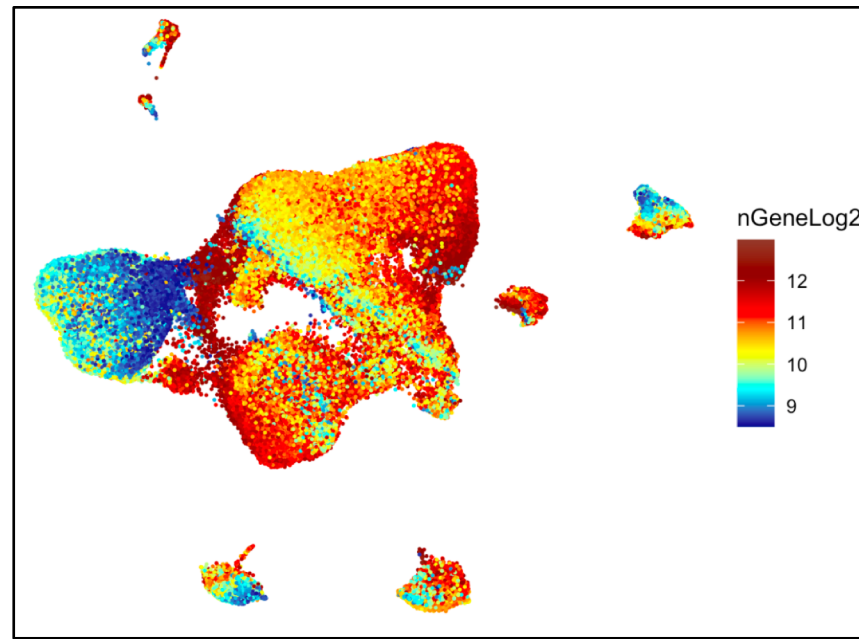

% of MT genes

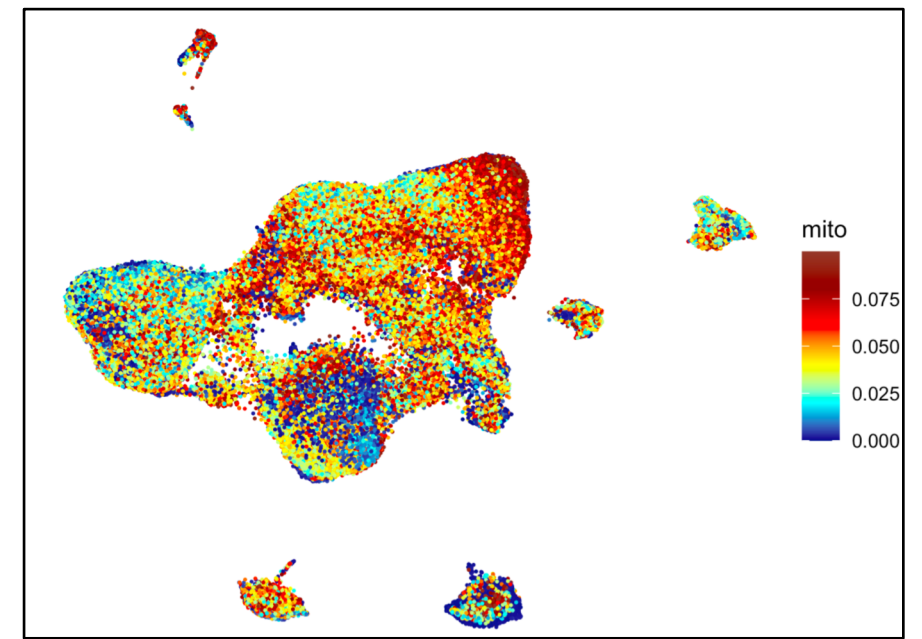

**Supplementary Figure 1.** UMAP plots representing QC parameters for analysis. (A) nUMI, (B) nGenes and (C) fraction of mitochondrial genes.

## Supplementary Figure 2

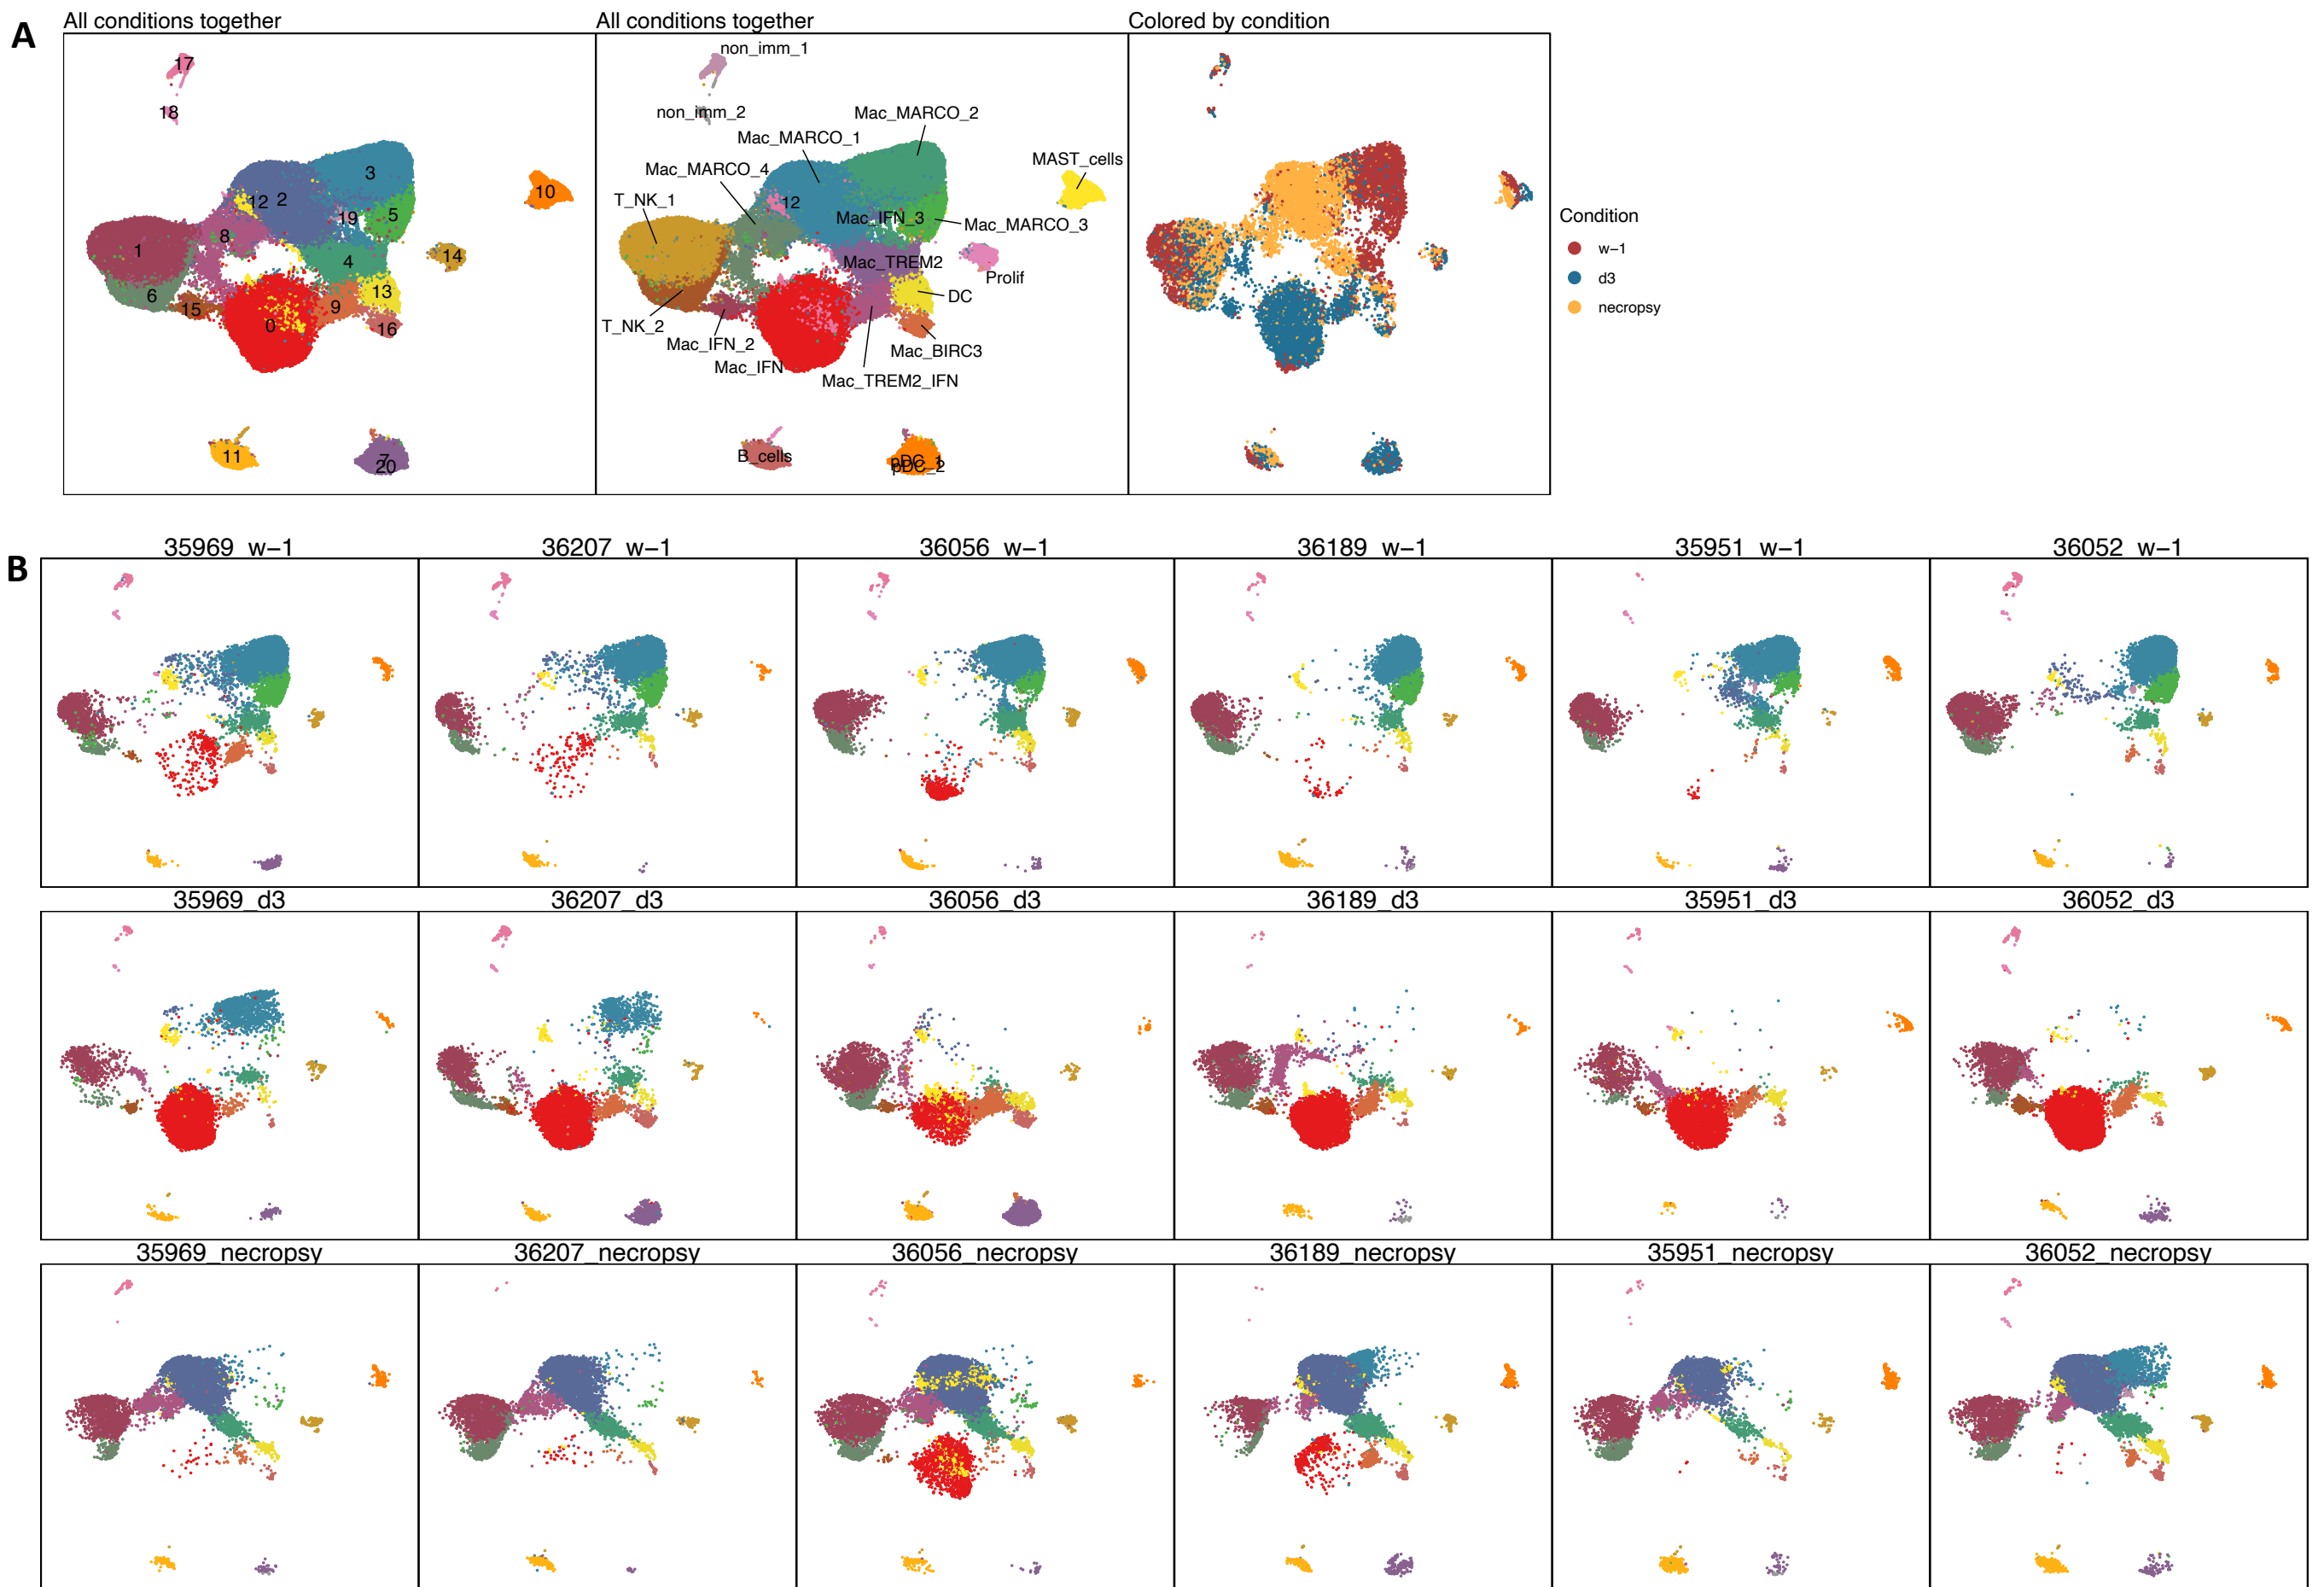

**Supplementary Figure 2.** (A) UMAP plots depicting all clusters (left), cluster annotations (middle), distribution as per condition (right) and (B) distribution per sample.

### Supplementary Figure 3

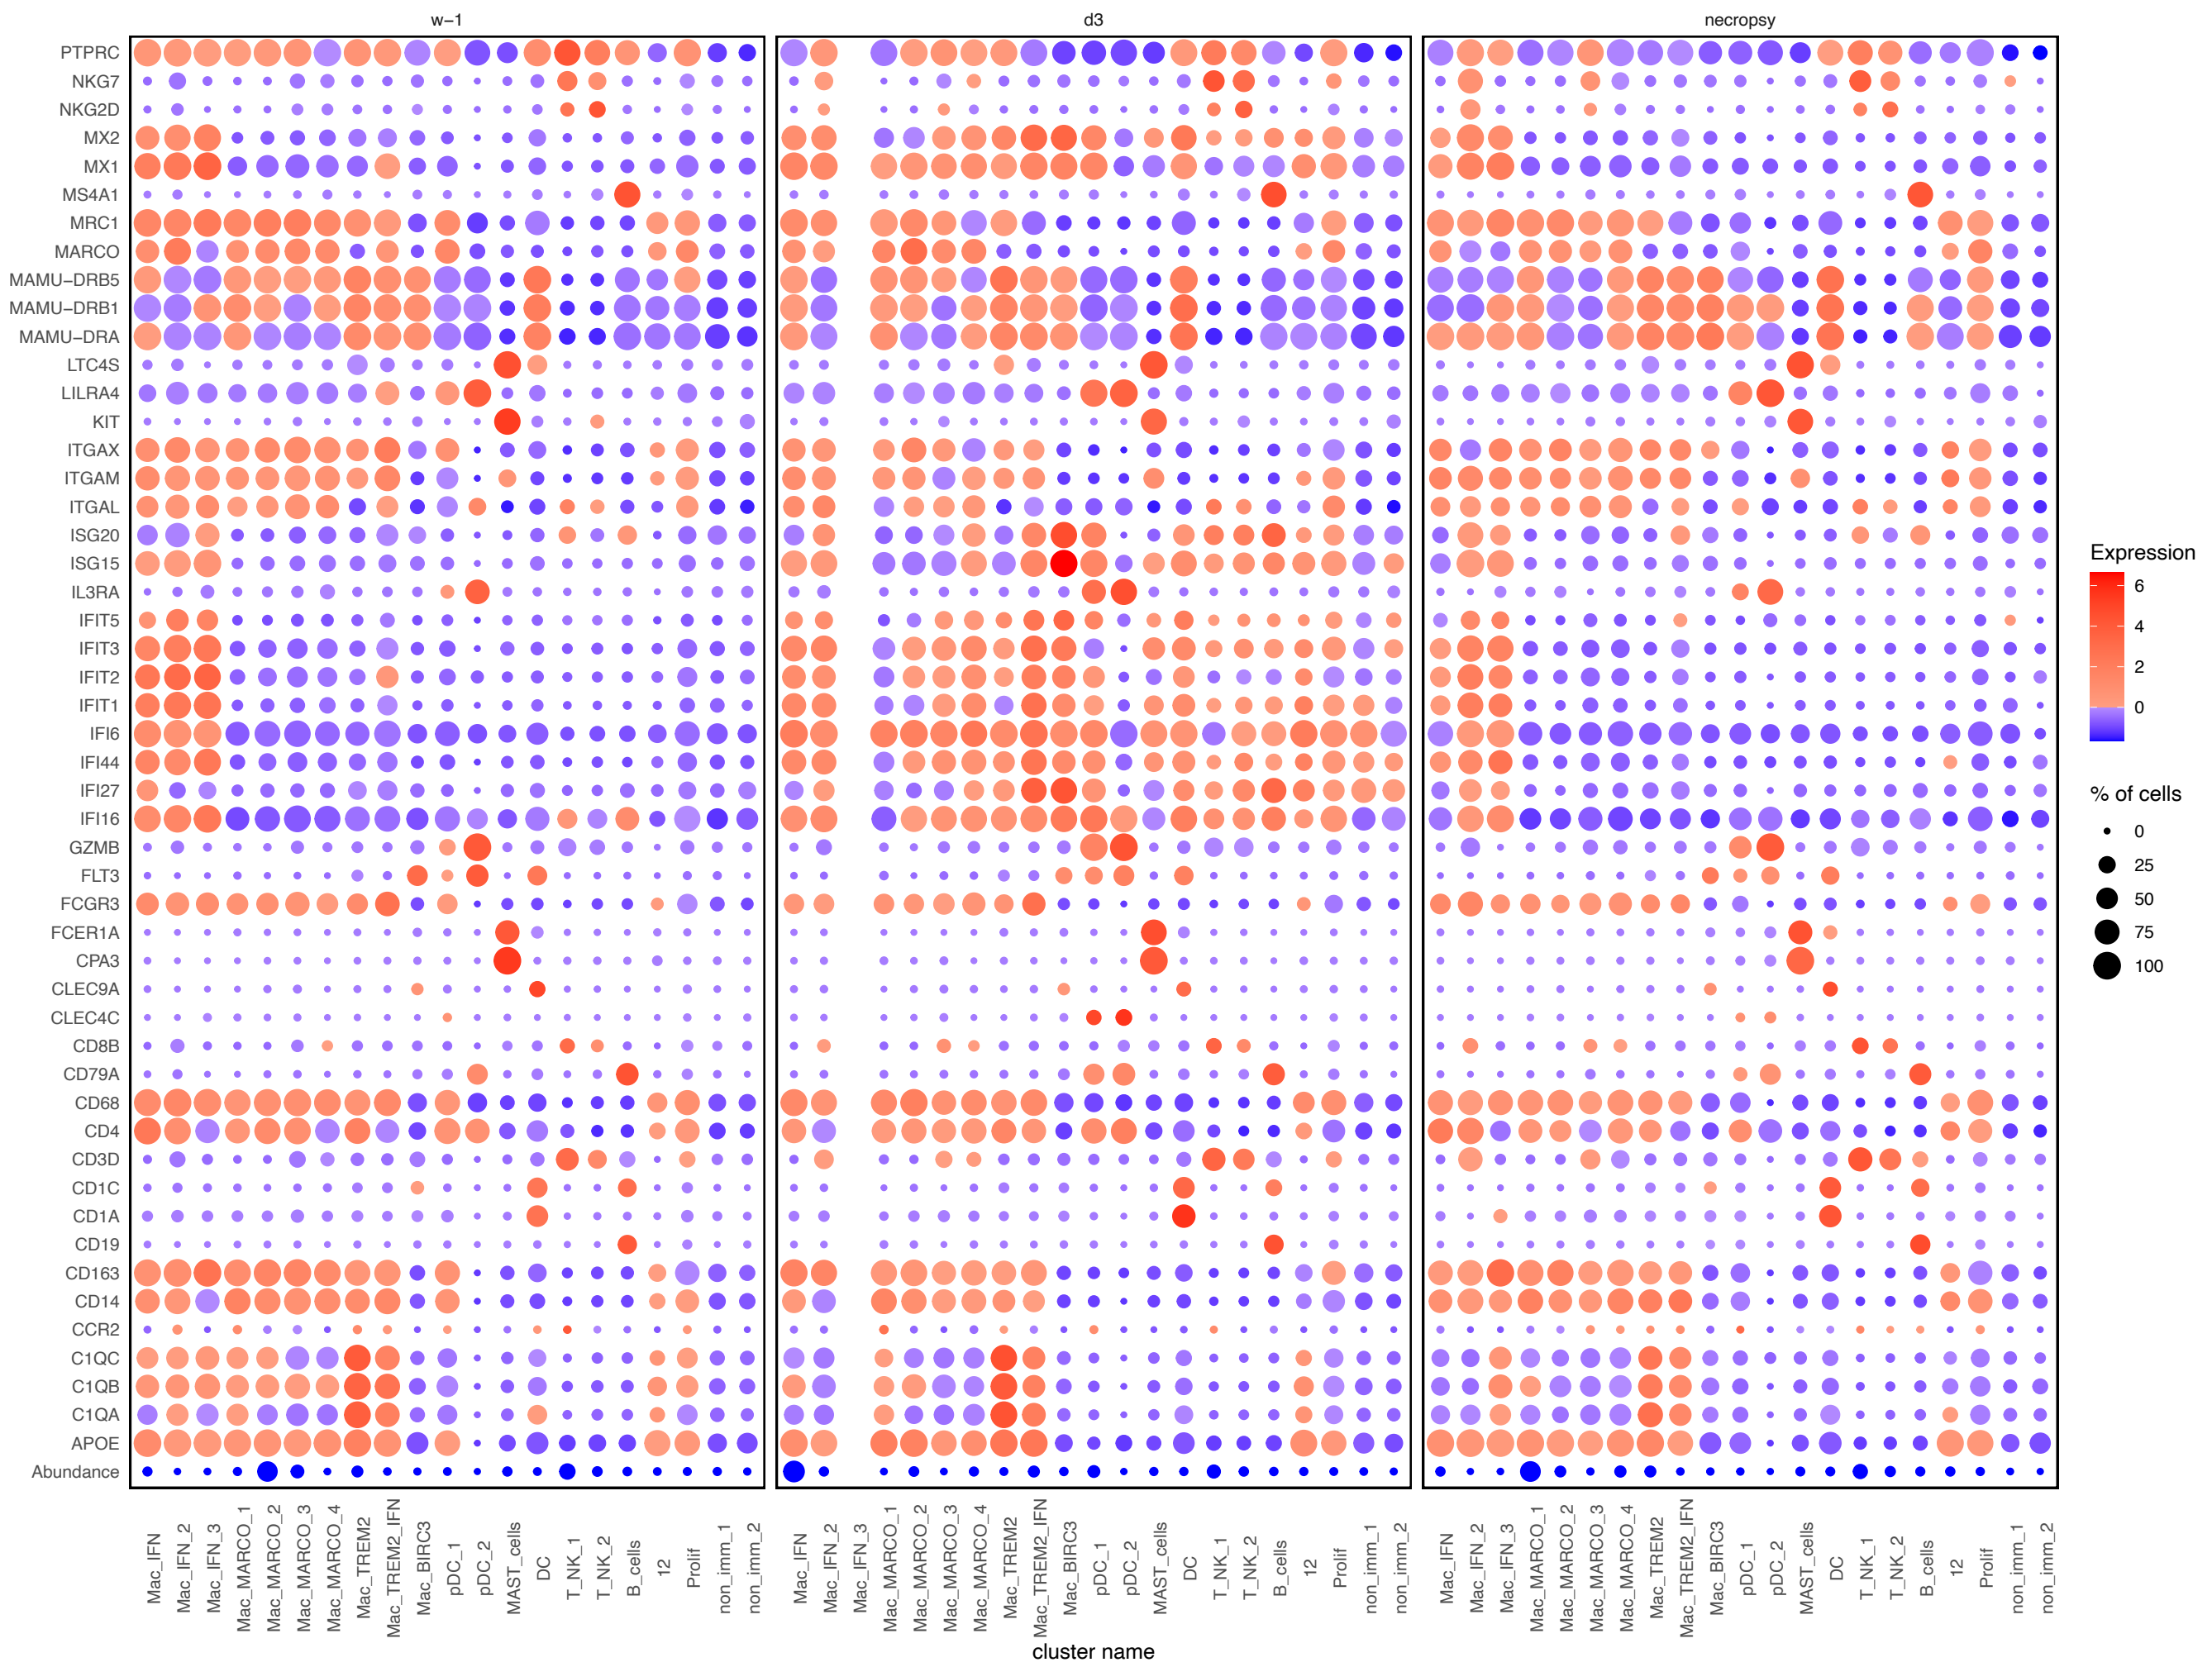

**Supplementary Figure 3.** Bubble plot showing the fractional abundance of identified clusters (bottom row), fold change of genes and the fraction of cells expressing the gene of interest in different phases of COVID-19.

### Supplementary Figure 4

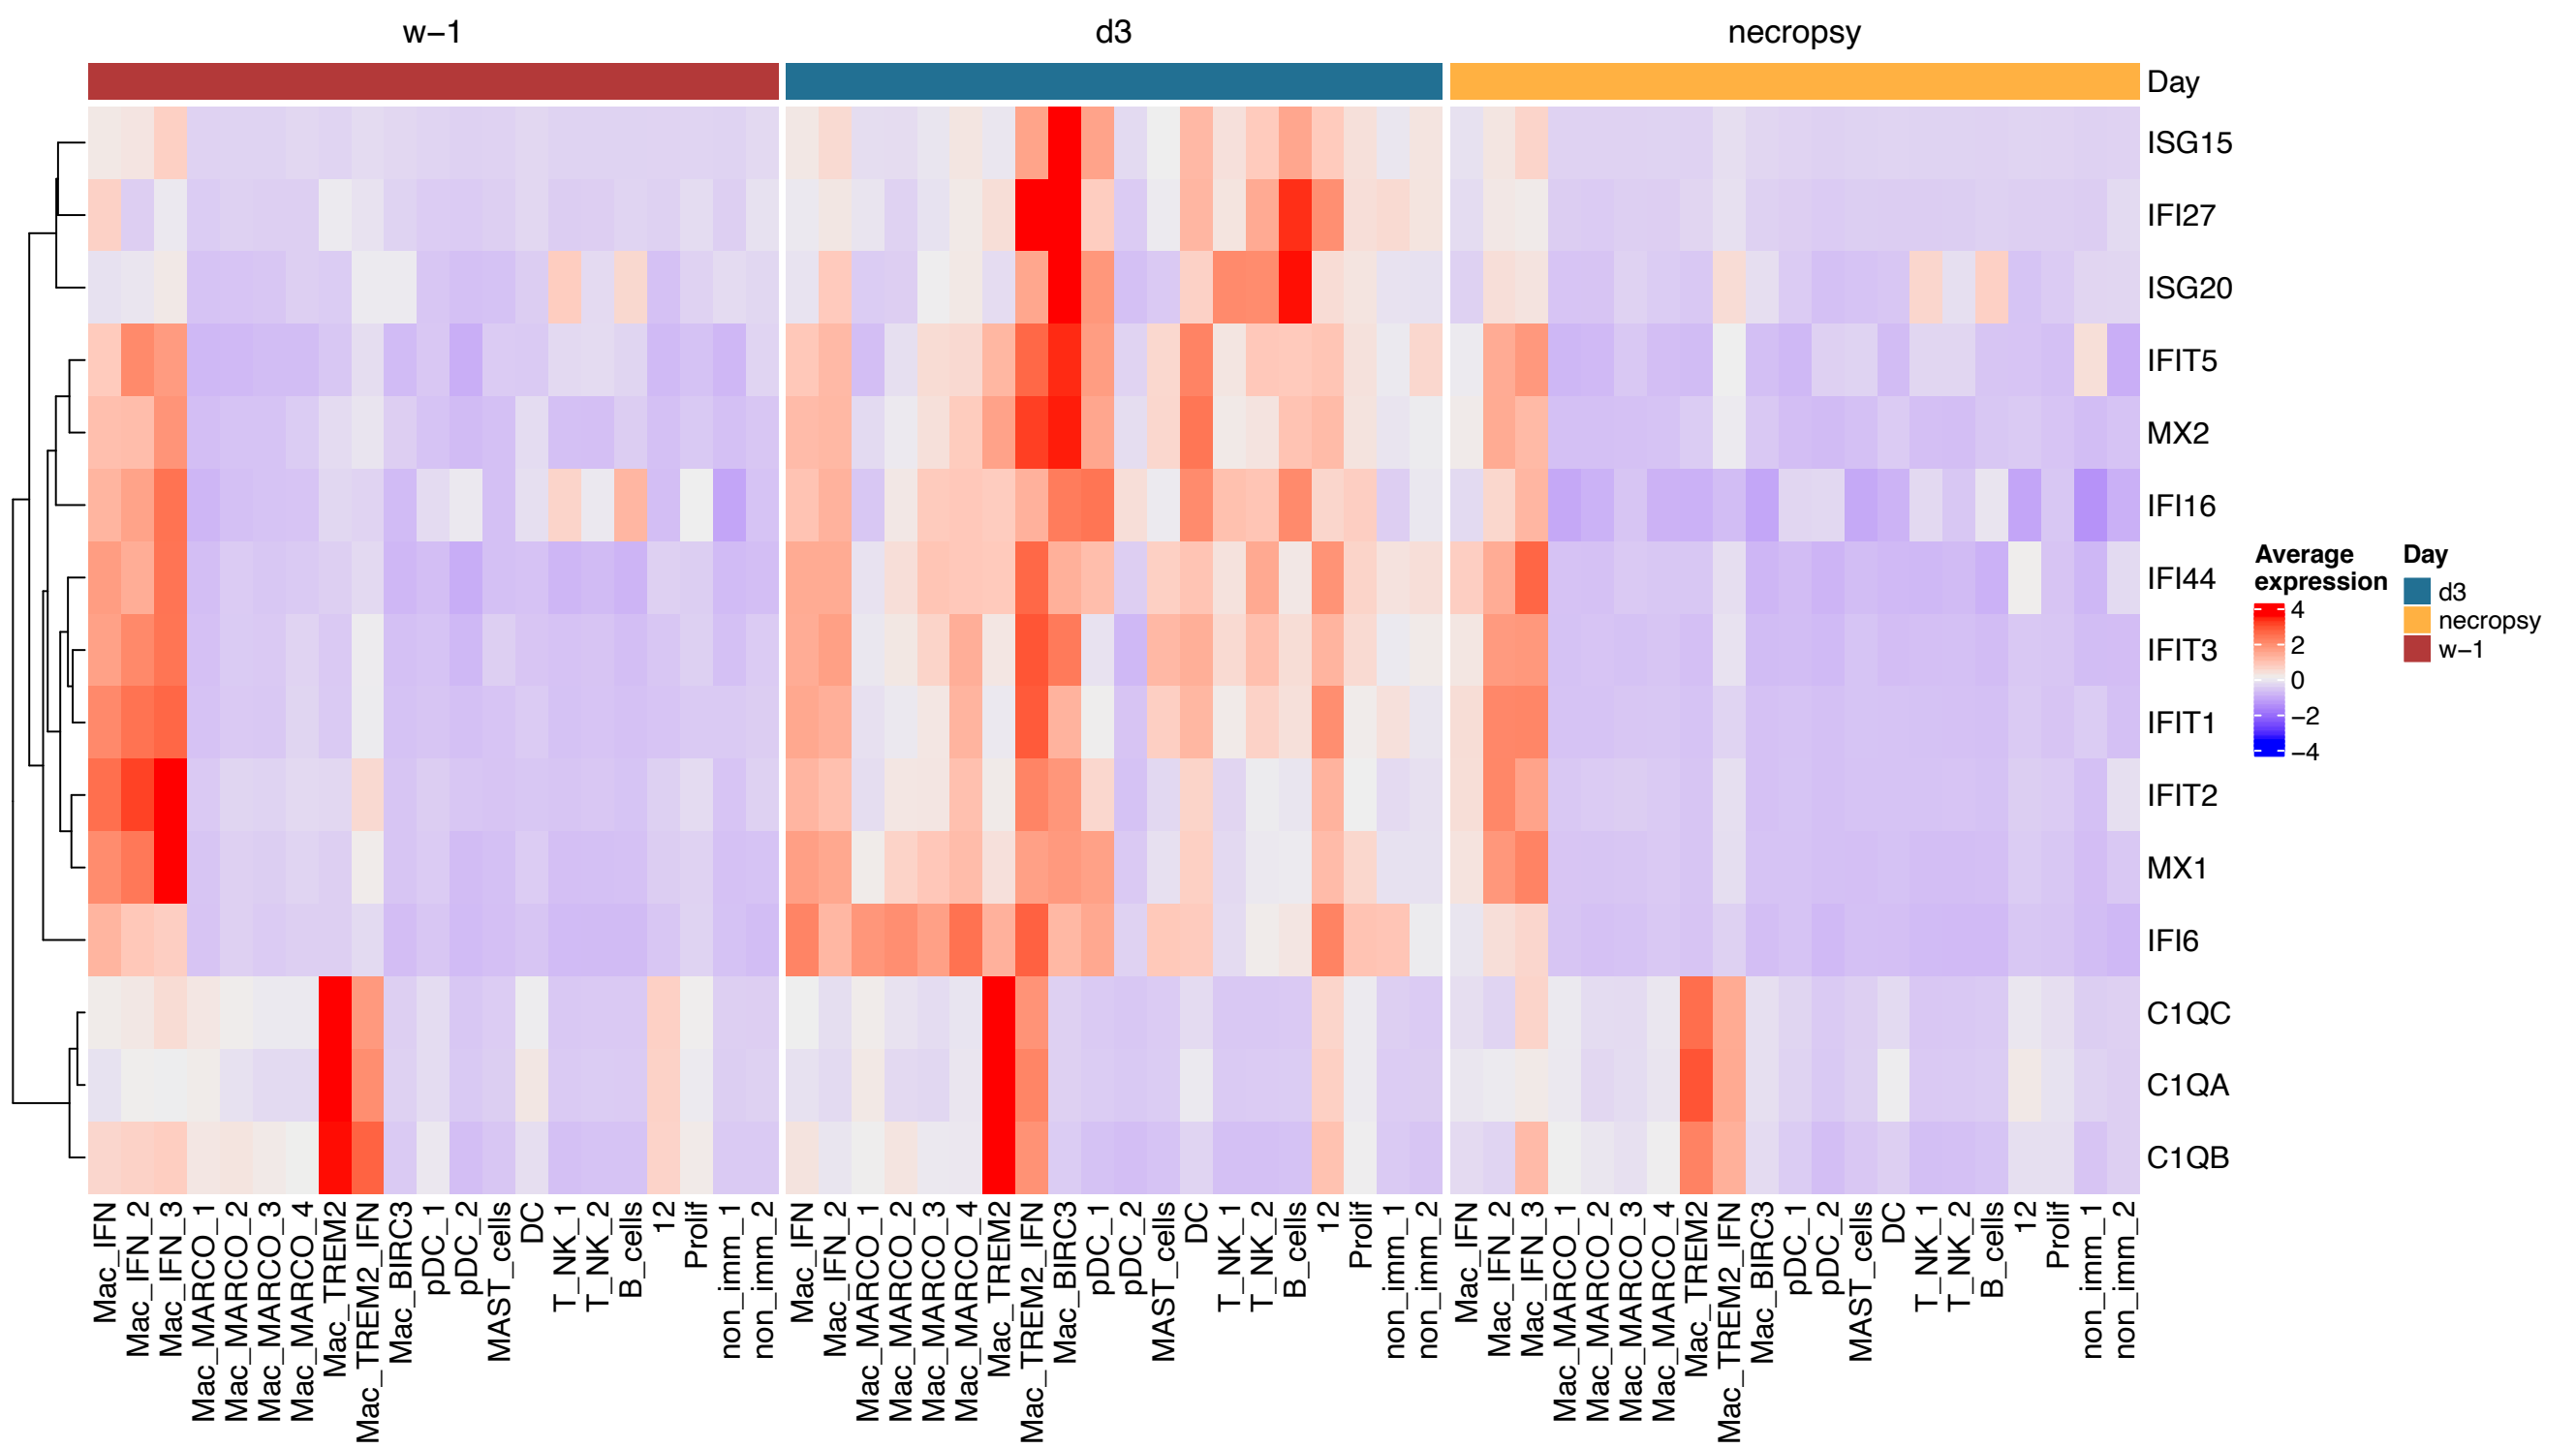

**Supplementary Figure 4.** Heatmap representing differential expression of genes of interest in identified clusters in different phases of COVID-19.

## Supplementary Figure 5

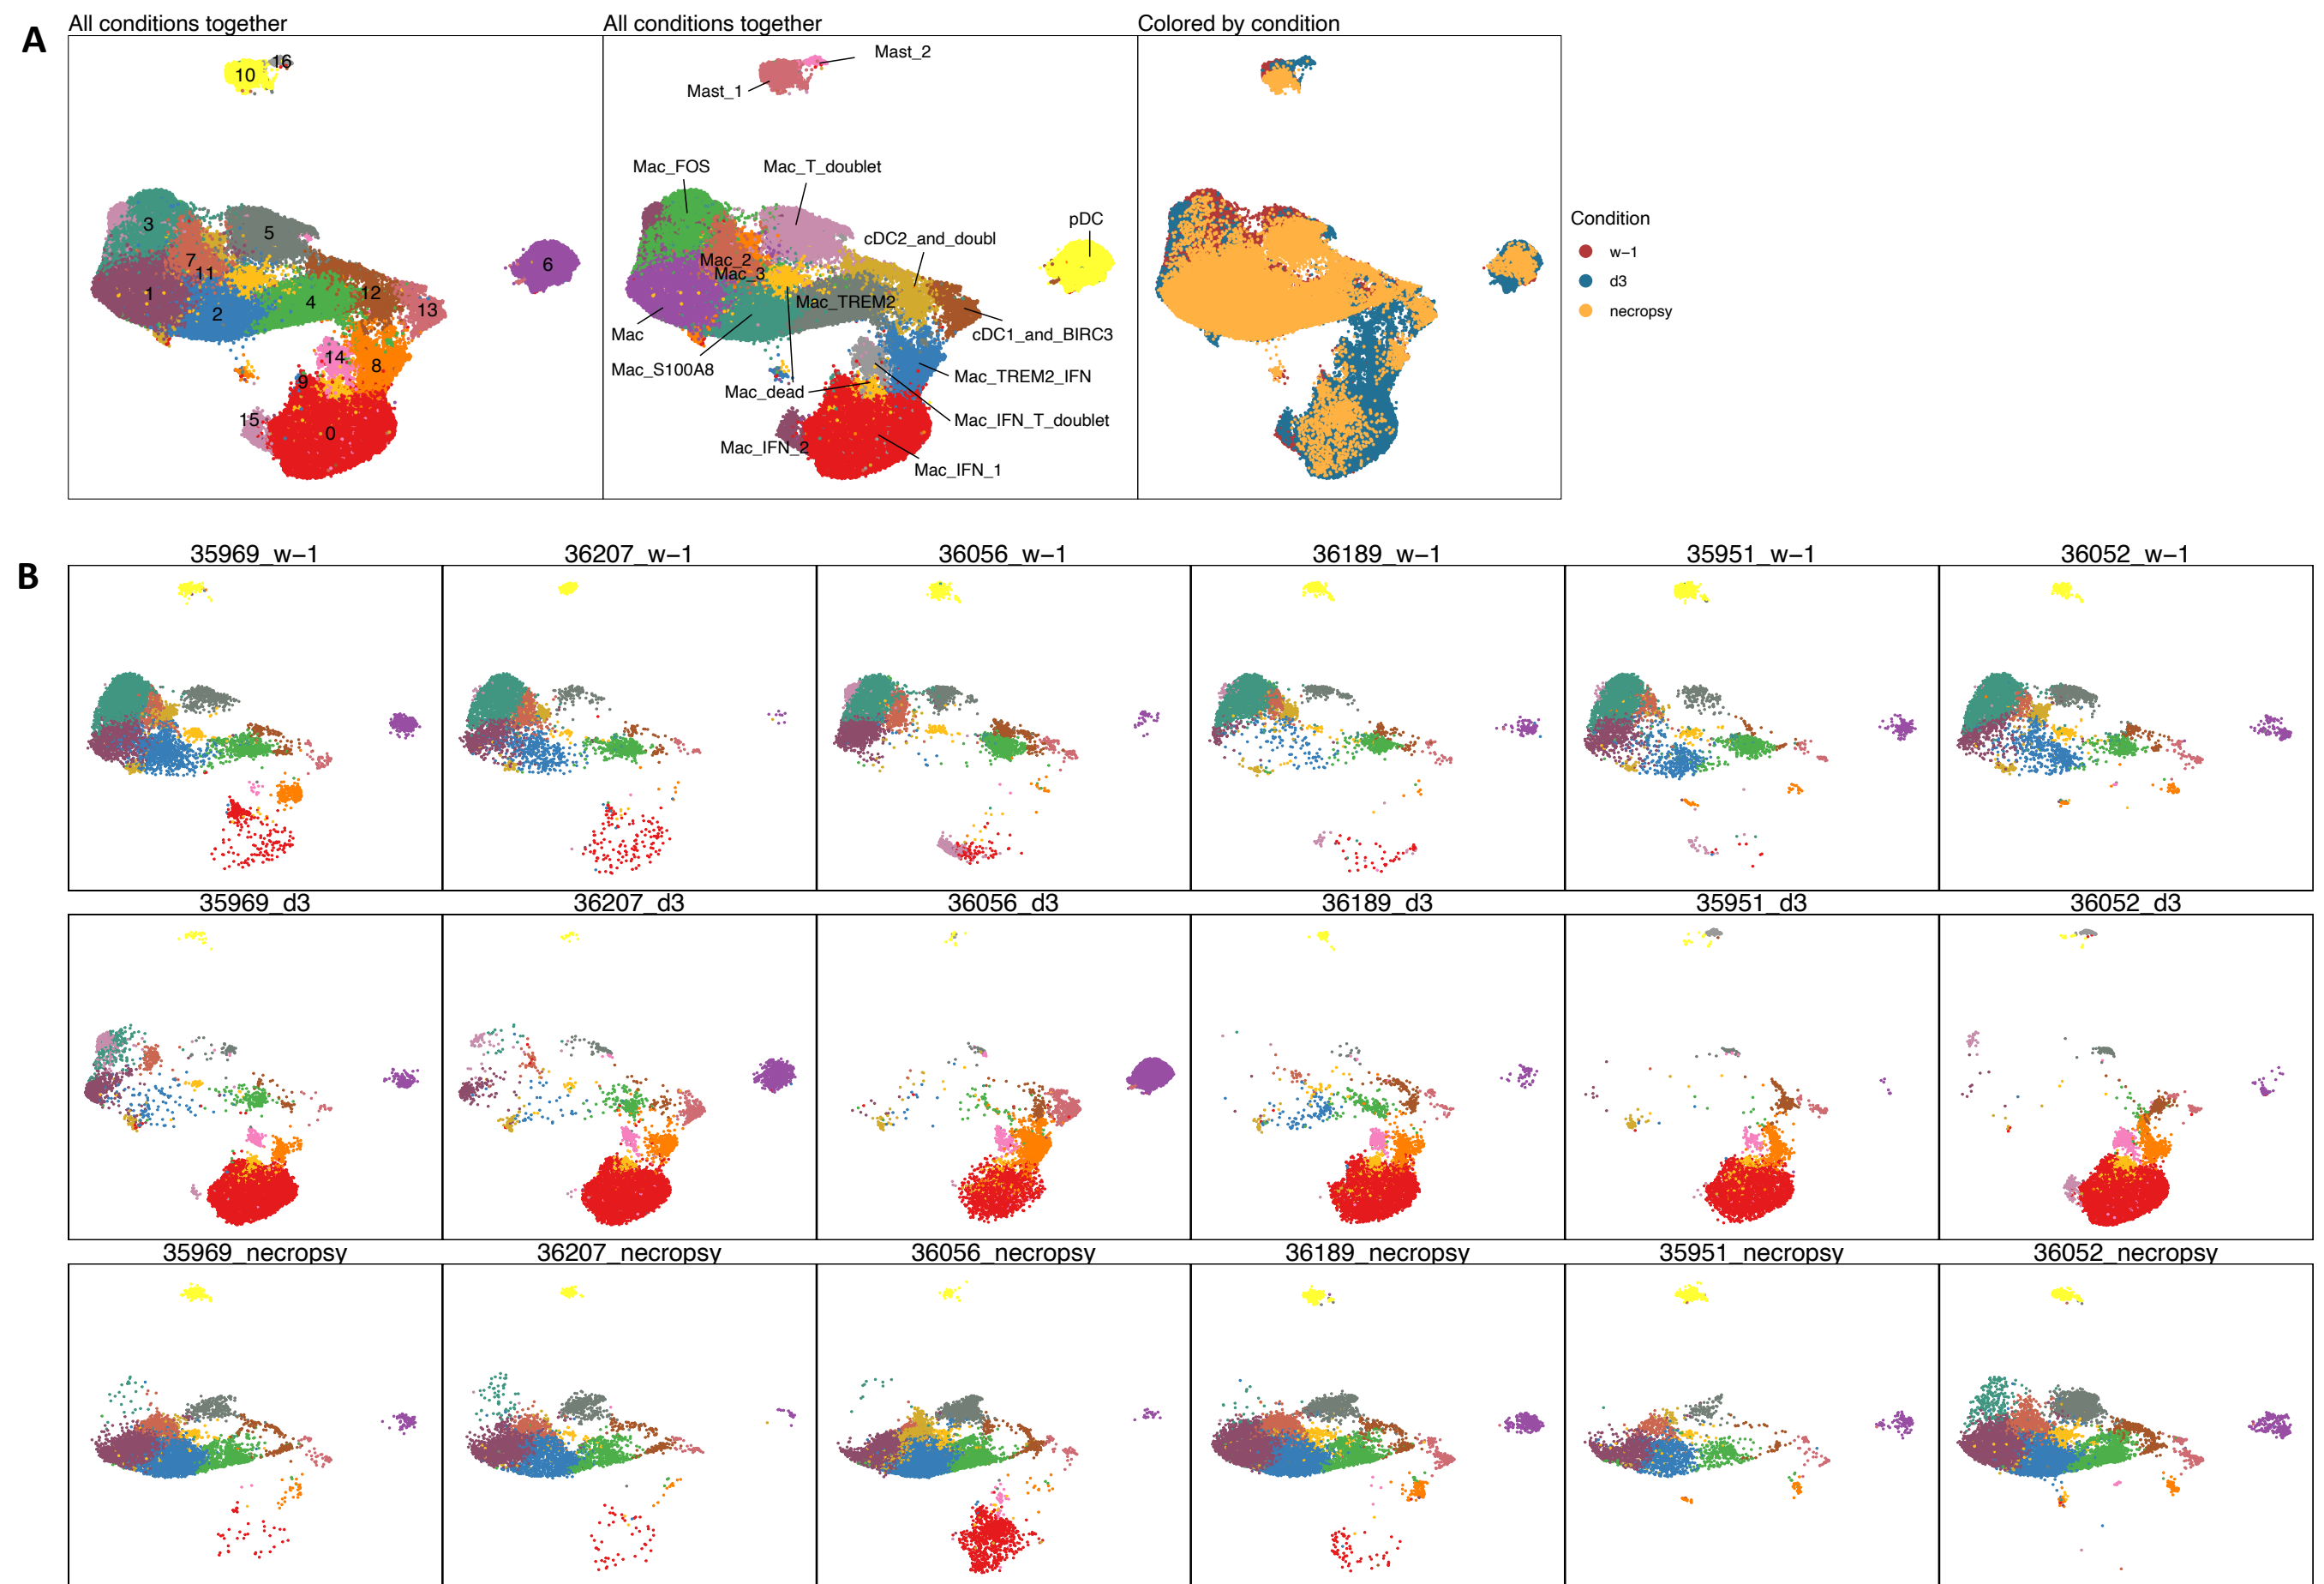

**Supplementary Figure 5.** (A) UMAP plots depicting all myeloid clusters (left), cluster annotations (middle), distribution as per condition (right) and (B) distribution per sample.

## Supplementary Figure 6

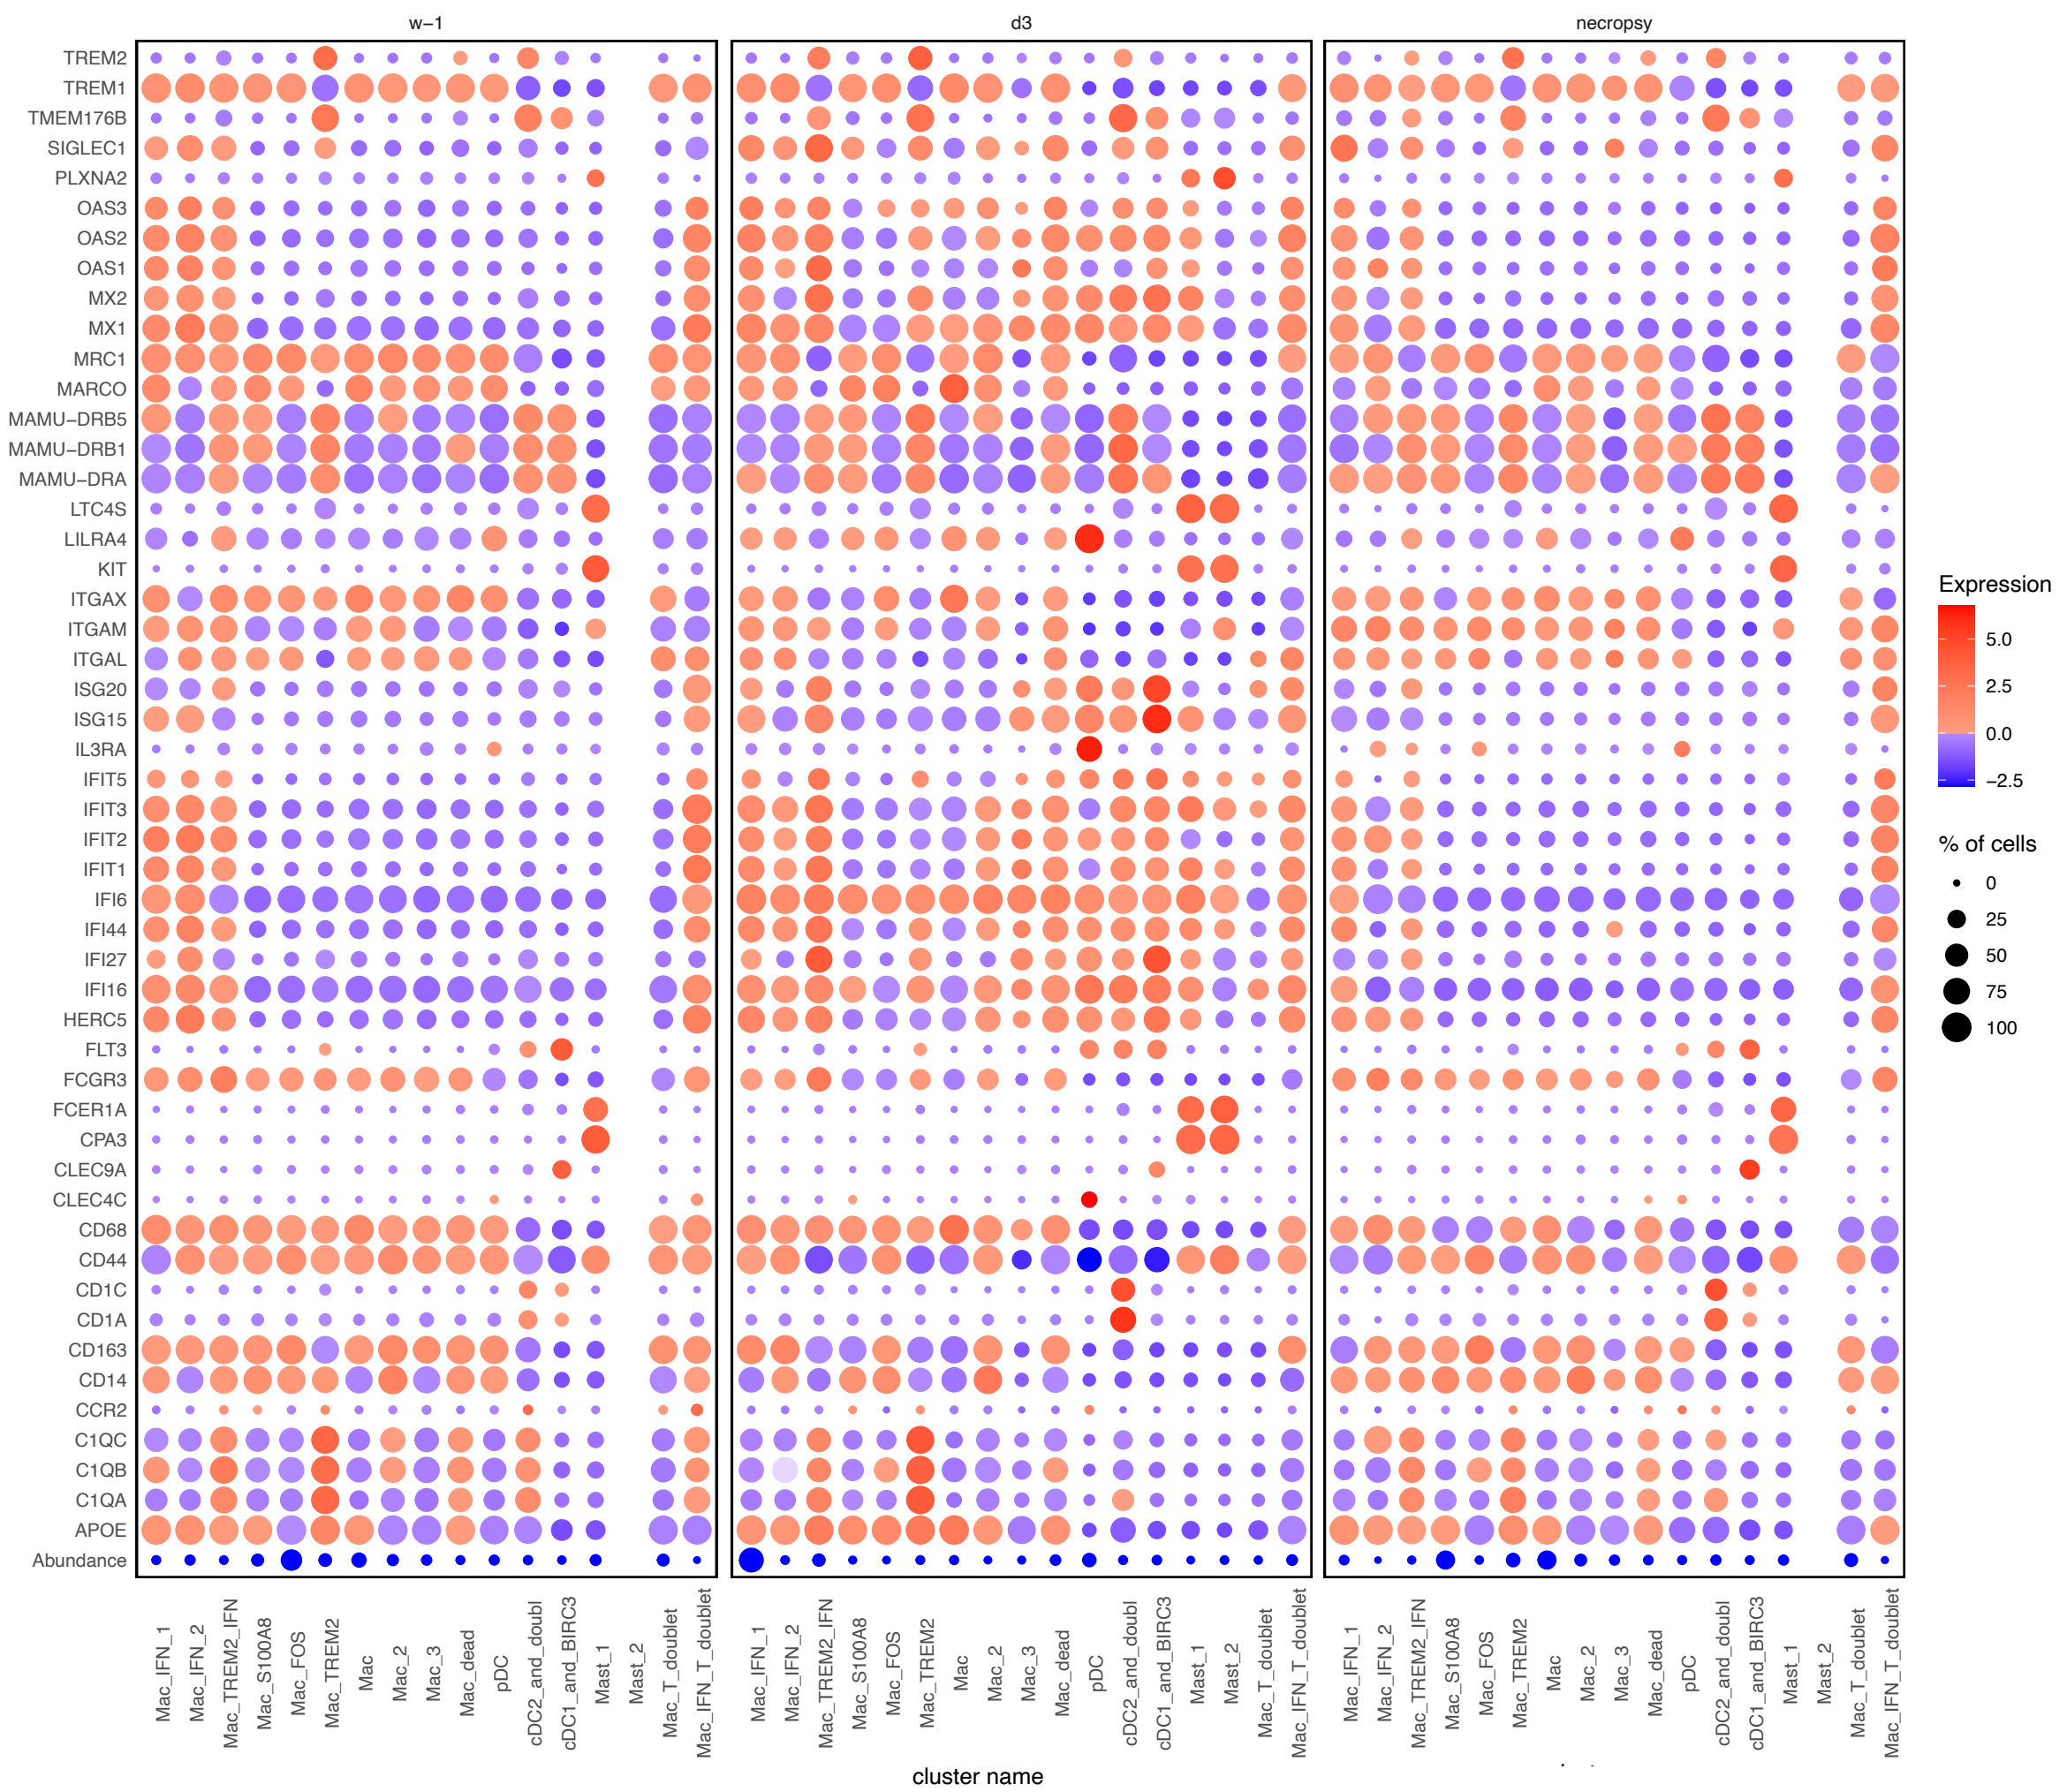

**Supplementary Figure 6.** Bubble plot showing the fractional abundance of identified myeloid clusters (bottom row), fold change of genes and the fraction of cells expressing the gene of interest in different phases of COVID-19.

### Supplementary Figure 7

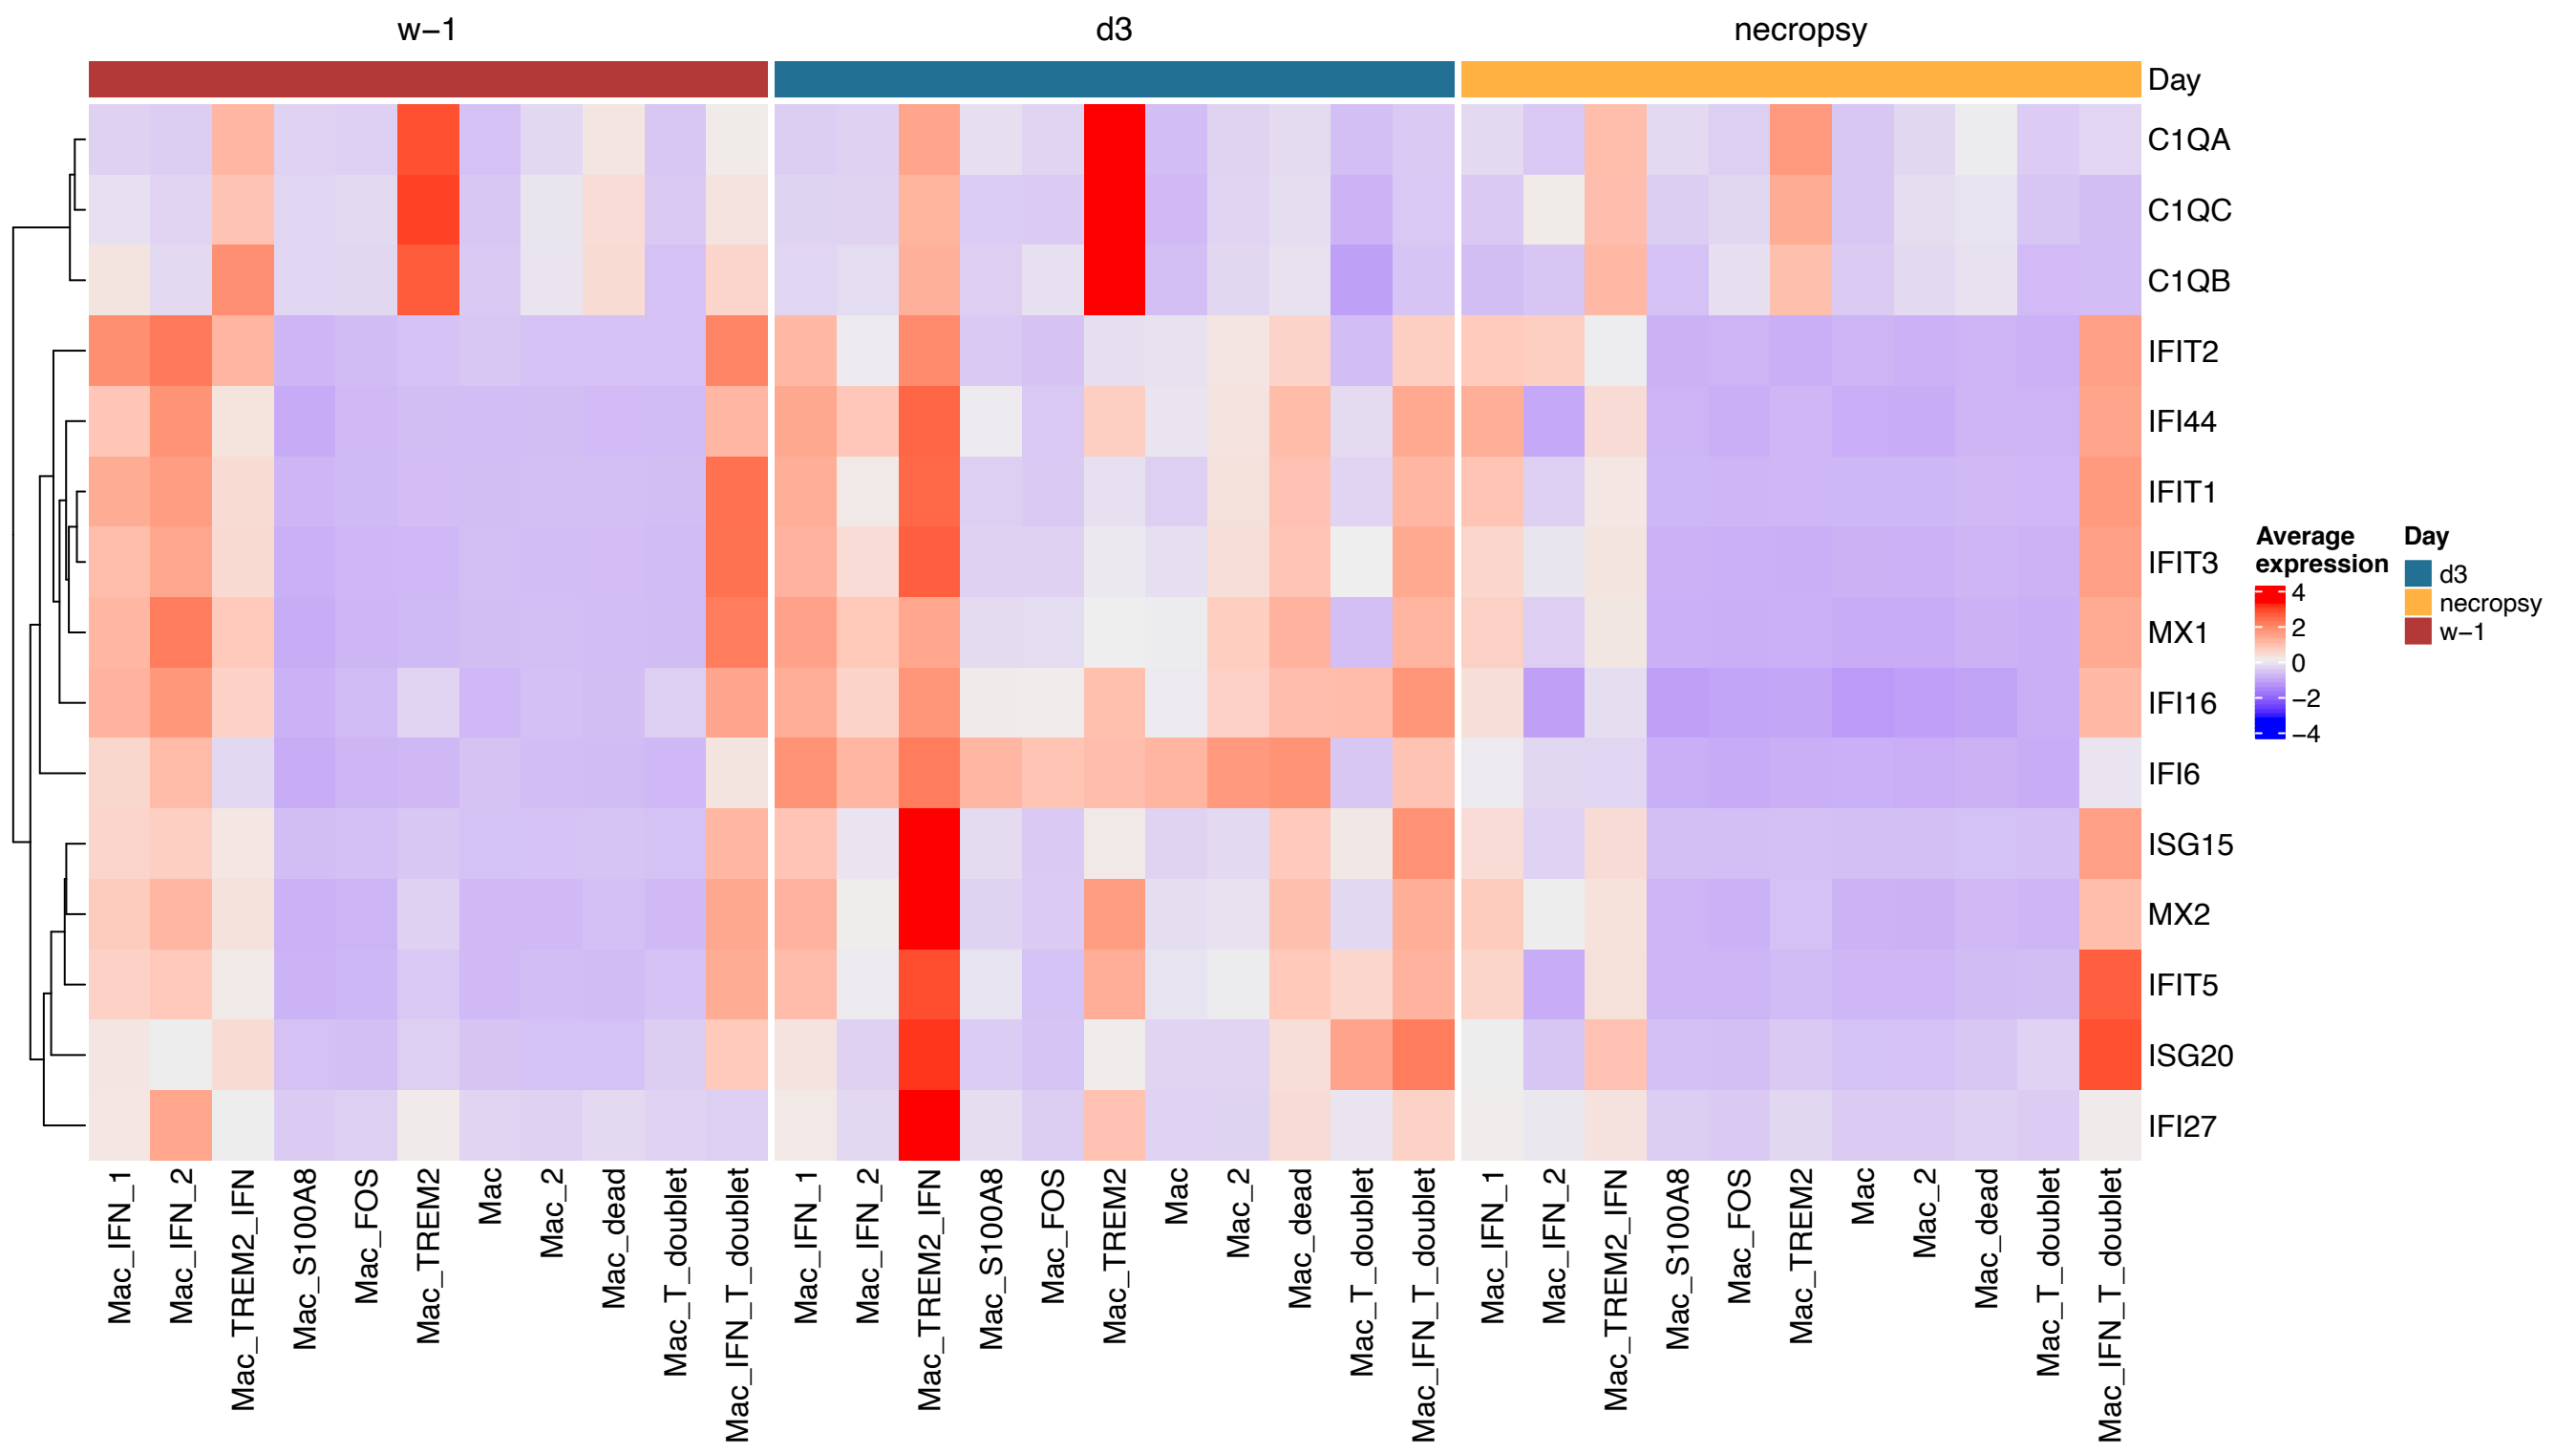

**Supplementary Figure 7.** Heatmap representing differential expression of genes of interest in identified myeloid clusters in different phases of COVID-19.



### Supplementary Figure 8

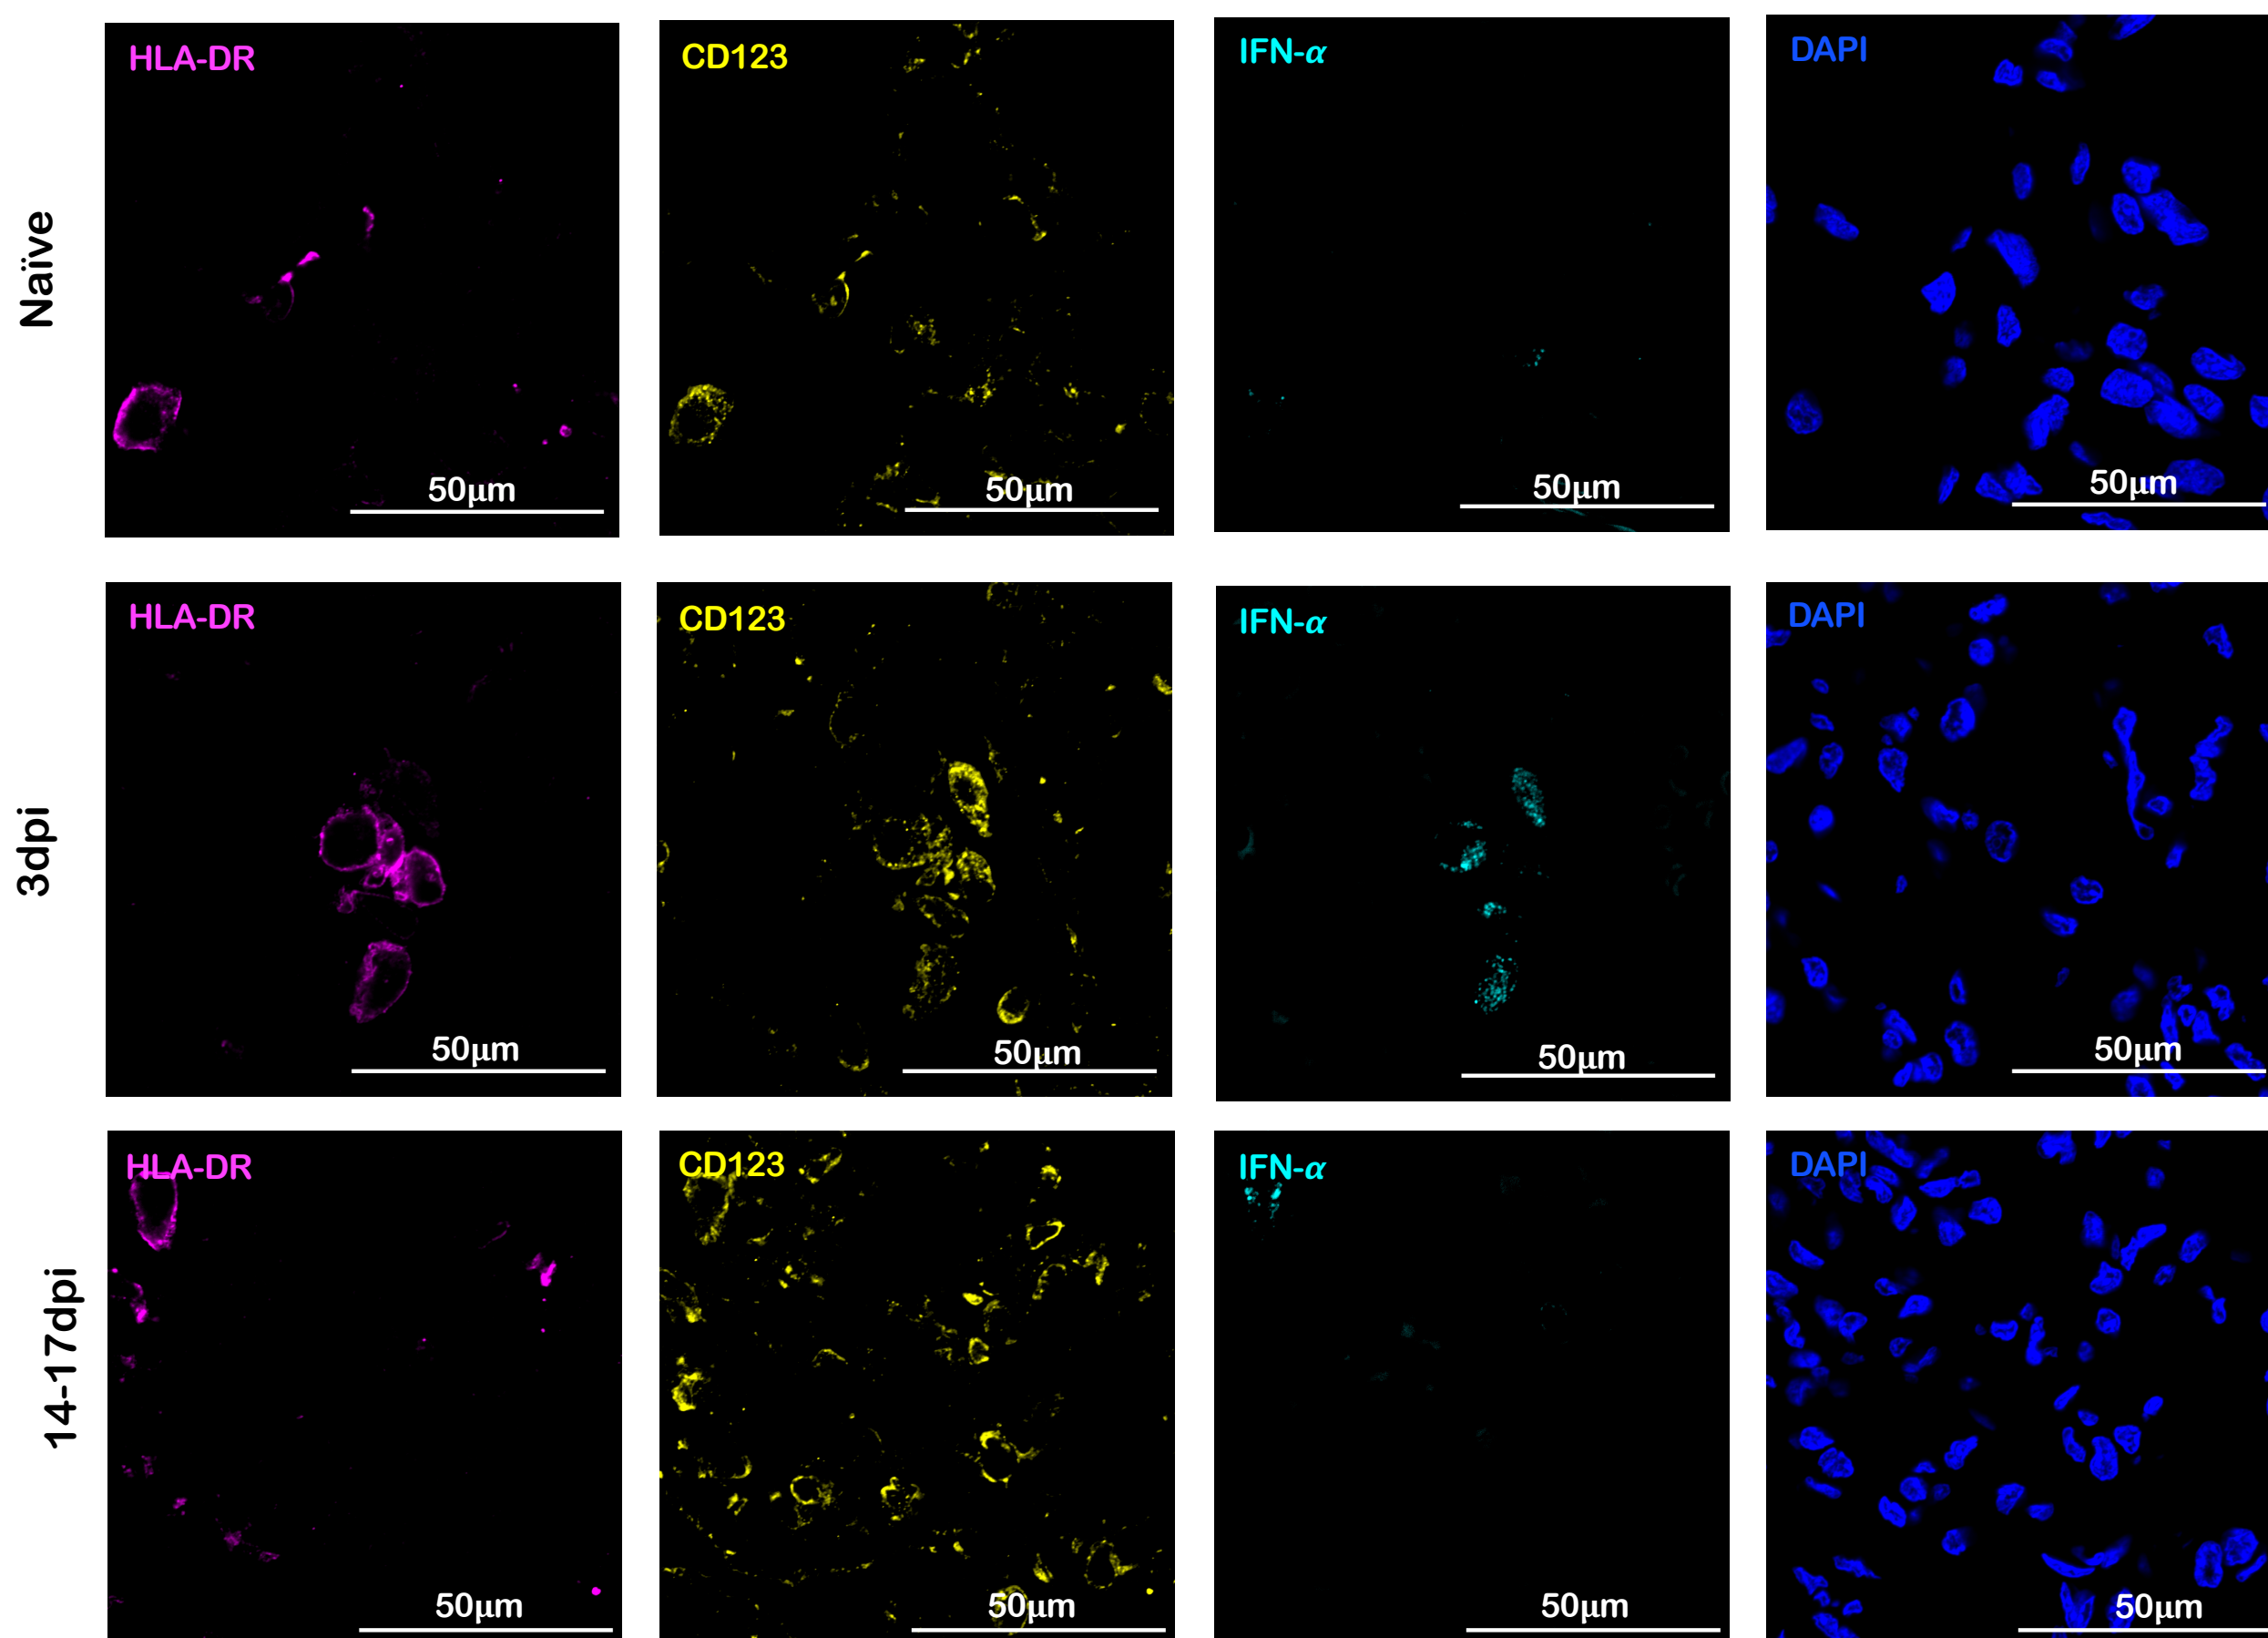

**Supplementary Figure 8.** Single channel images depicting pDCs marked with HLA-DR (magenta) and CD123 (yellow) showing expression of IFN- $\alpha$  (turquoise) in Naïve lungs as well as SARS CoV-2 infected lungs at Day 3 and Day 14 post-infection at 63x magnification. Nuclei stained with DAPI are shown in blue.

## Supplementary Figure 9

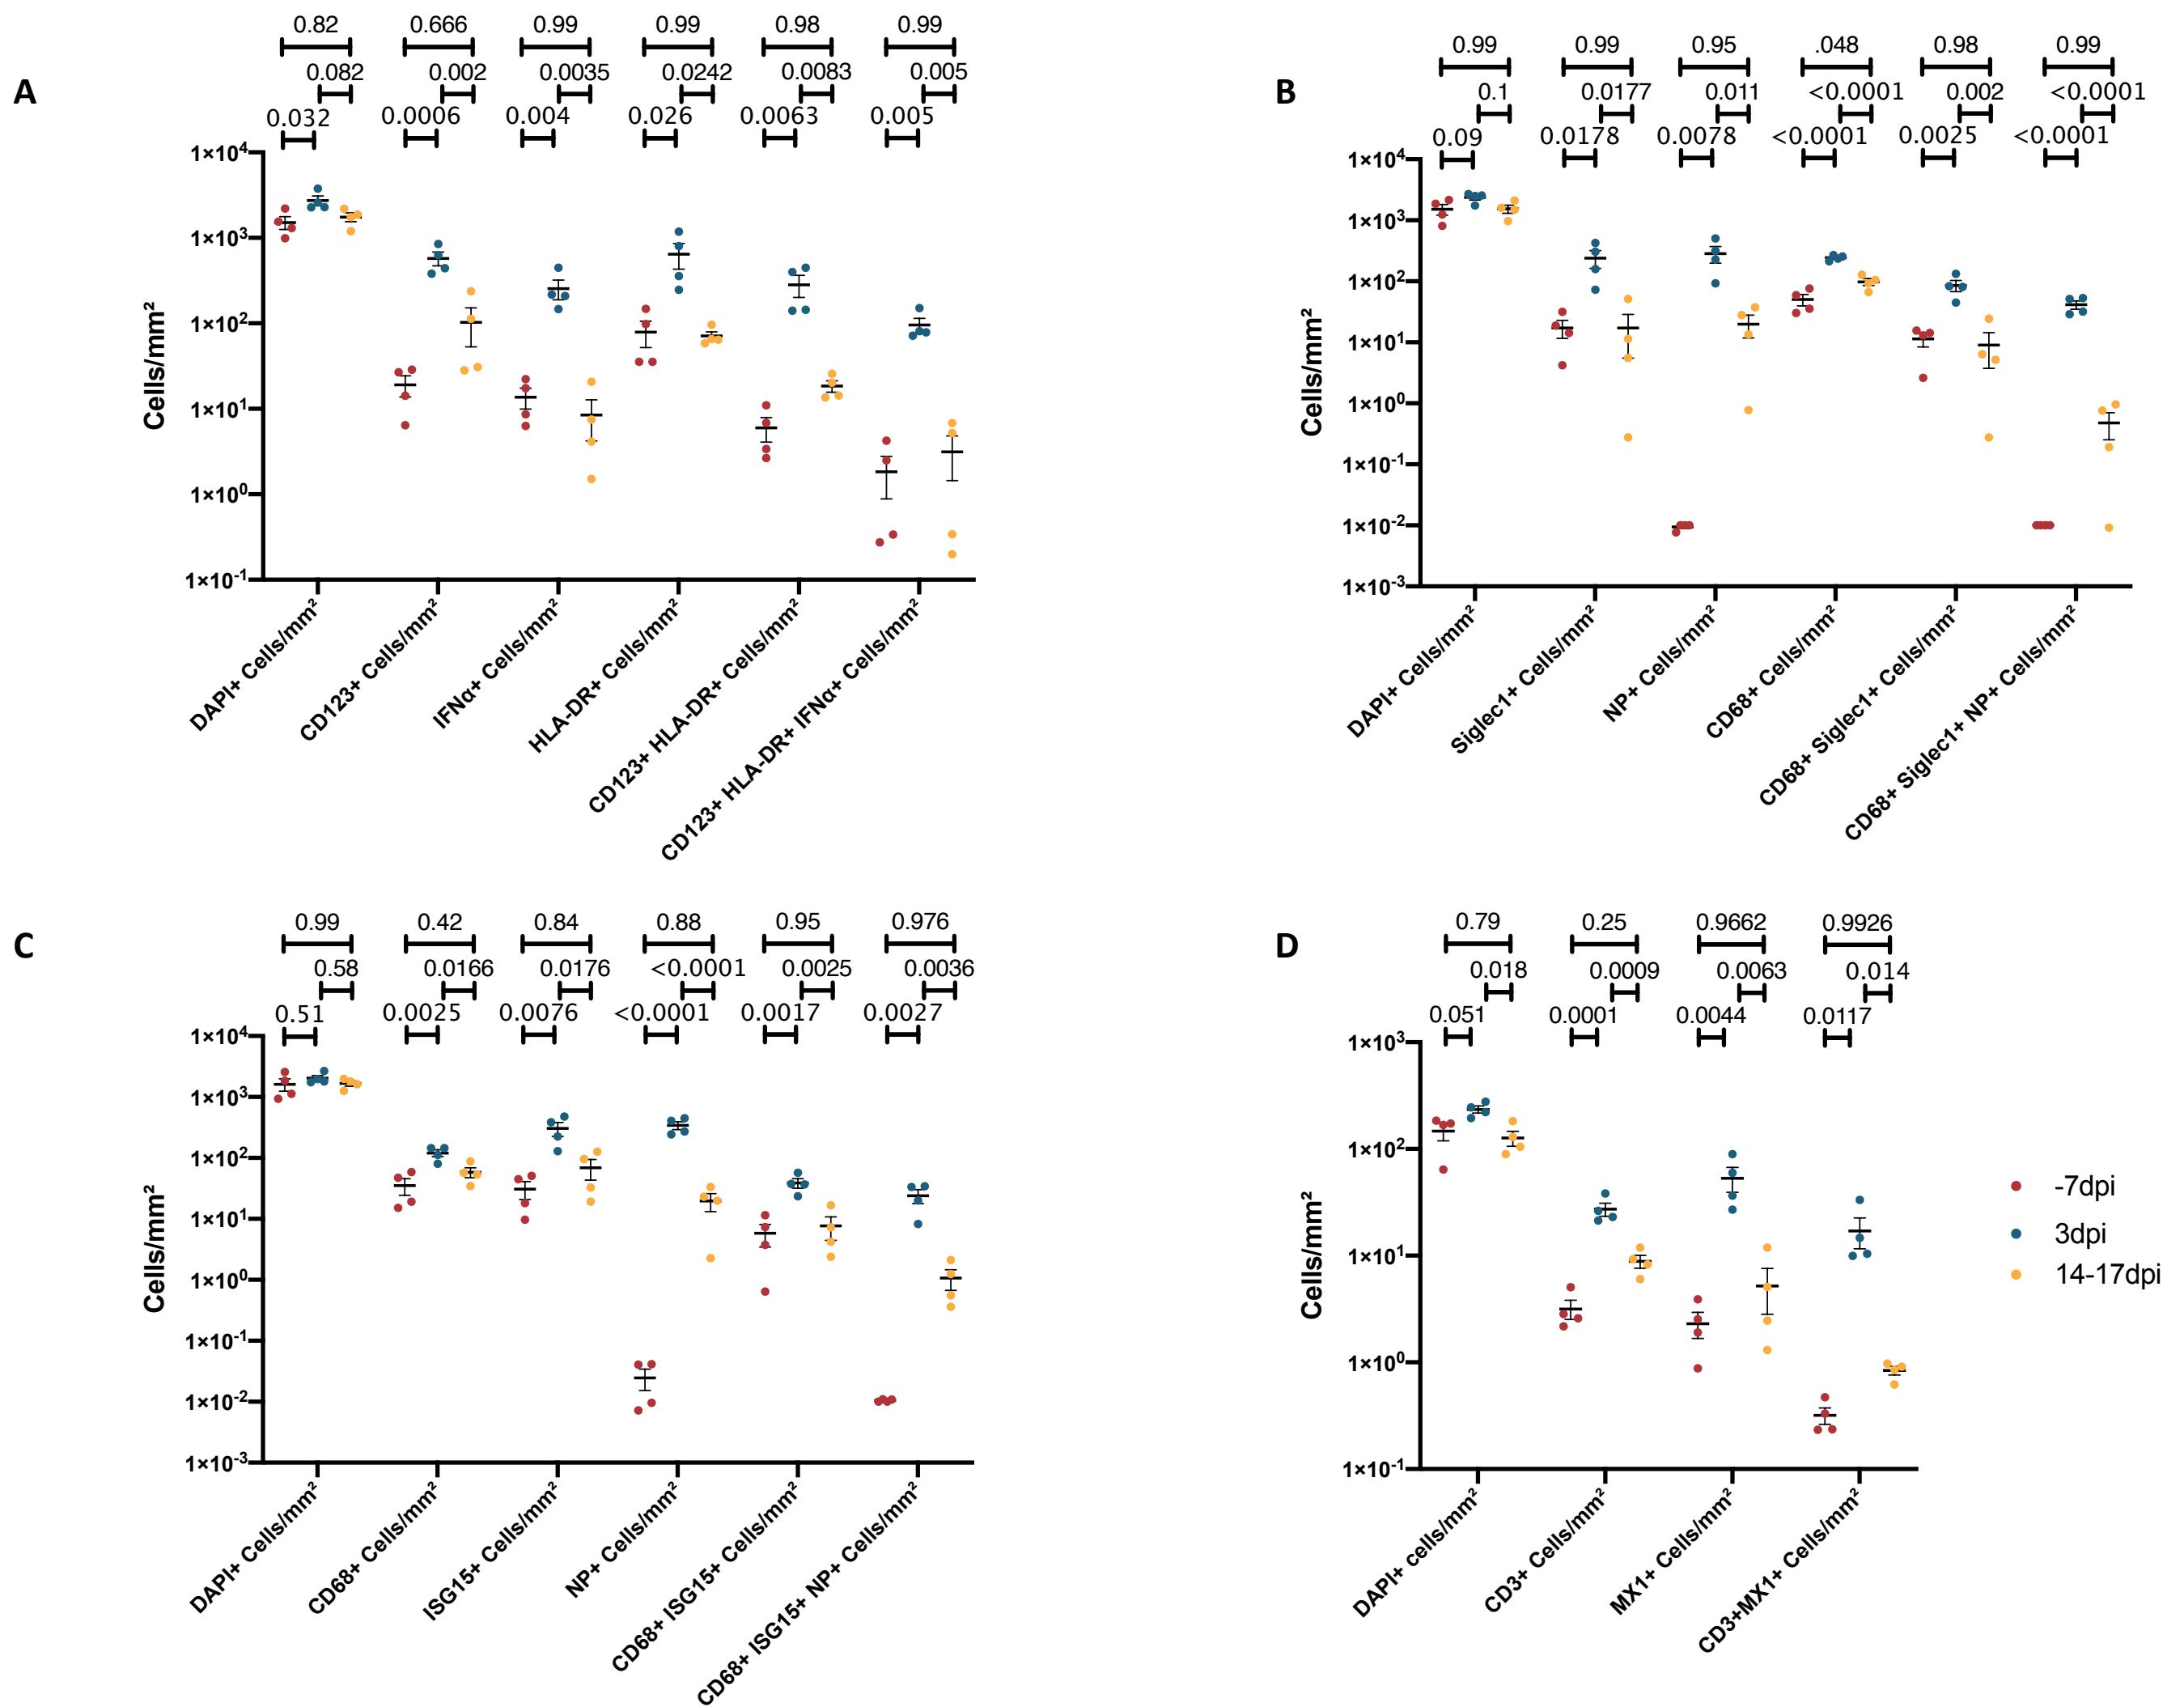

**Supplementary Figure 9.** Quantification of immunofluorescence confocal images showing (A) pDC expressing IFN- $\alpha$ , (B) SIGLEC1+ and NP+ Macrophages, (C) ISG15+ and NP+ Macrophages, (D) MX1+ T cells. Quantification was performed on Naïve (4 randomly selected lung lobes from 4 macaques) and SARS CoV-2 infected Rhesus macaque lungs at Day 3 (4 randomly selected lung lobes from 2 macaques) and Day 14-17 (4 randomly selected lung lobes from 4 macaques) post-infection. Data are presented as mean  $\pm$  standard error of the mean (SEM). Source data are provided as a Source Data file.

## Supplementary Figure 10

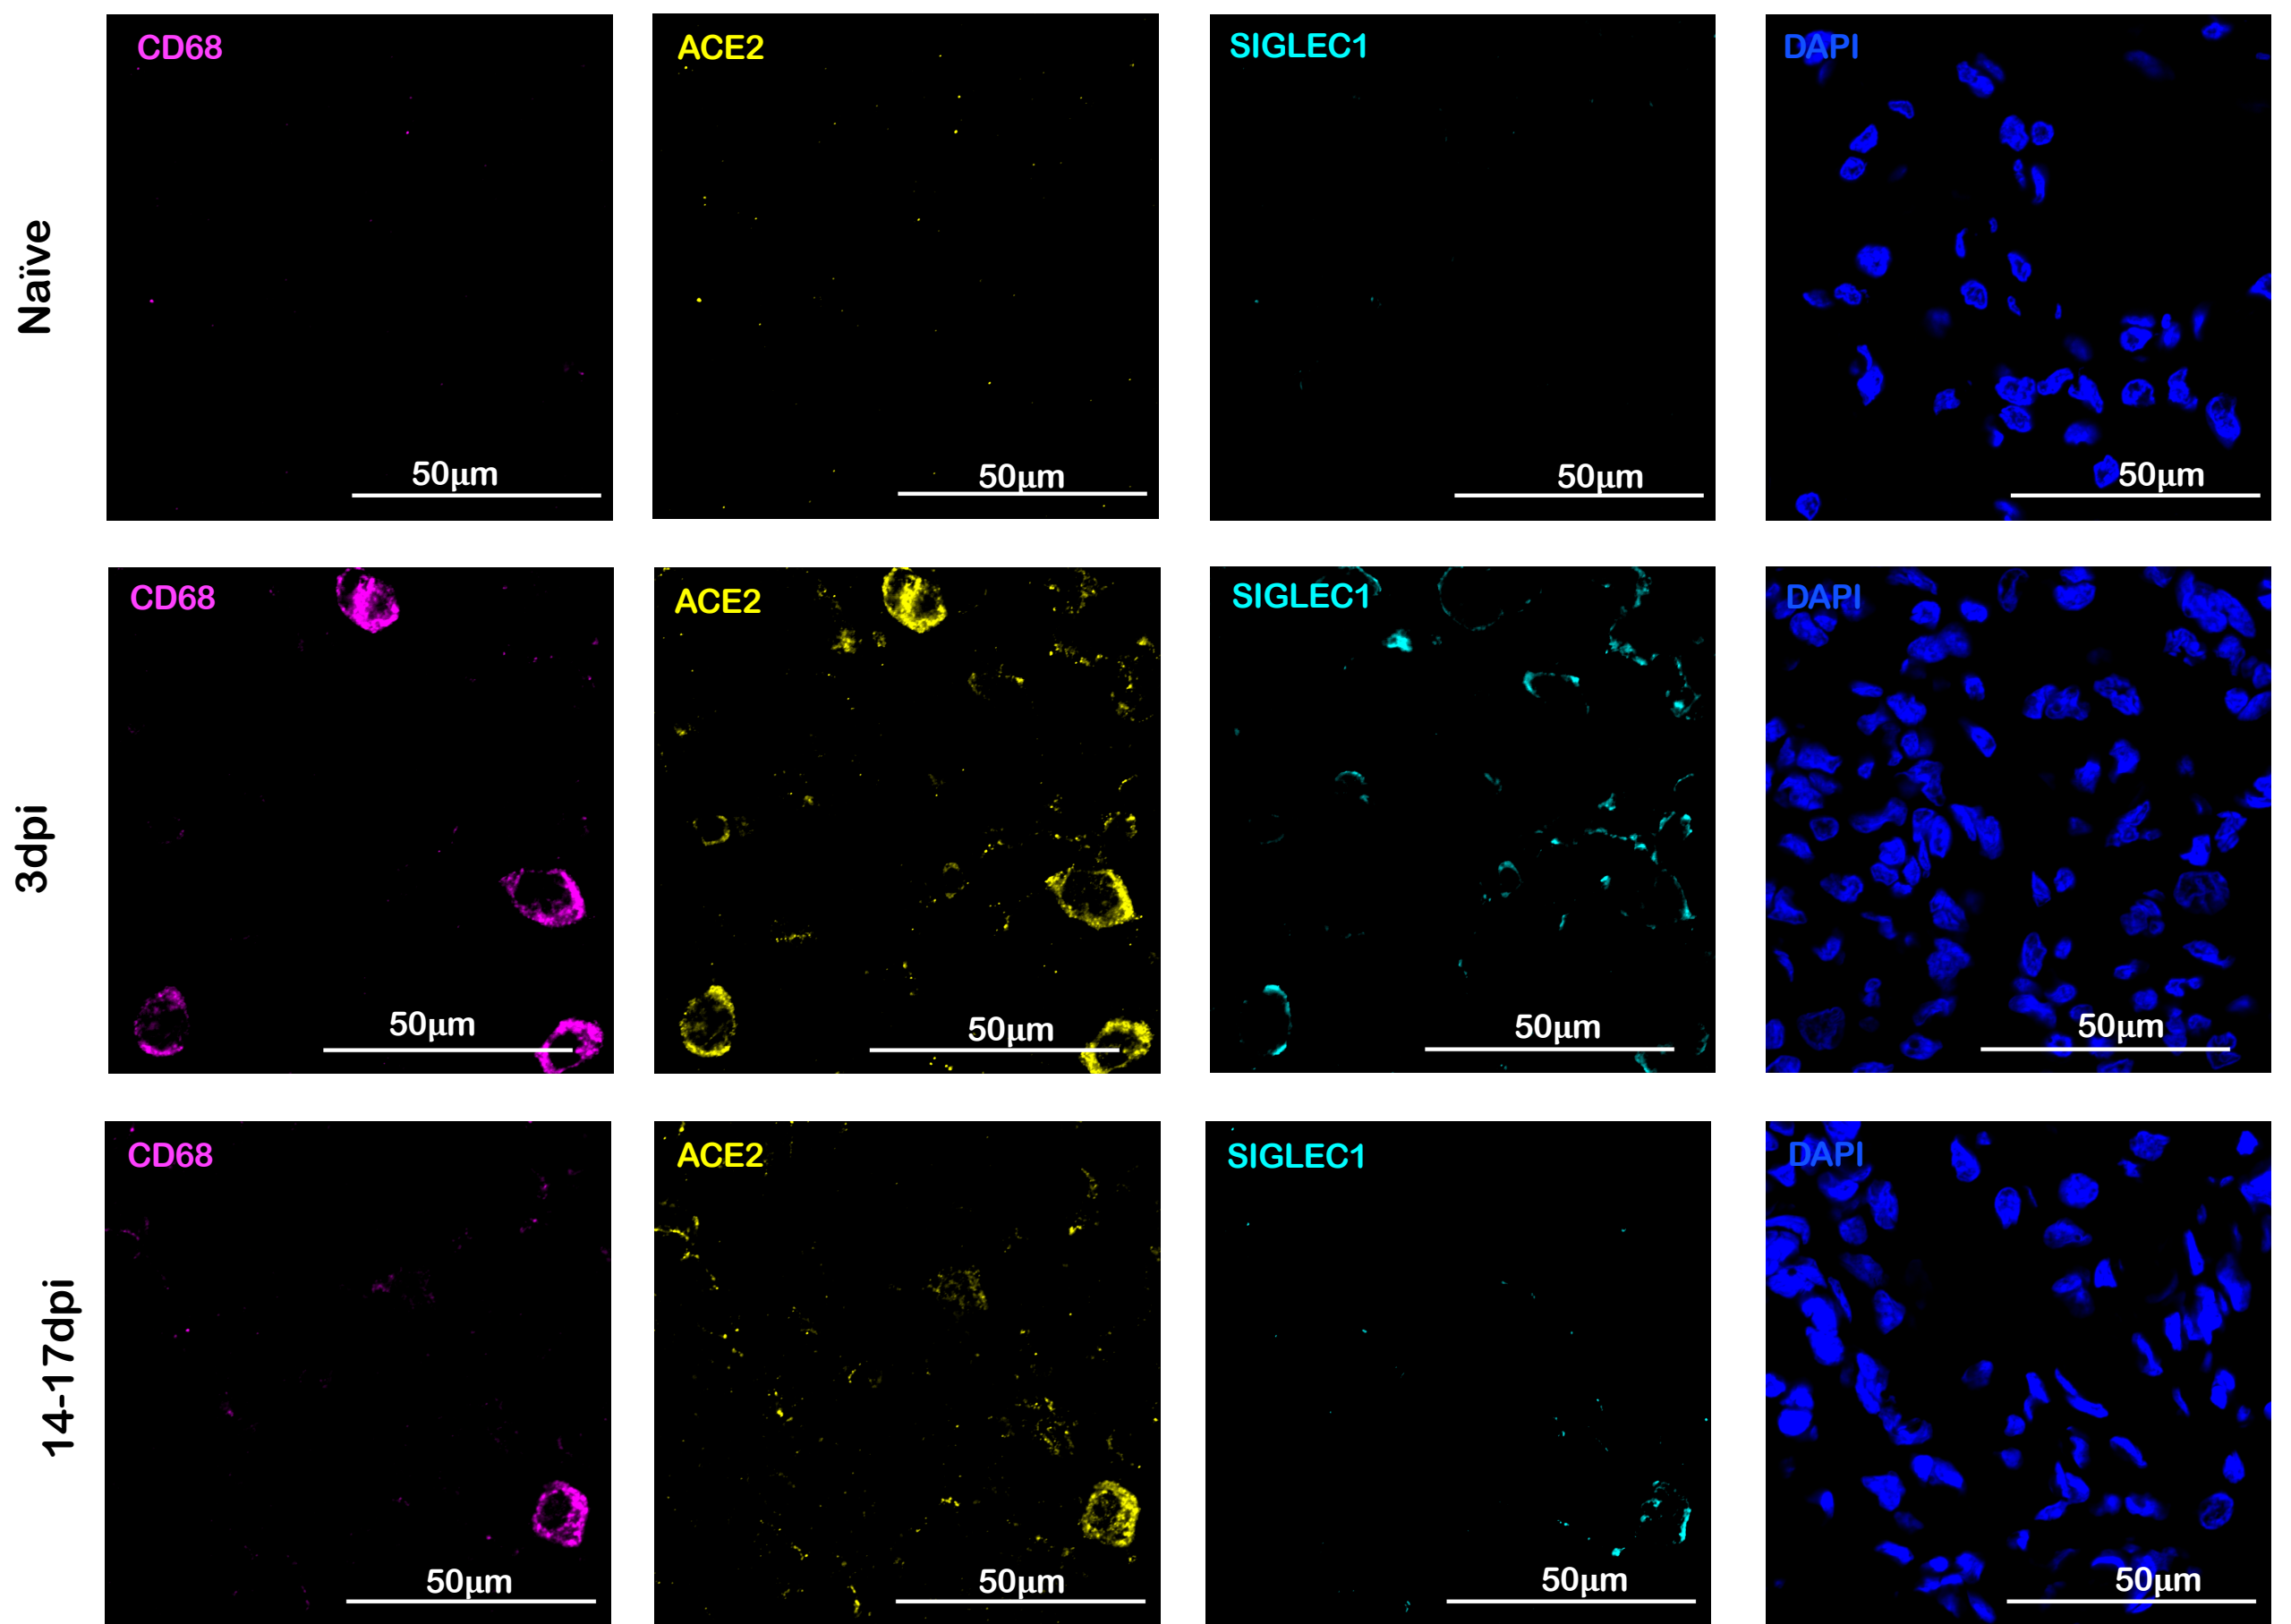

**Supplementary Figure 10.** Single channel images validating the expression of ACE2 receptor (yellow) on CD68 (magenta) and SIGLEC1 (turquoise) positive macrophages in Naïve and SARS CoV-2 infected lungs (3dpi and 14-17dpi).

## Supplementary Figure 11

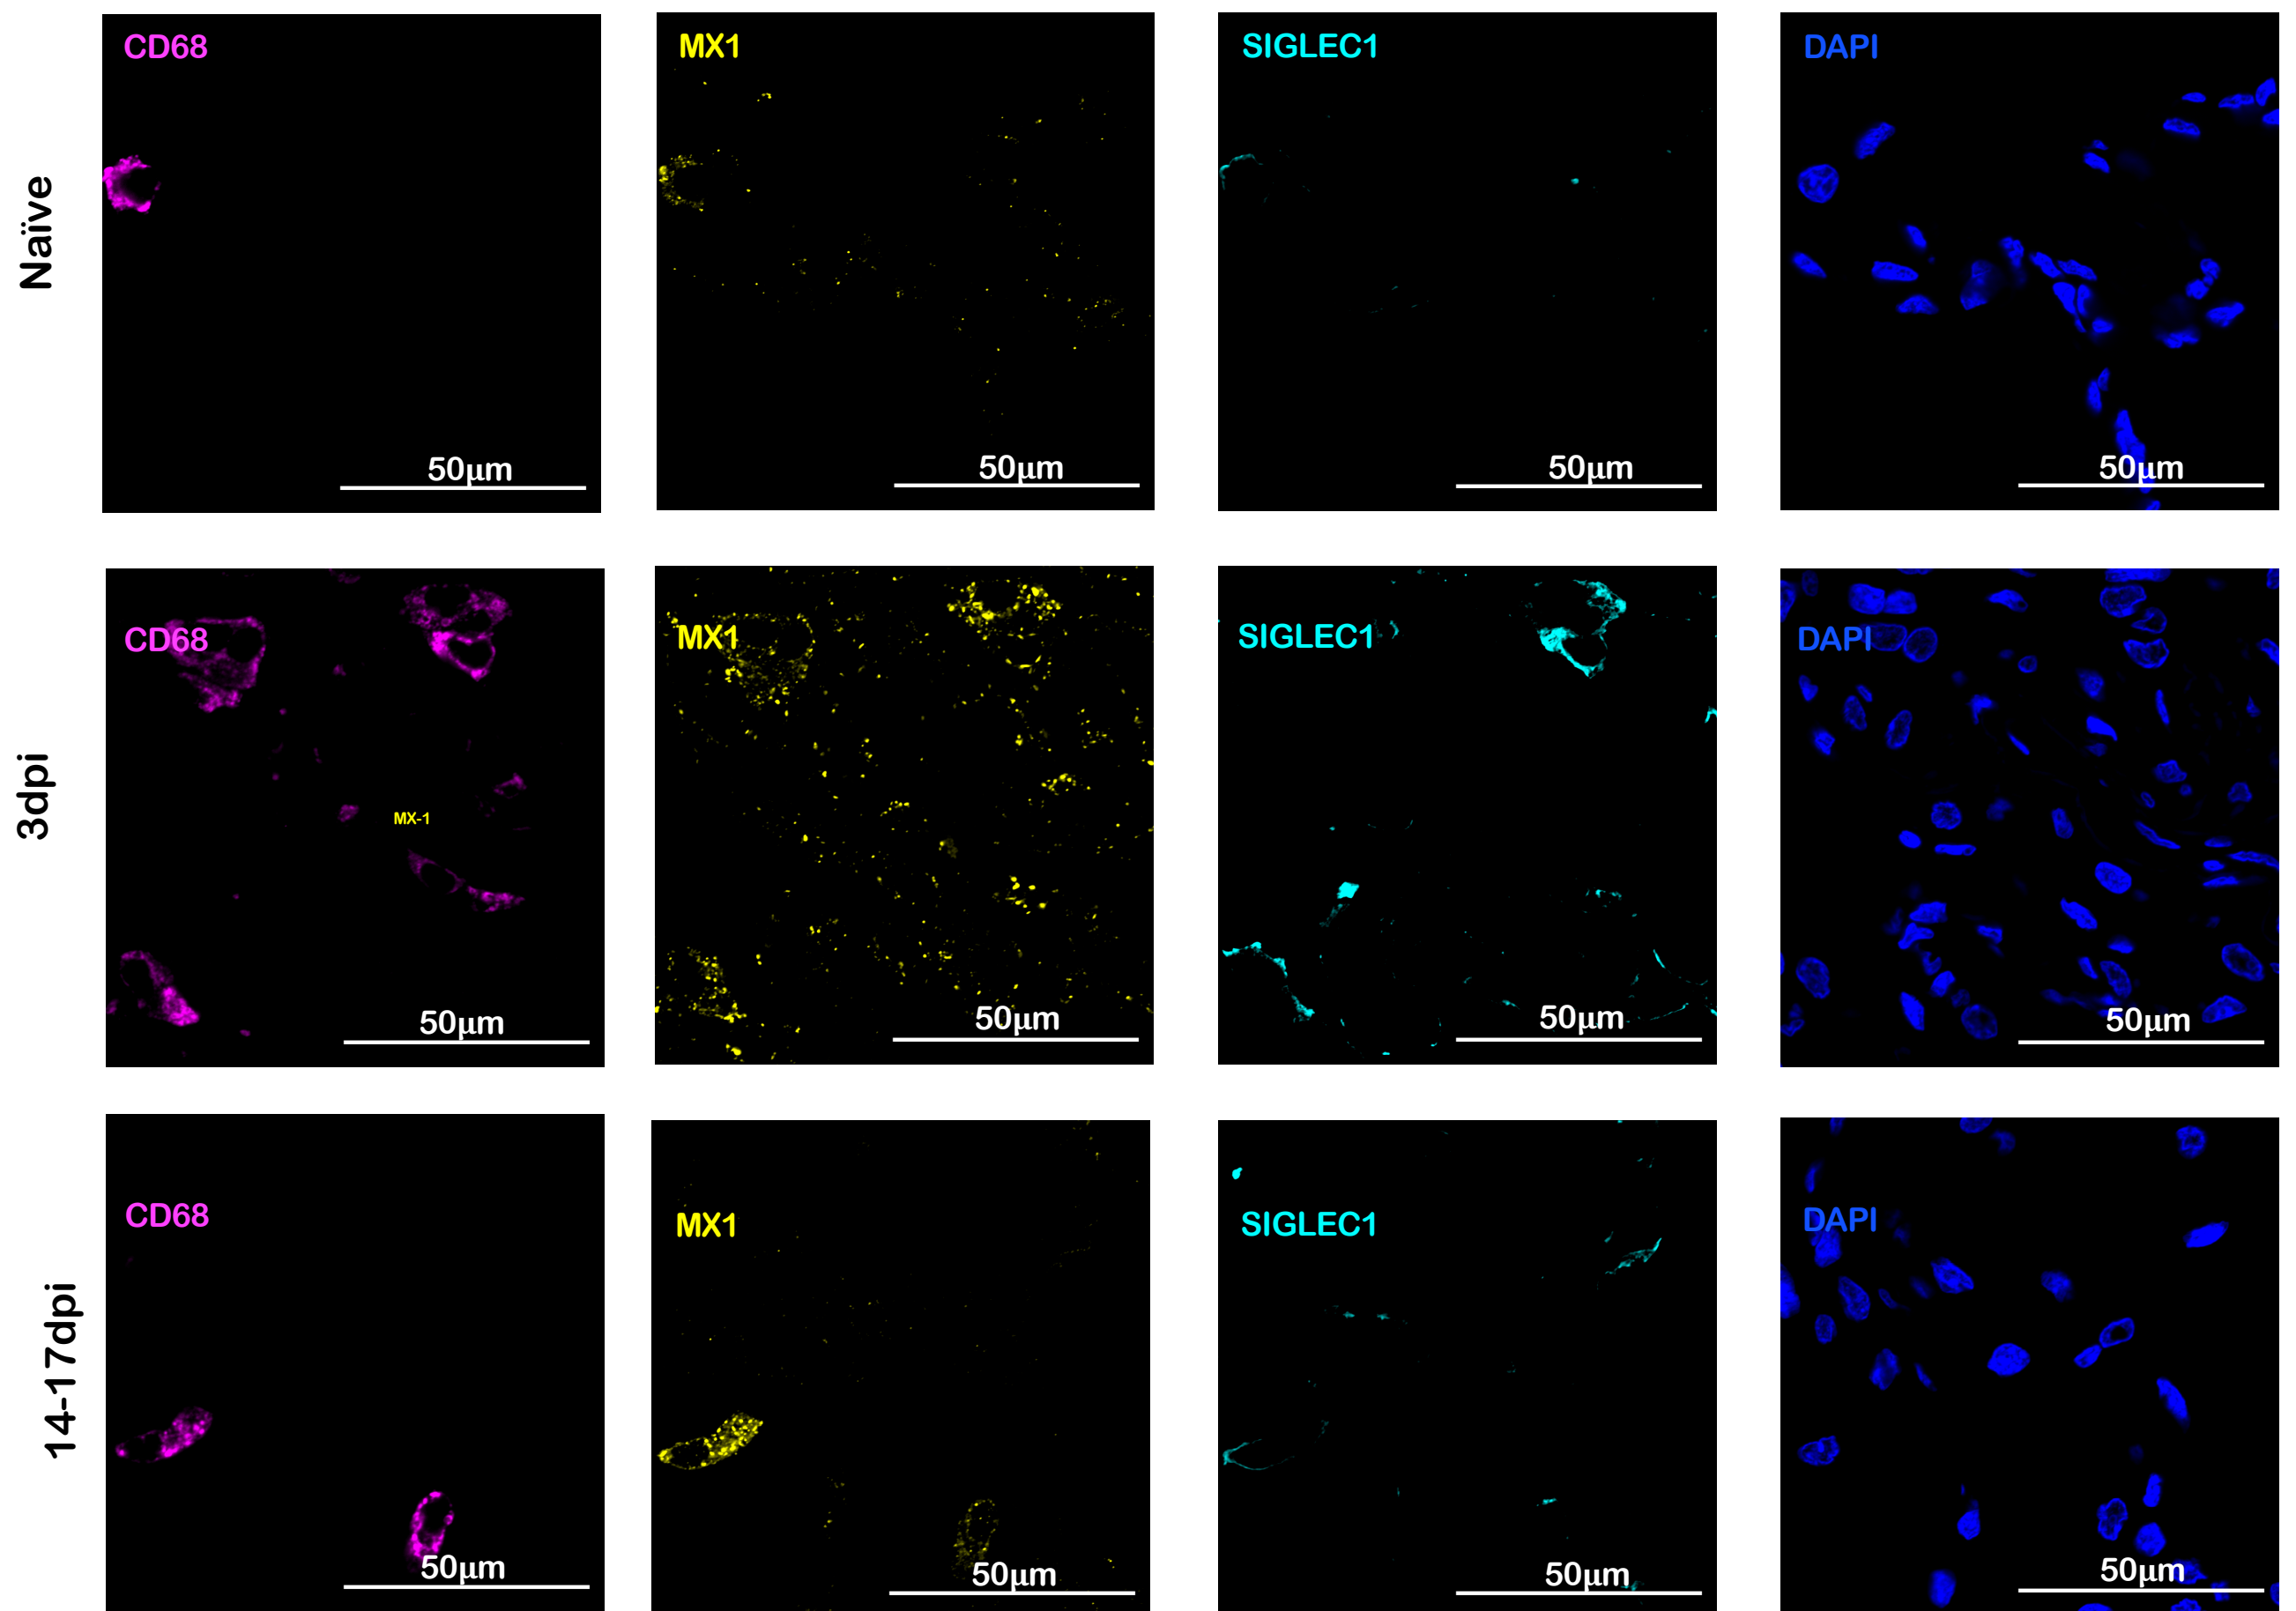

**Supplementary Figure 11.** Images showing separate channels for expression of Mac-IFN signature marker MX1 (yellow) by CD68 (magenta) and SIGLEC1 (turquoise) positive macrophages in Naïve as well as 3dpi and 14-17dpi SARS CoV-2 infected macaque lungs.

## Supplementary Figure 12

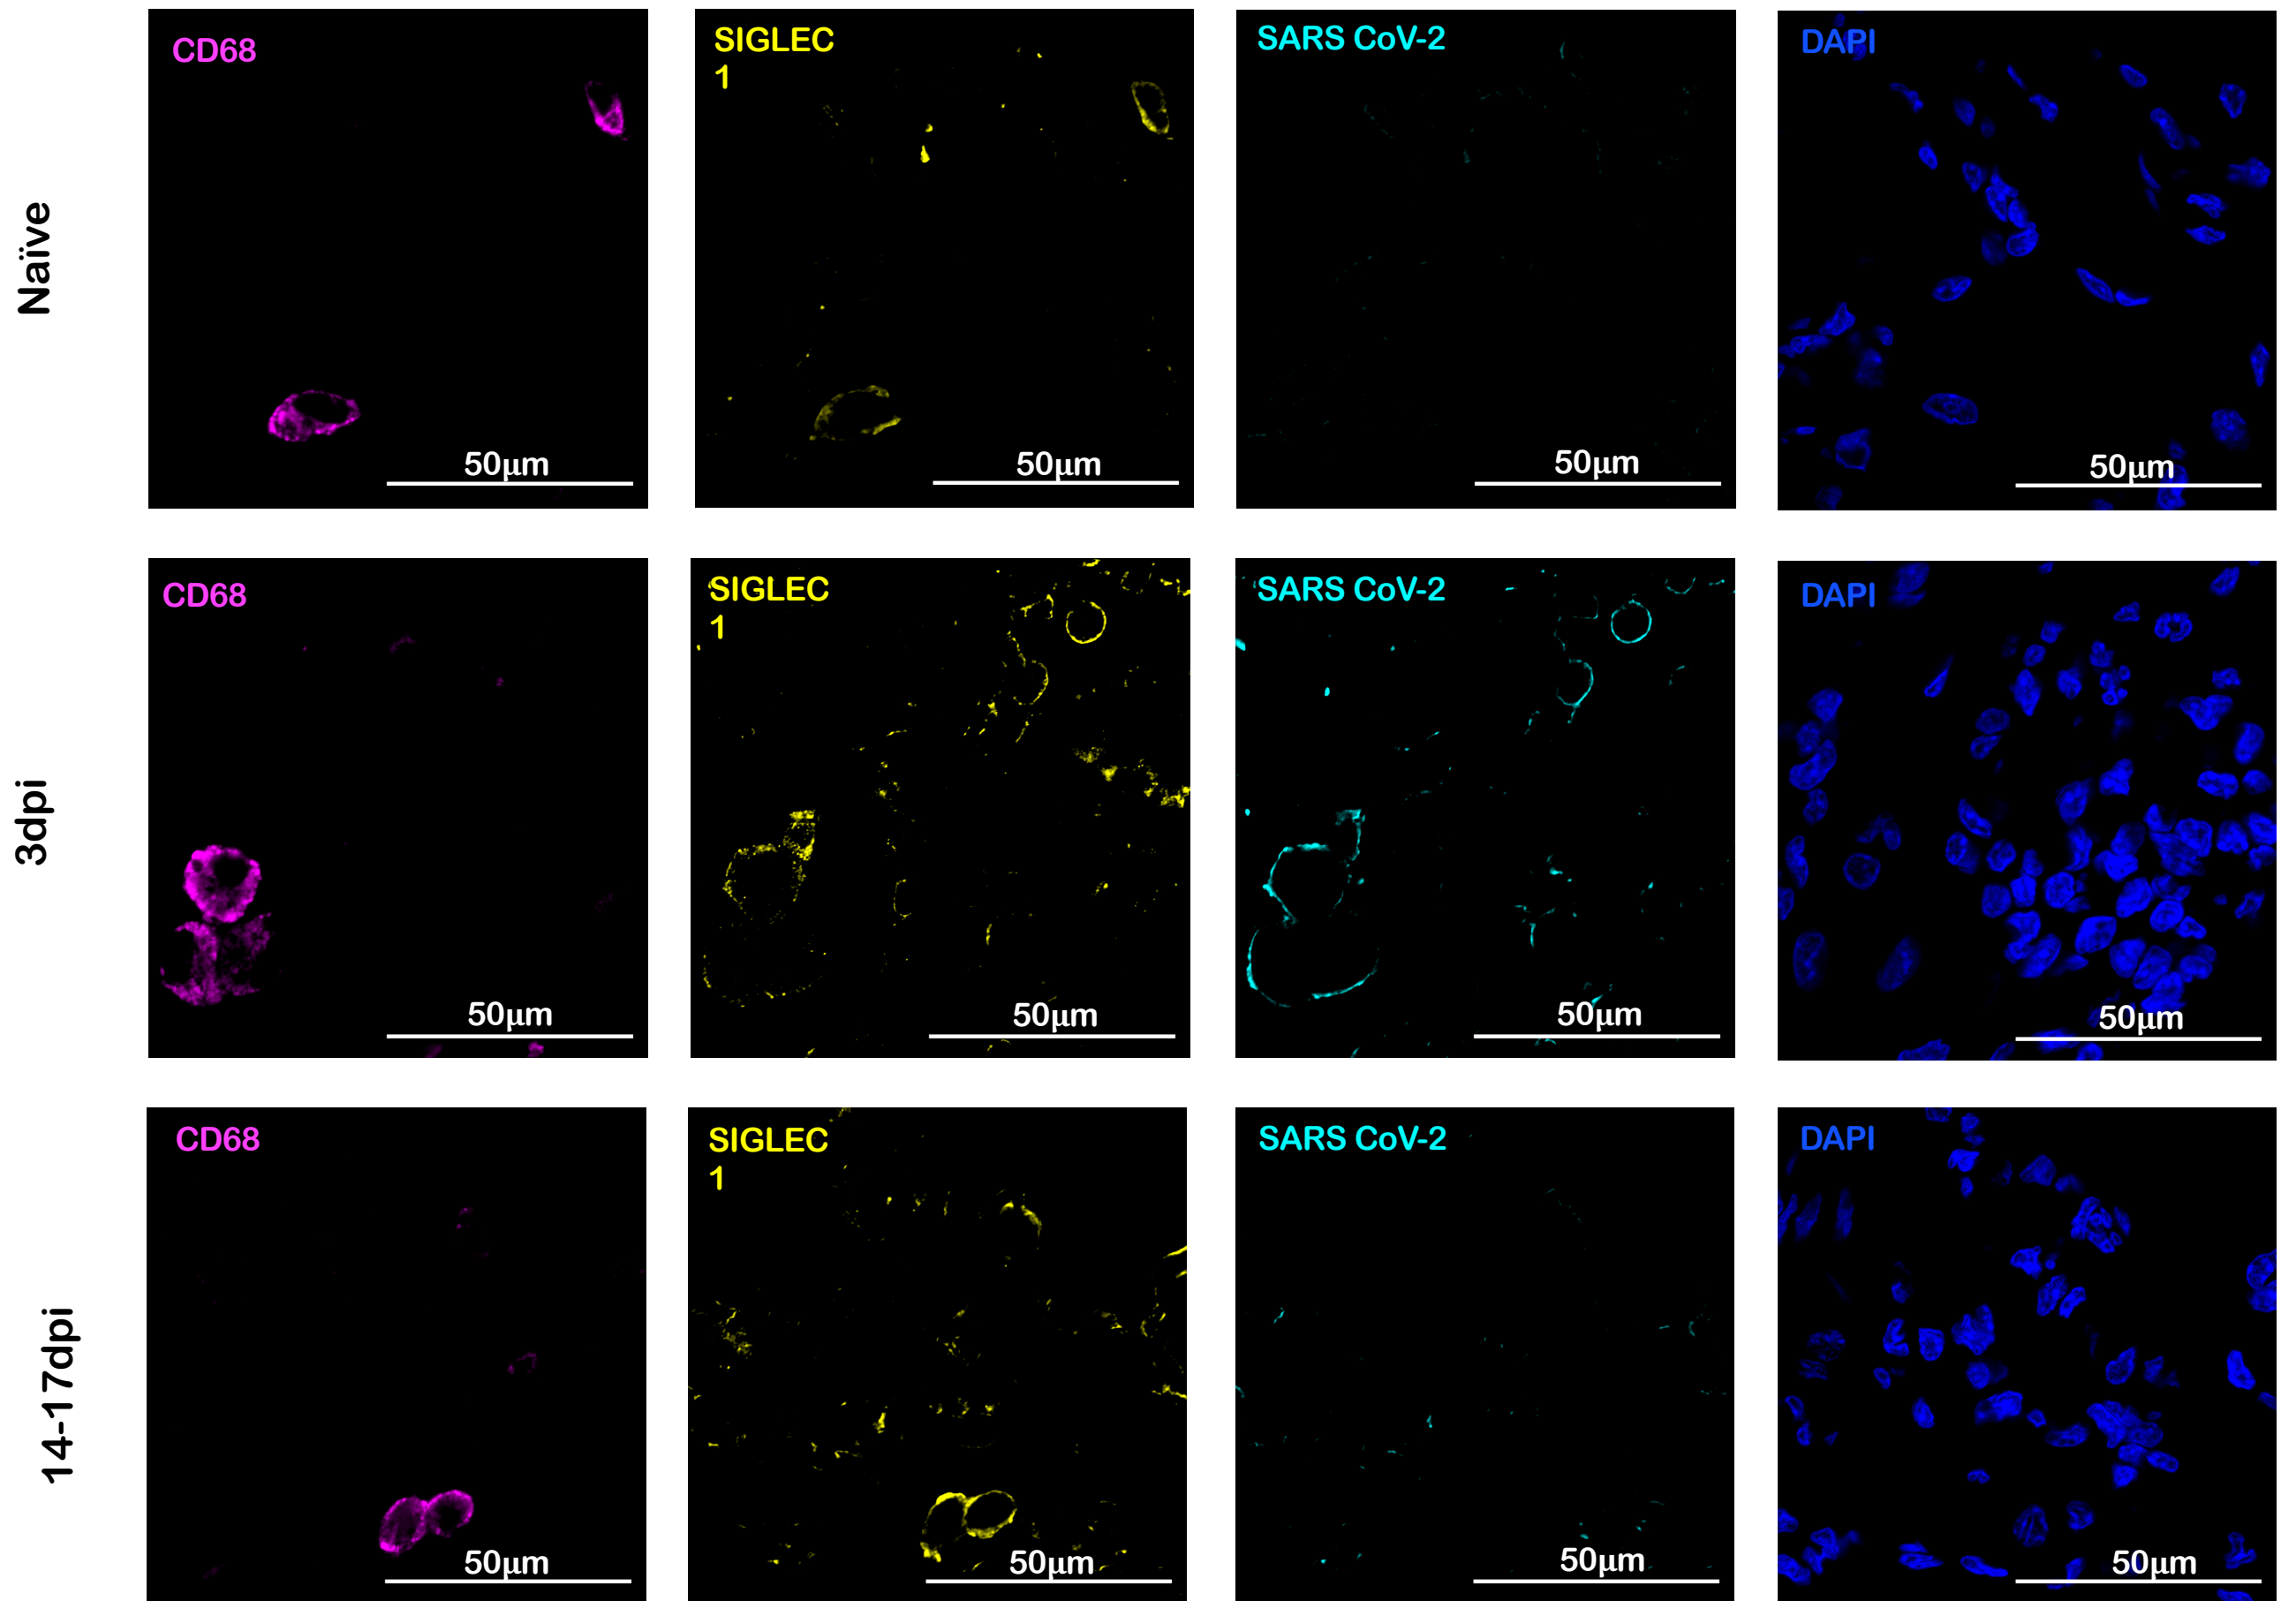

**Supplementary Figure 12.** Single color images from Naïve and SARS CoV-2 infected lungs (3dpi and 14-17dpi) depicting SARS CoV-2 (turquoise) is harbored by CD68 (magenta) and SIGLEC1 (yellow) positive macrophages.

### Supplementary Figure 13

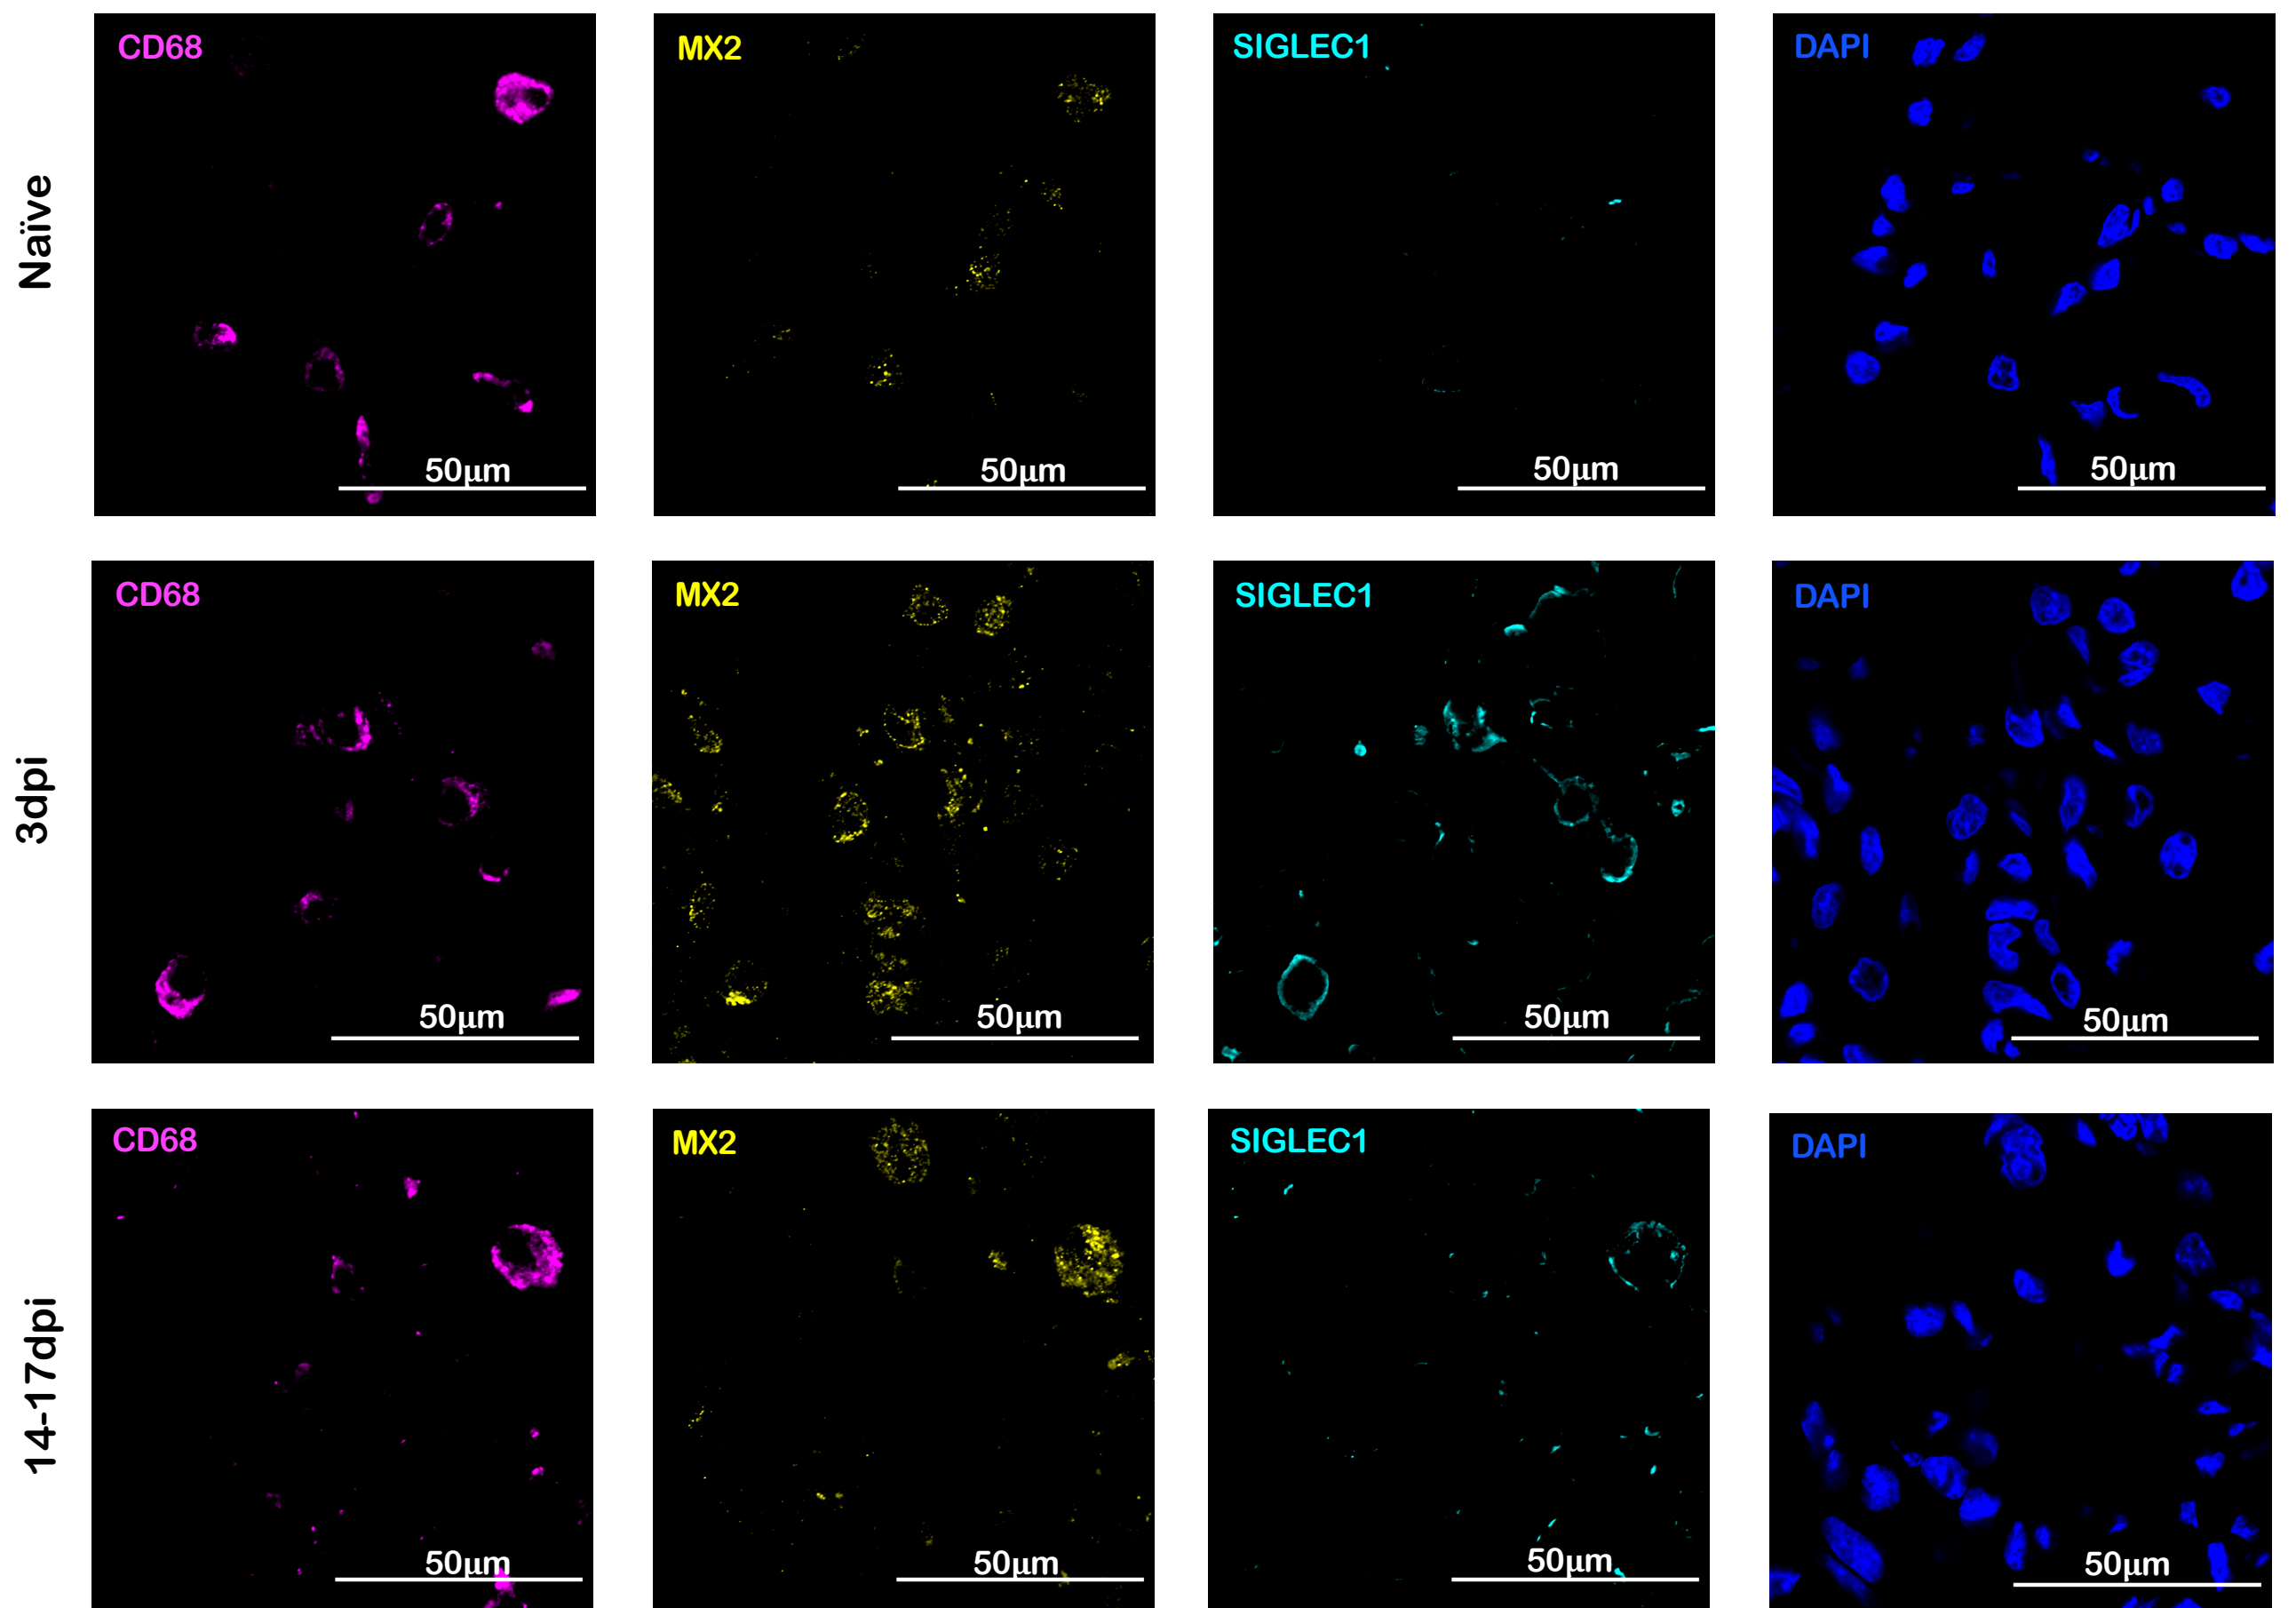

**Supplementary Figure 13.** Shown are the images for single channels for CD68 (magenta) and SIGLEC1 (turquoise) positive macrophages expressing MX2 (yellow), one of the Mac-IFN signature markers. Images from Naïve as well as SARS CoV-2 infected lungs at Day 3 and Day 14 post-infection were taken to see the differential expression.

## Supplementary Figure 14

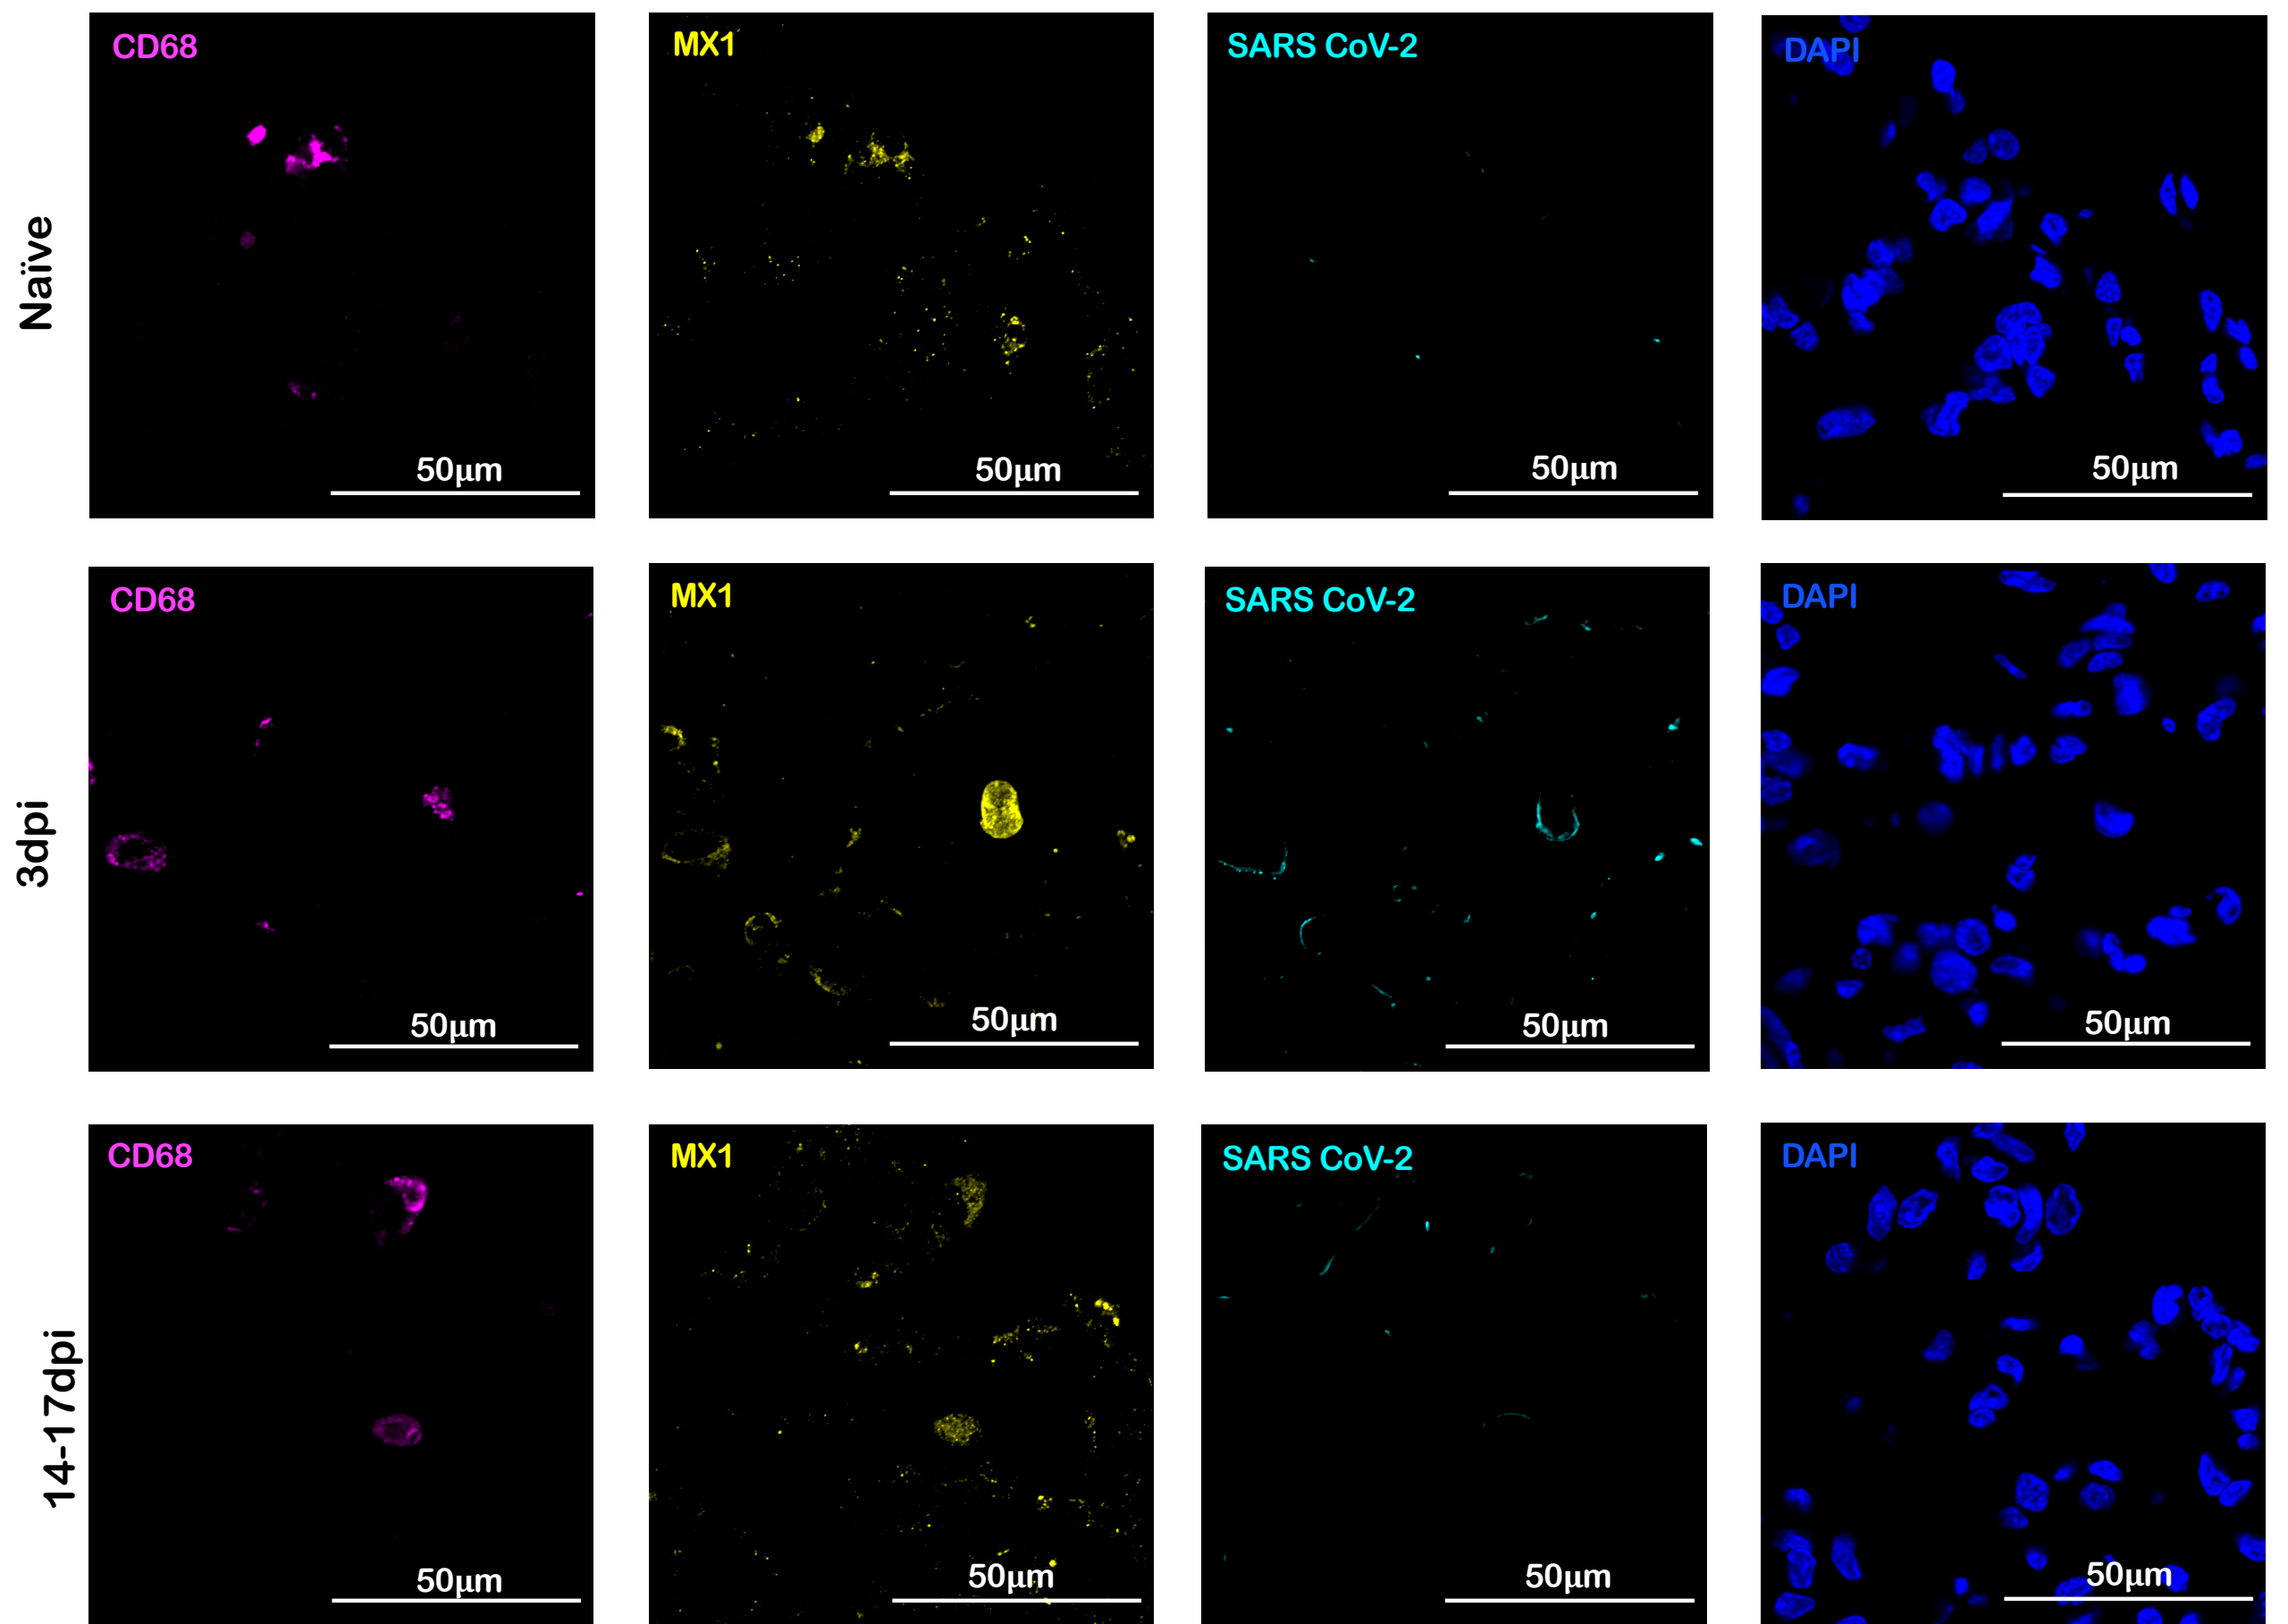

**Supplementary Figure 14.** Shown are the single-channel images from Naïve and SARS CoV-2 infected lung sections (3dpi and 14-17dpi) depicting CD68 (magenta) and MX1 (yellow) positive macrophages harbors SARS CoV-2 (turquoise).

## Supplementary Figure 15

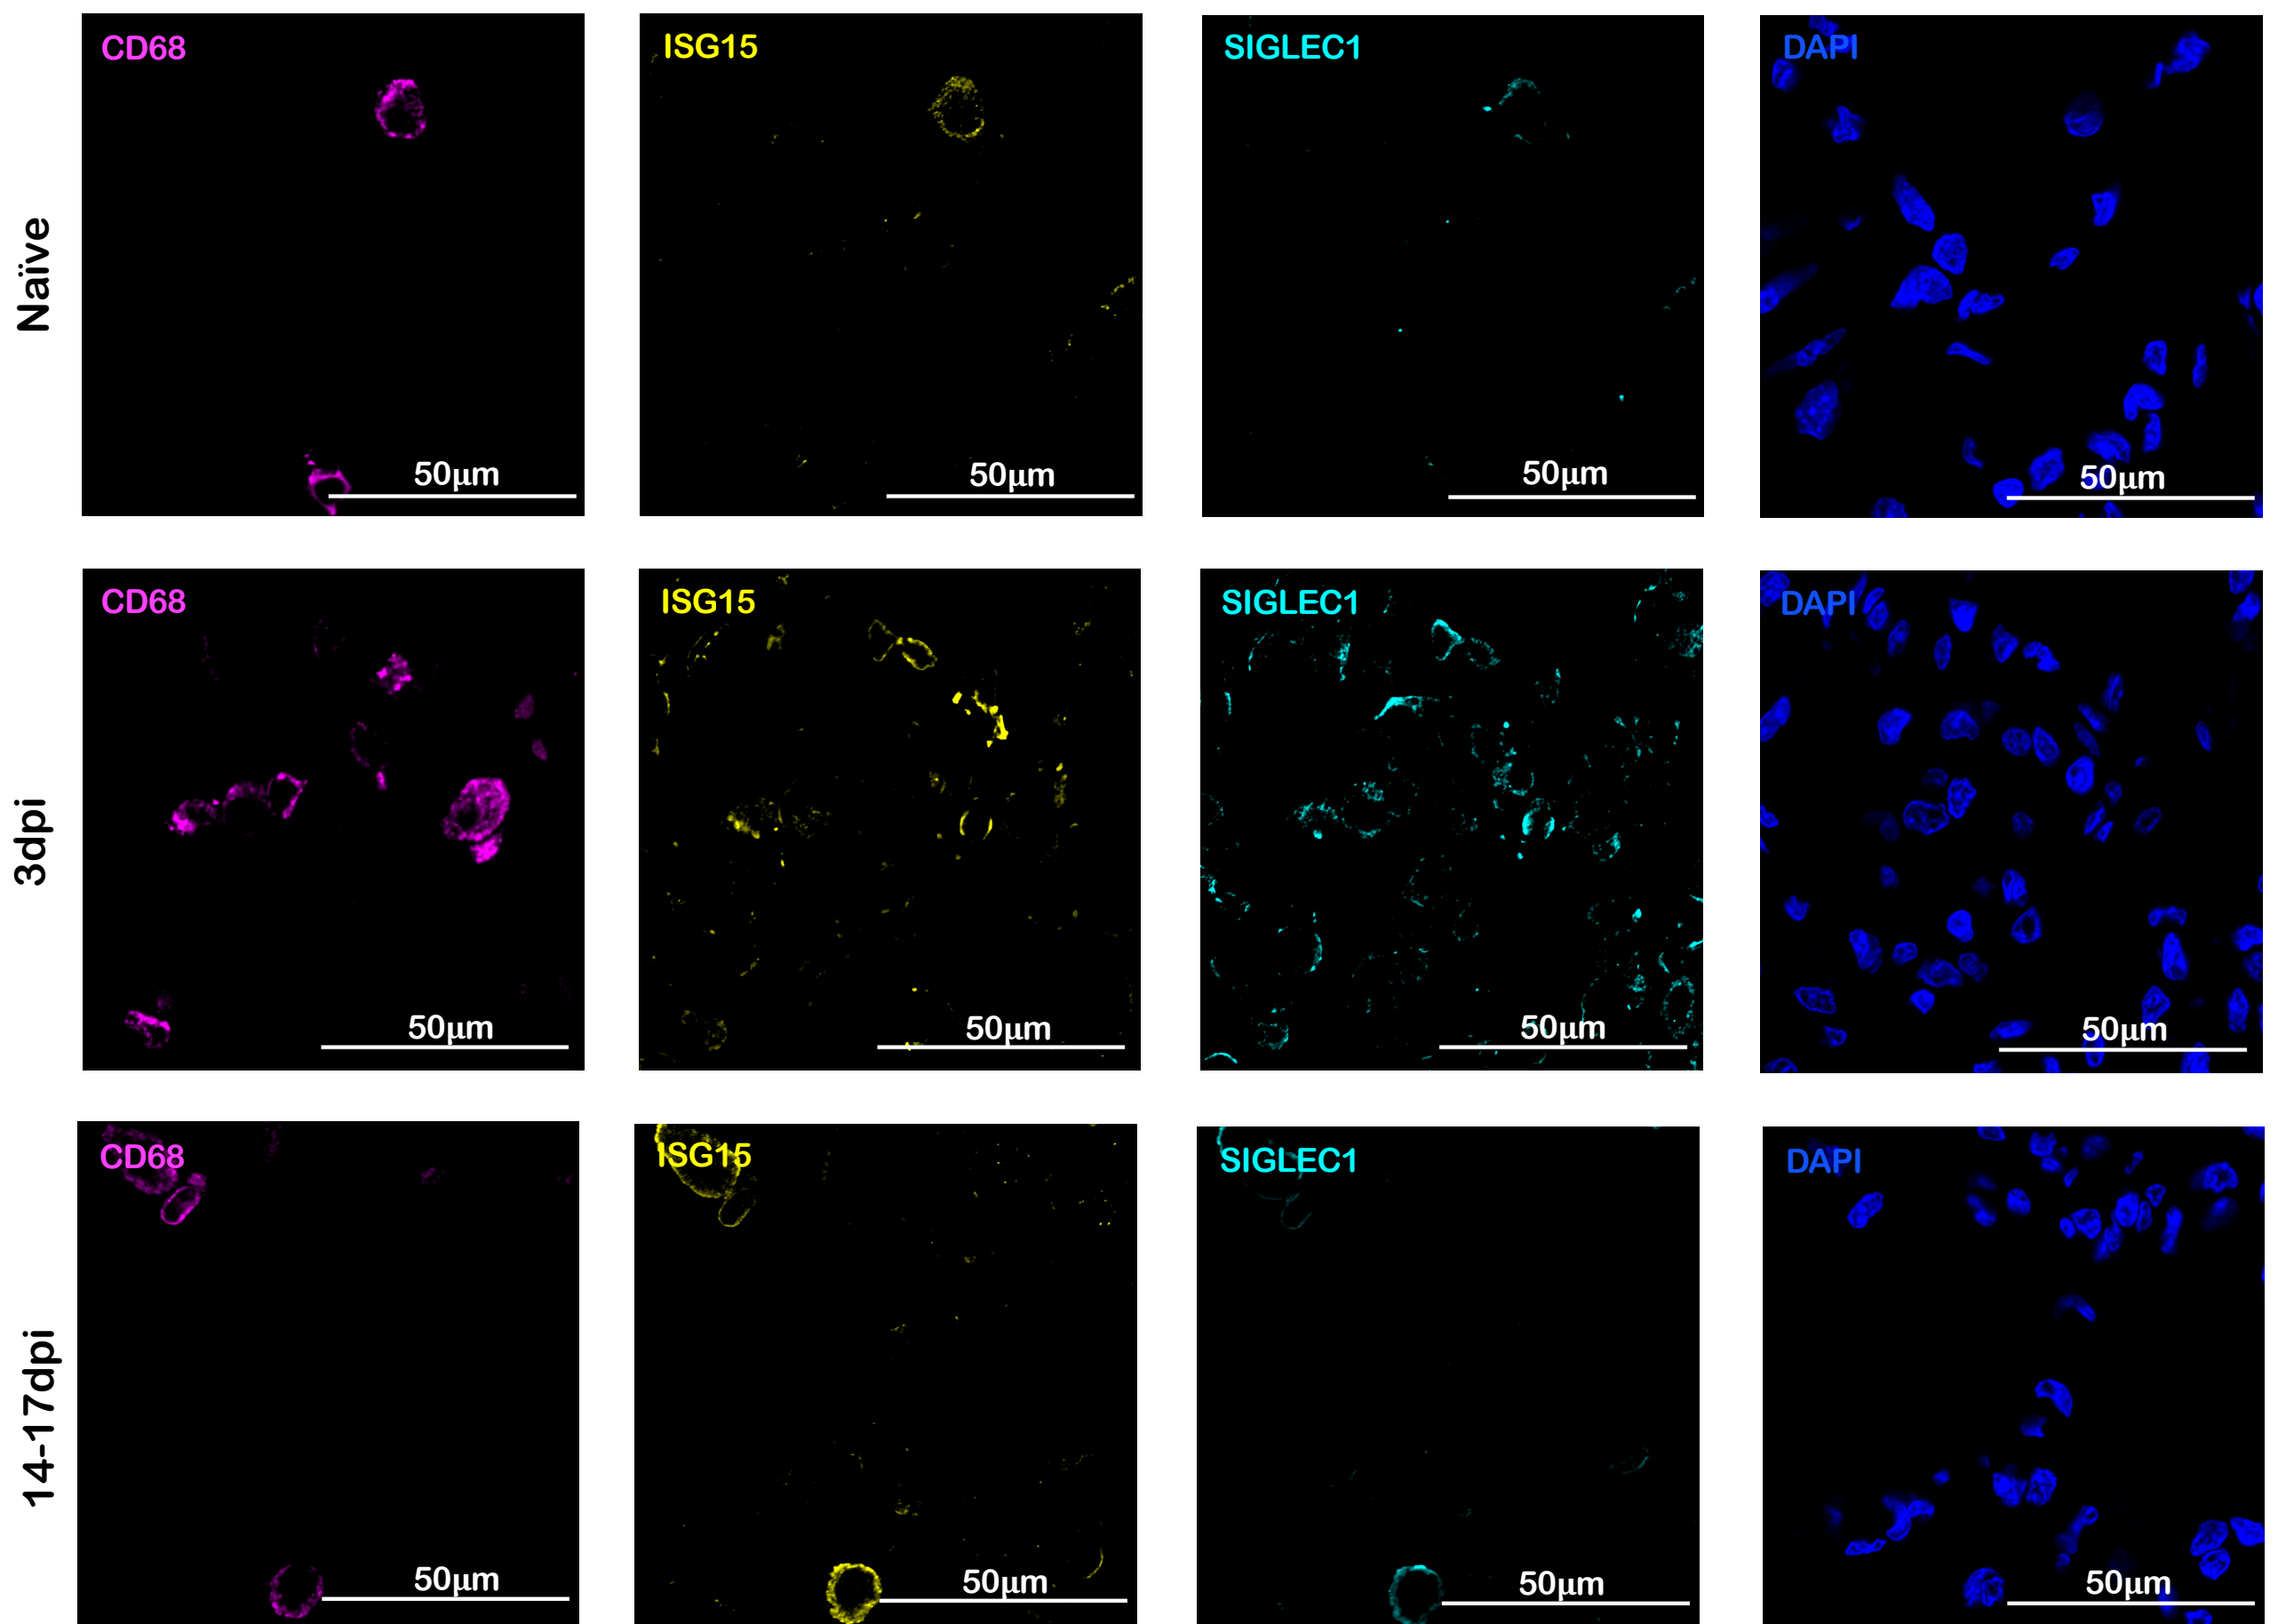

**Supplementary Figure 15.** Single color images from the Naïve and SARS CoV-2 infected lungs sections (at 3dpi and 14-17dpi) showing CD68 (magenta) and SIGLEC1 (turquoise) positive macrophages expressing ISG15 (yellow), another Mac-IFN signature marker.



## Supplementary Figure 16

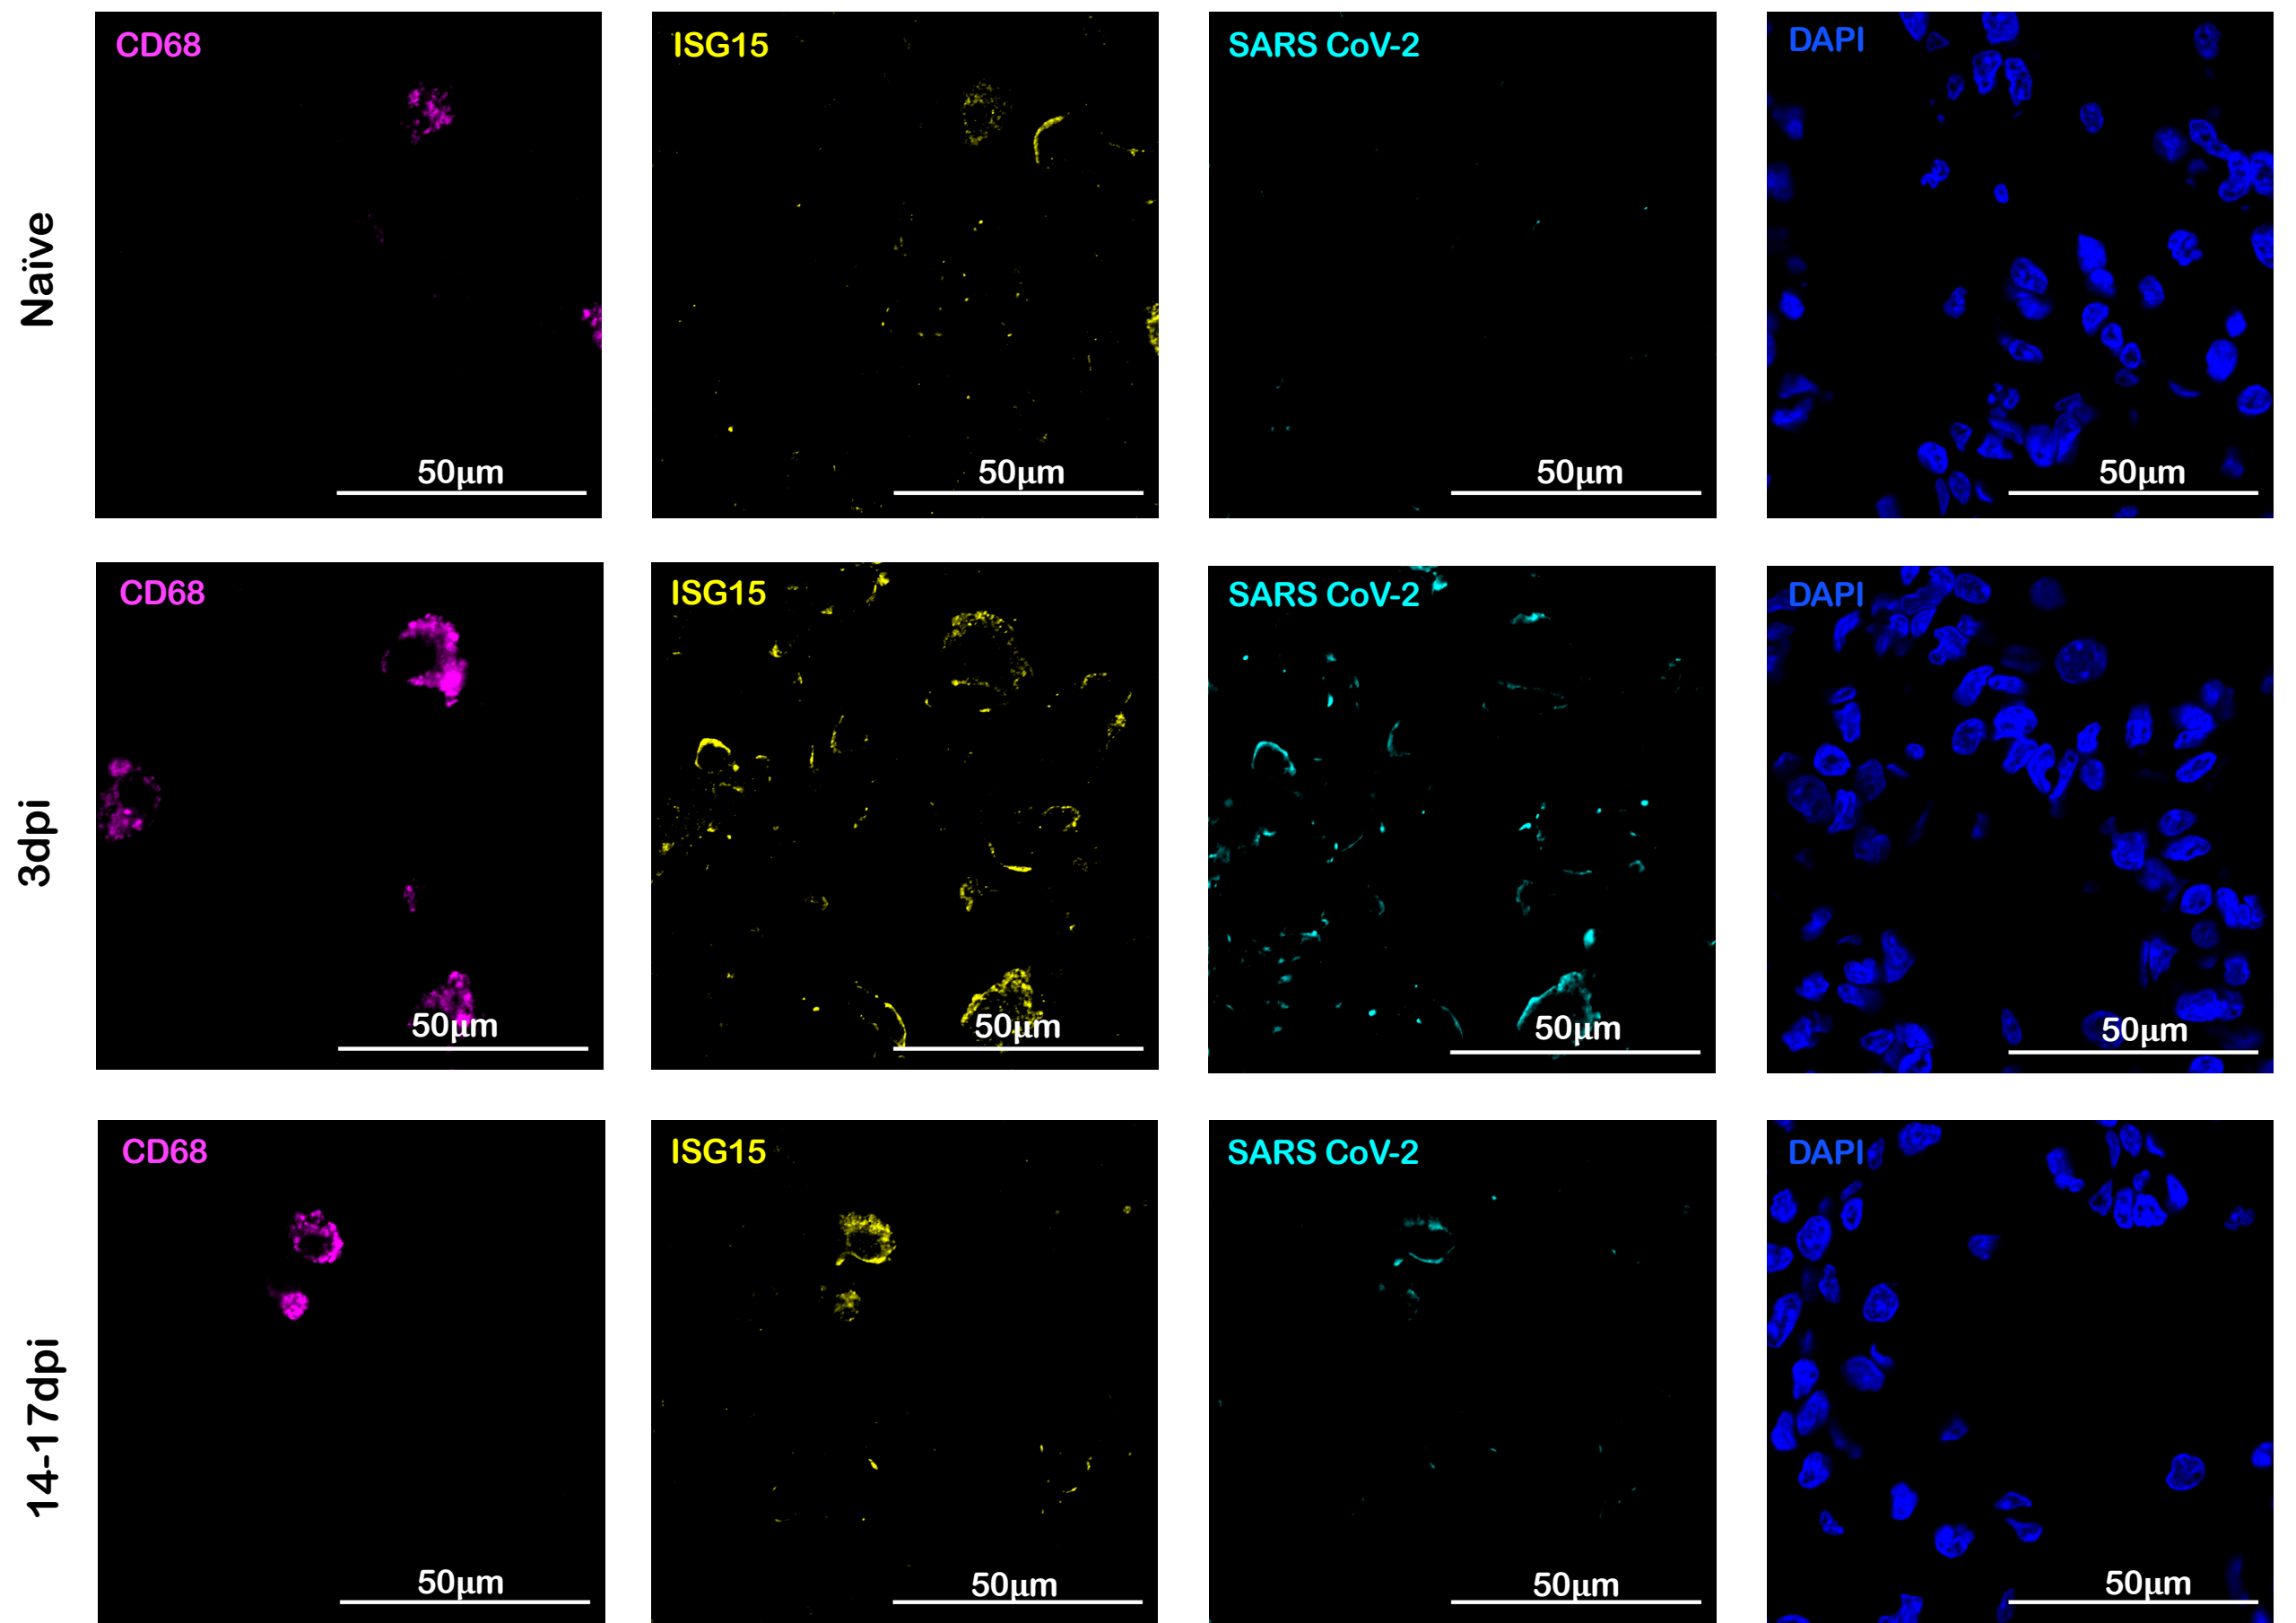

**Supplementary Figure 16.** Single color images depicting ISG15 (yellow) expressing macrophages (magenta) harbor SARS CoV-2 (turquoise). Images shown are from the Naïve and SARS CoV-2 infected lung sections both at 3dpi and 14-17dpi.

## Supplementary Figure 17

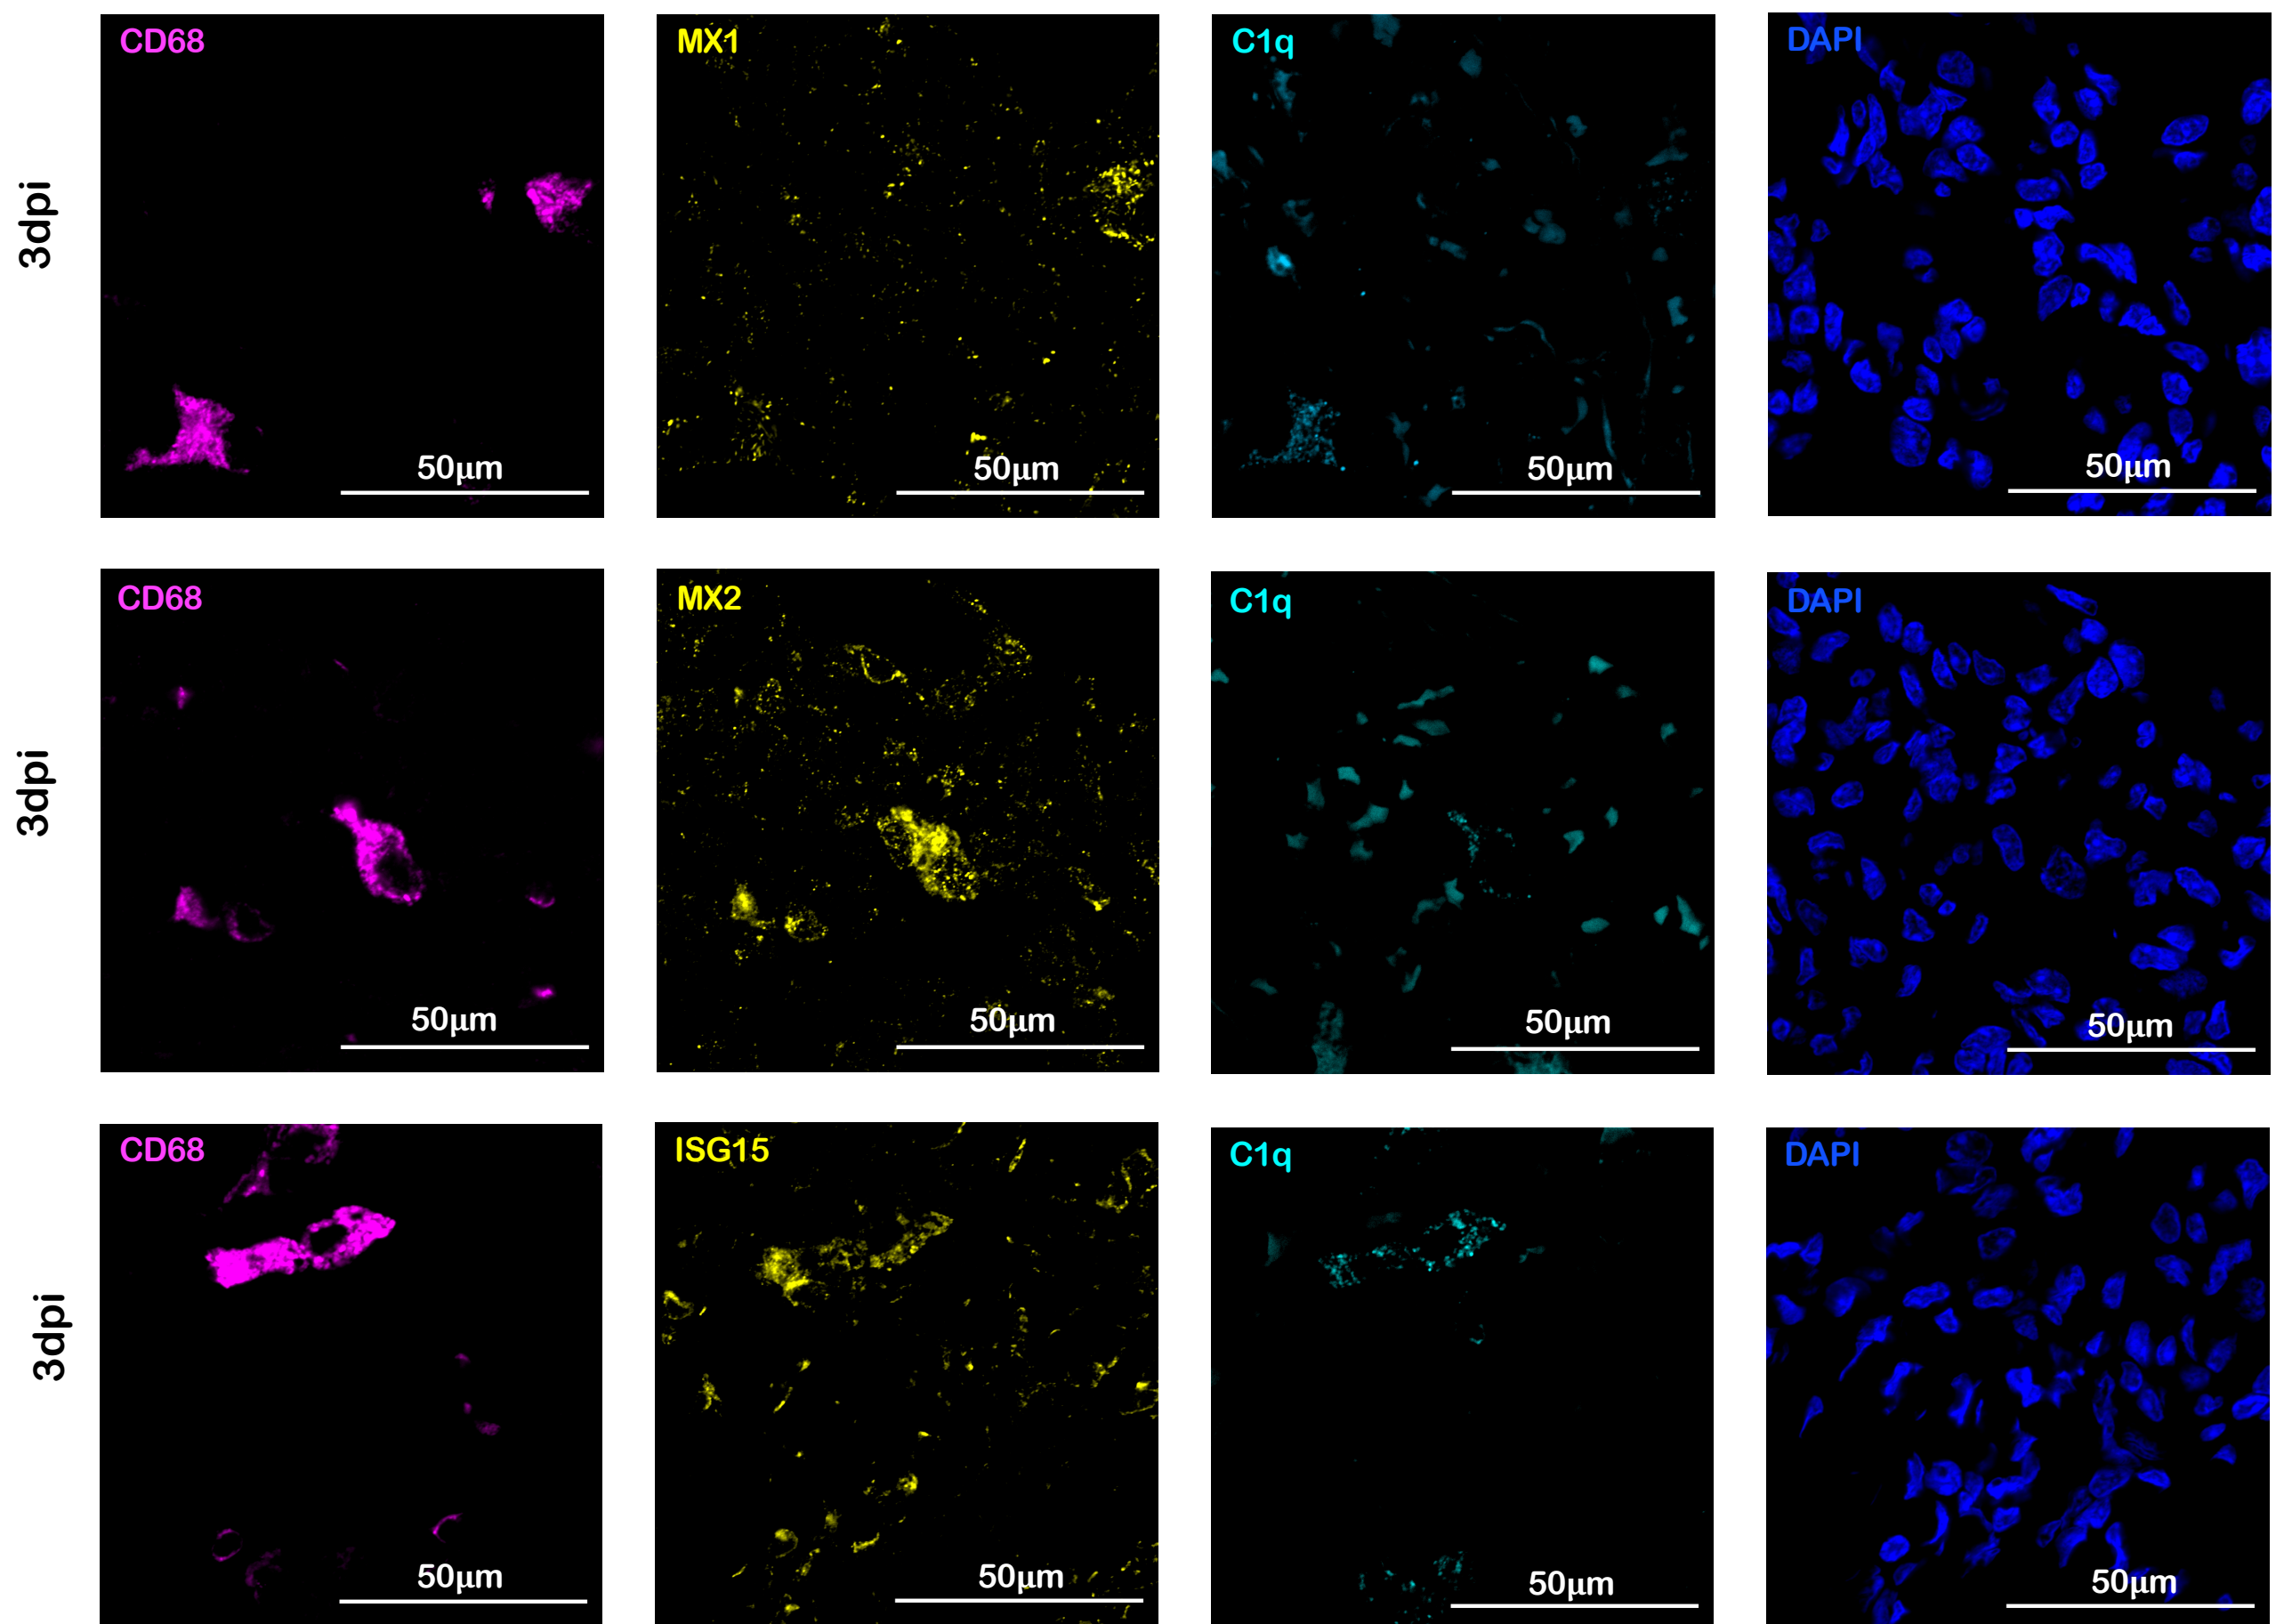

**Supplementary Figure 17.** Single channel images from lungs of SARS CoV-2 infected macaques at 3dpi showing the expression of Mac-IFN signature markers: MX1, MX2 and ISG15 (yellow) and TREM marker: C1q (turquoise) in CD68 positive macrophages (magenta).

## Supplementary Figure 18

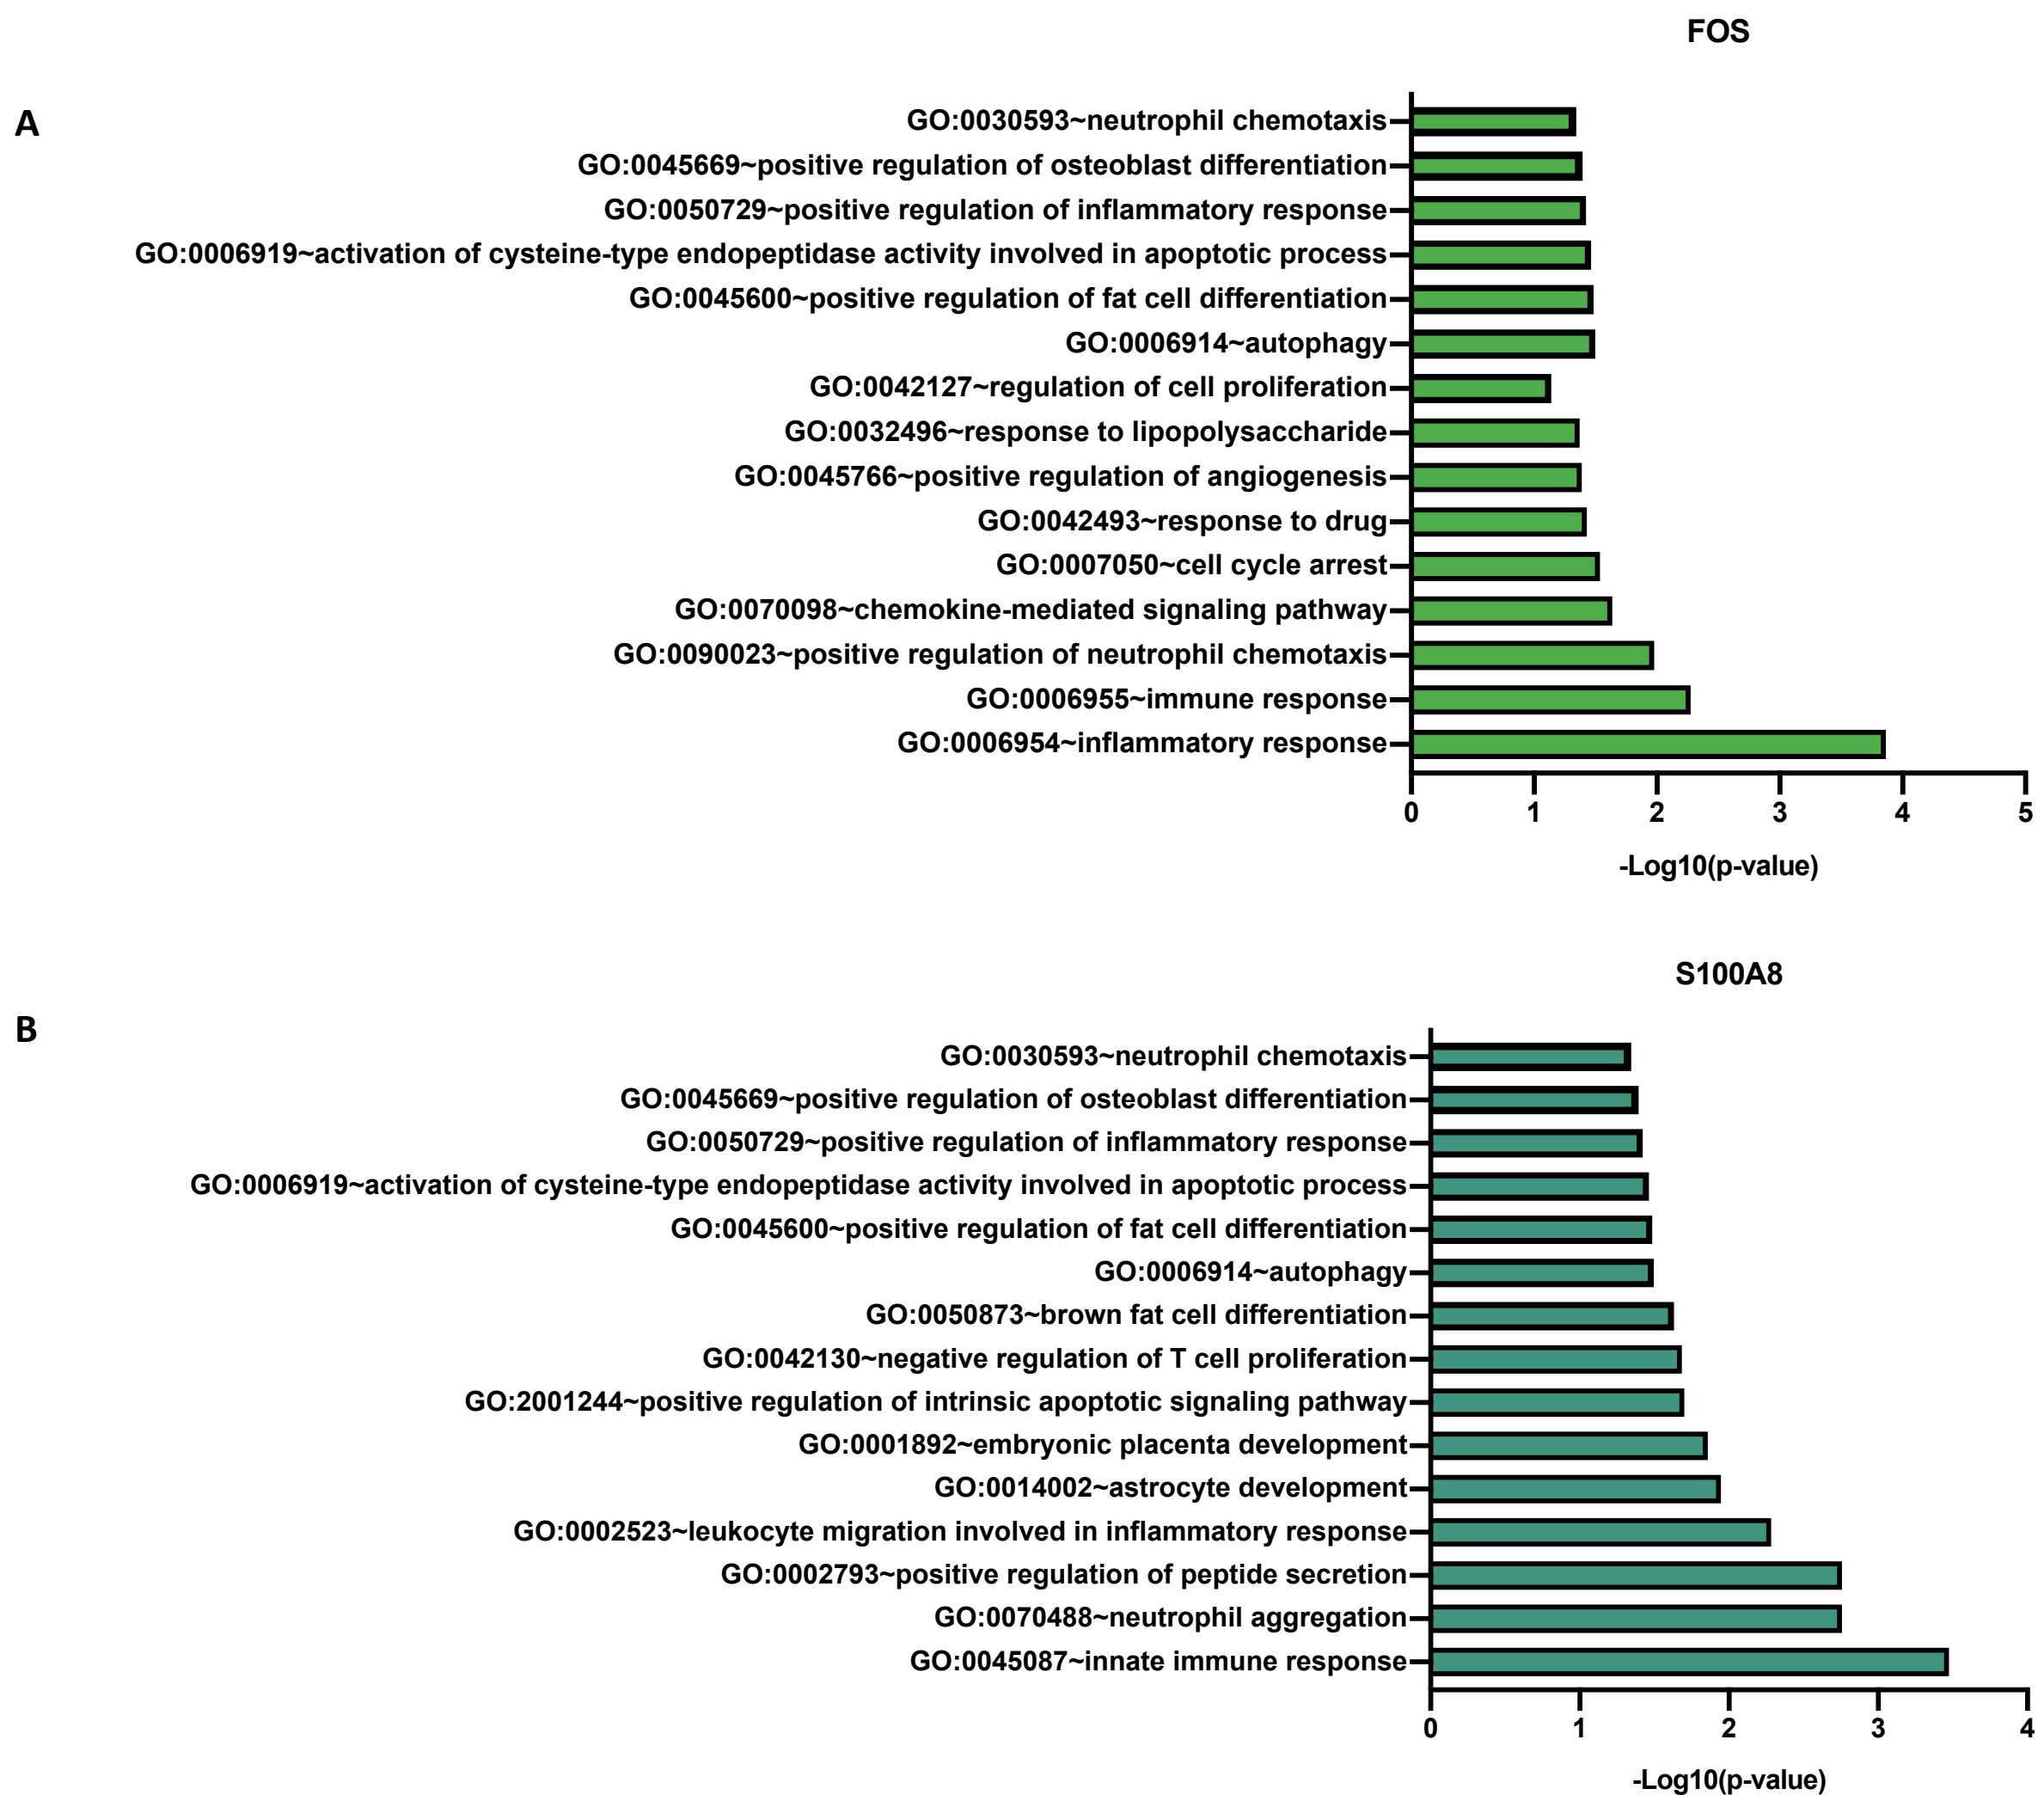

**Supplementary Figure 18.** GSEA enrichment set in (A) Mac\_FOS and (B) Mac\_S100A8 cluster.

## Supplementary Figure 19

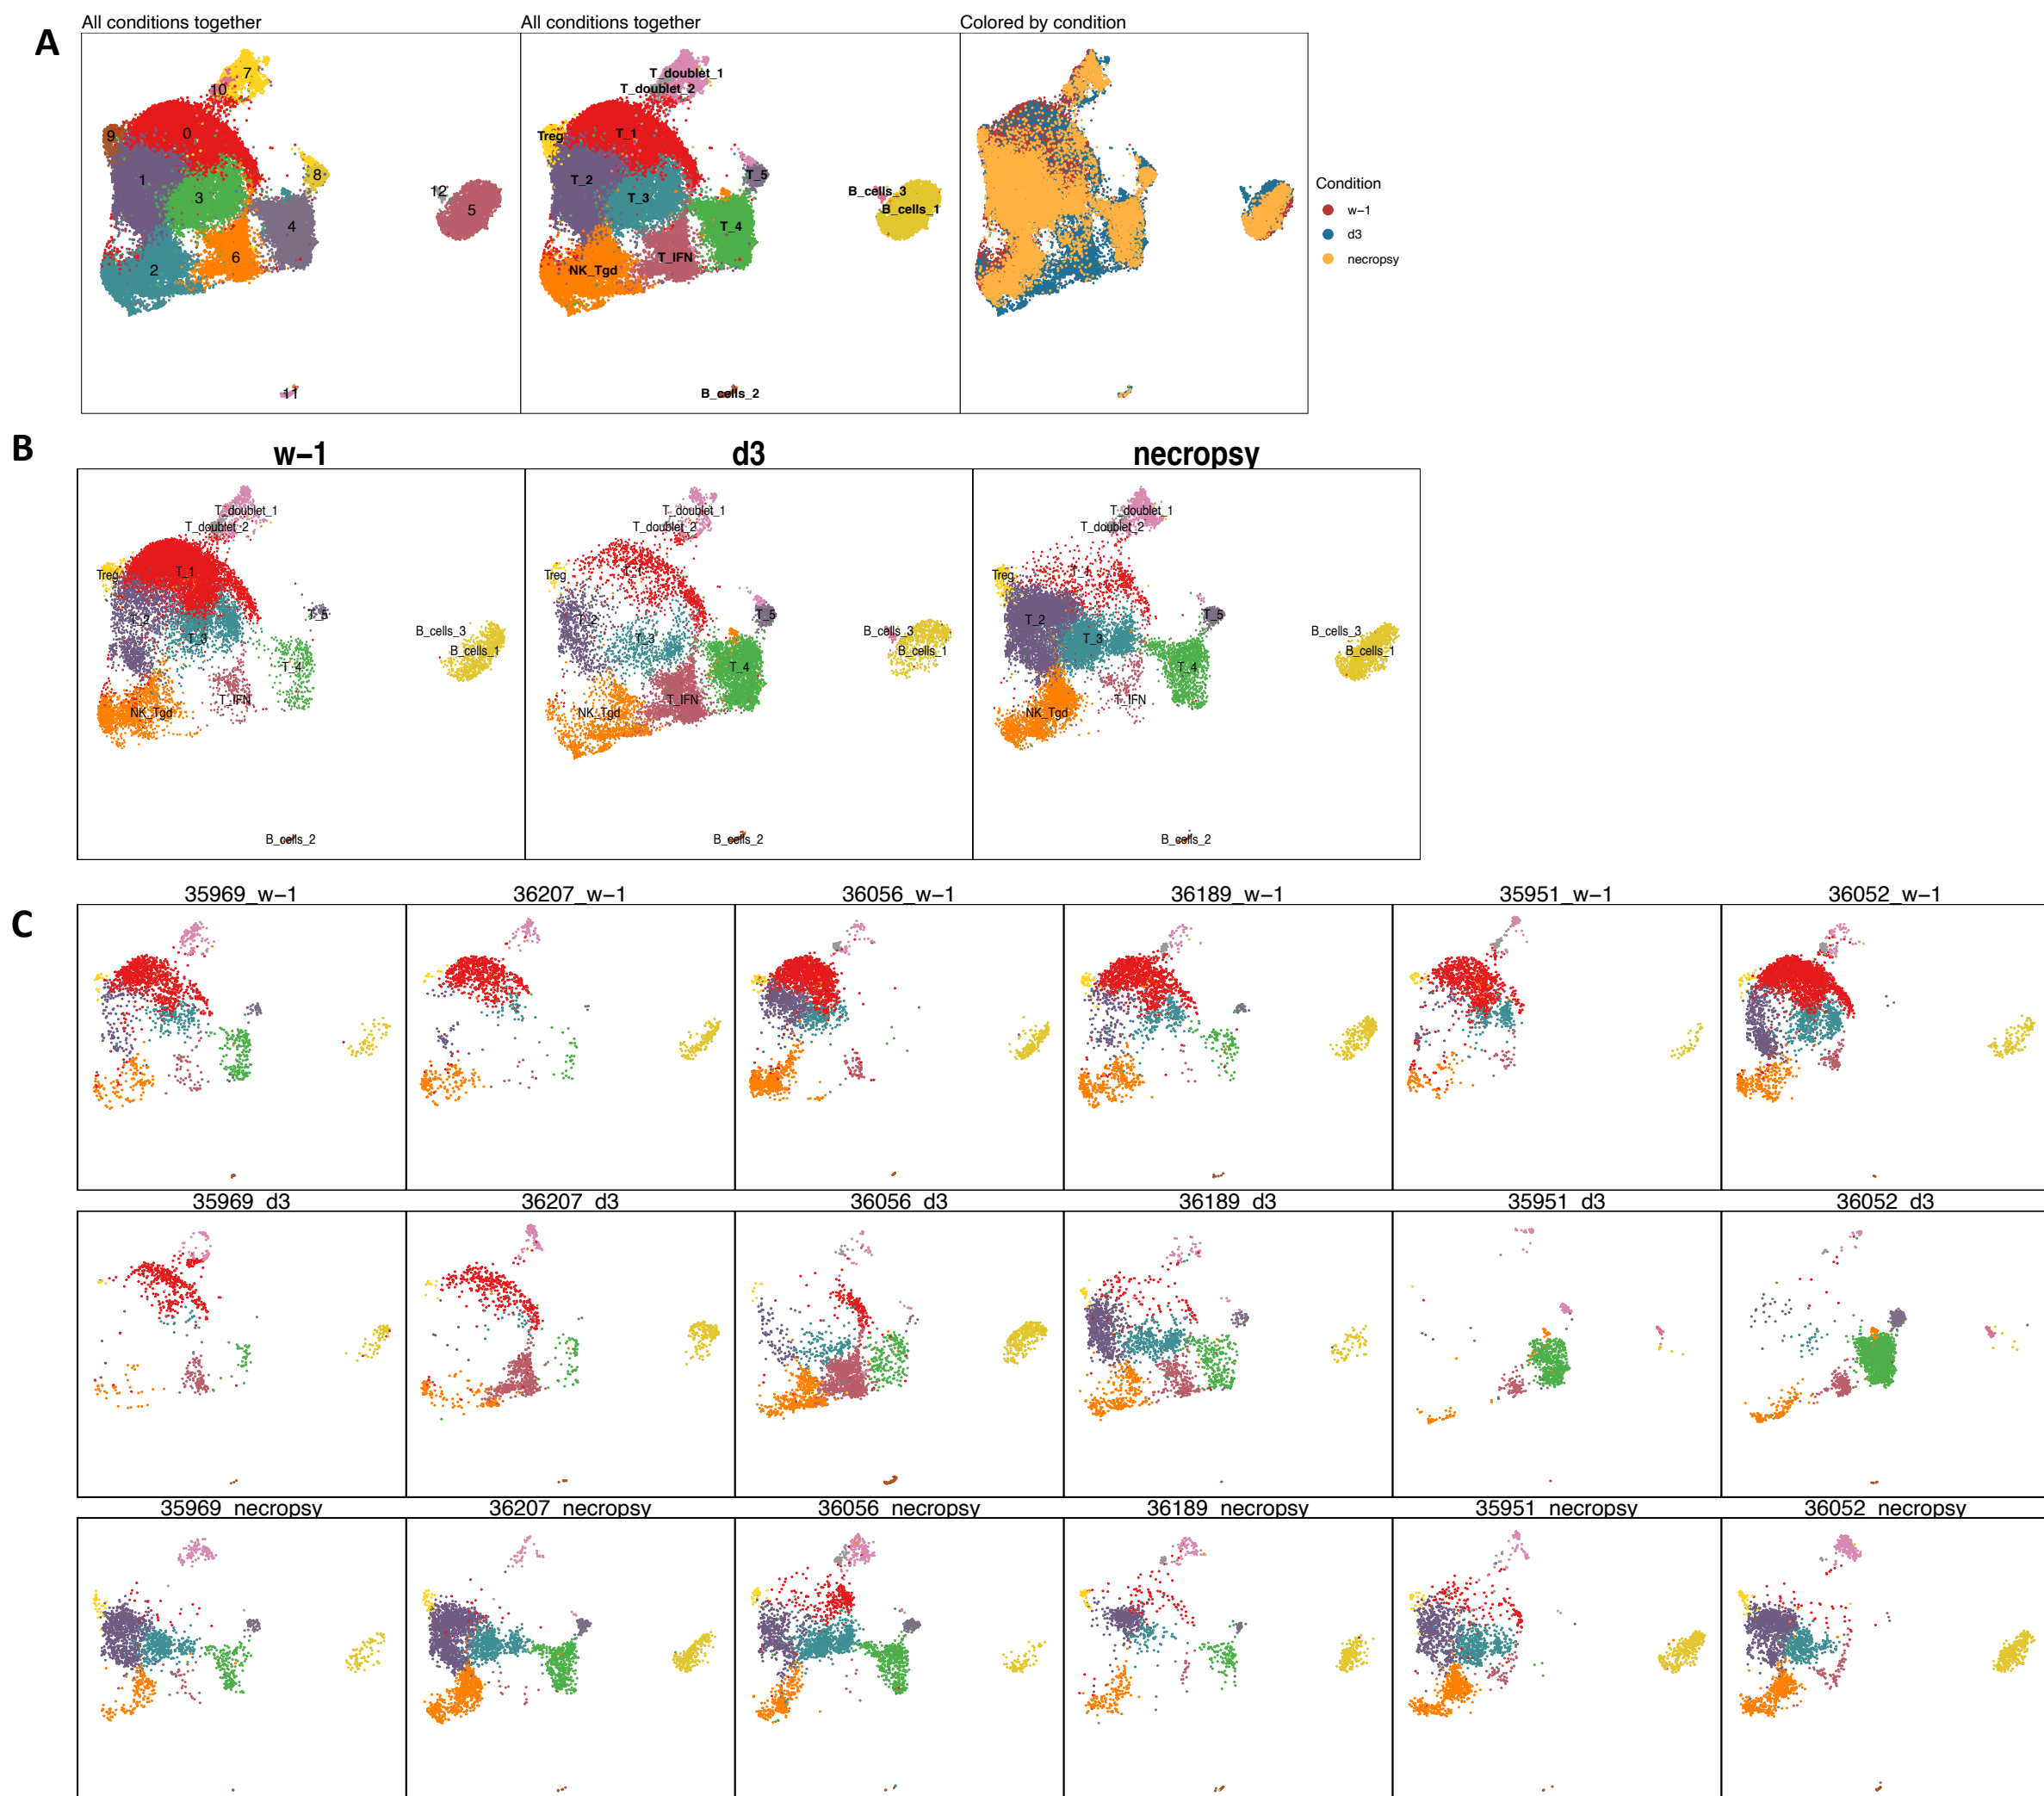

**Supplementary Figure 19.** (A) UMAP plots depicting all lymphoid clusters (left), cluster annotations (middle), distribution as per condition (right), (B) respective timepoints. and (C) distribution per sample.

## Supplementary Figure 20

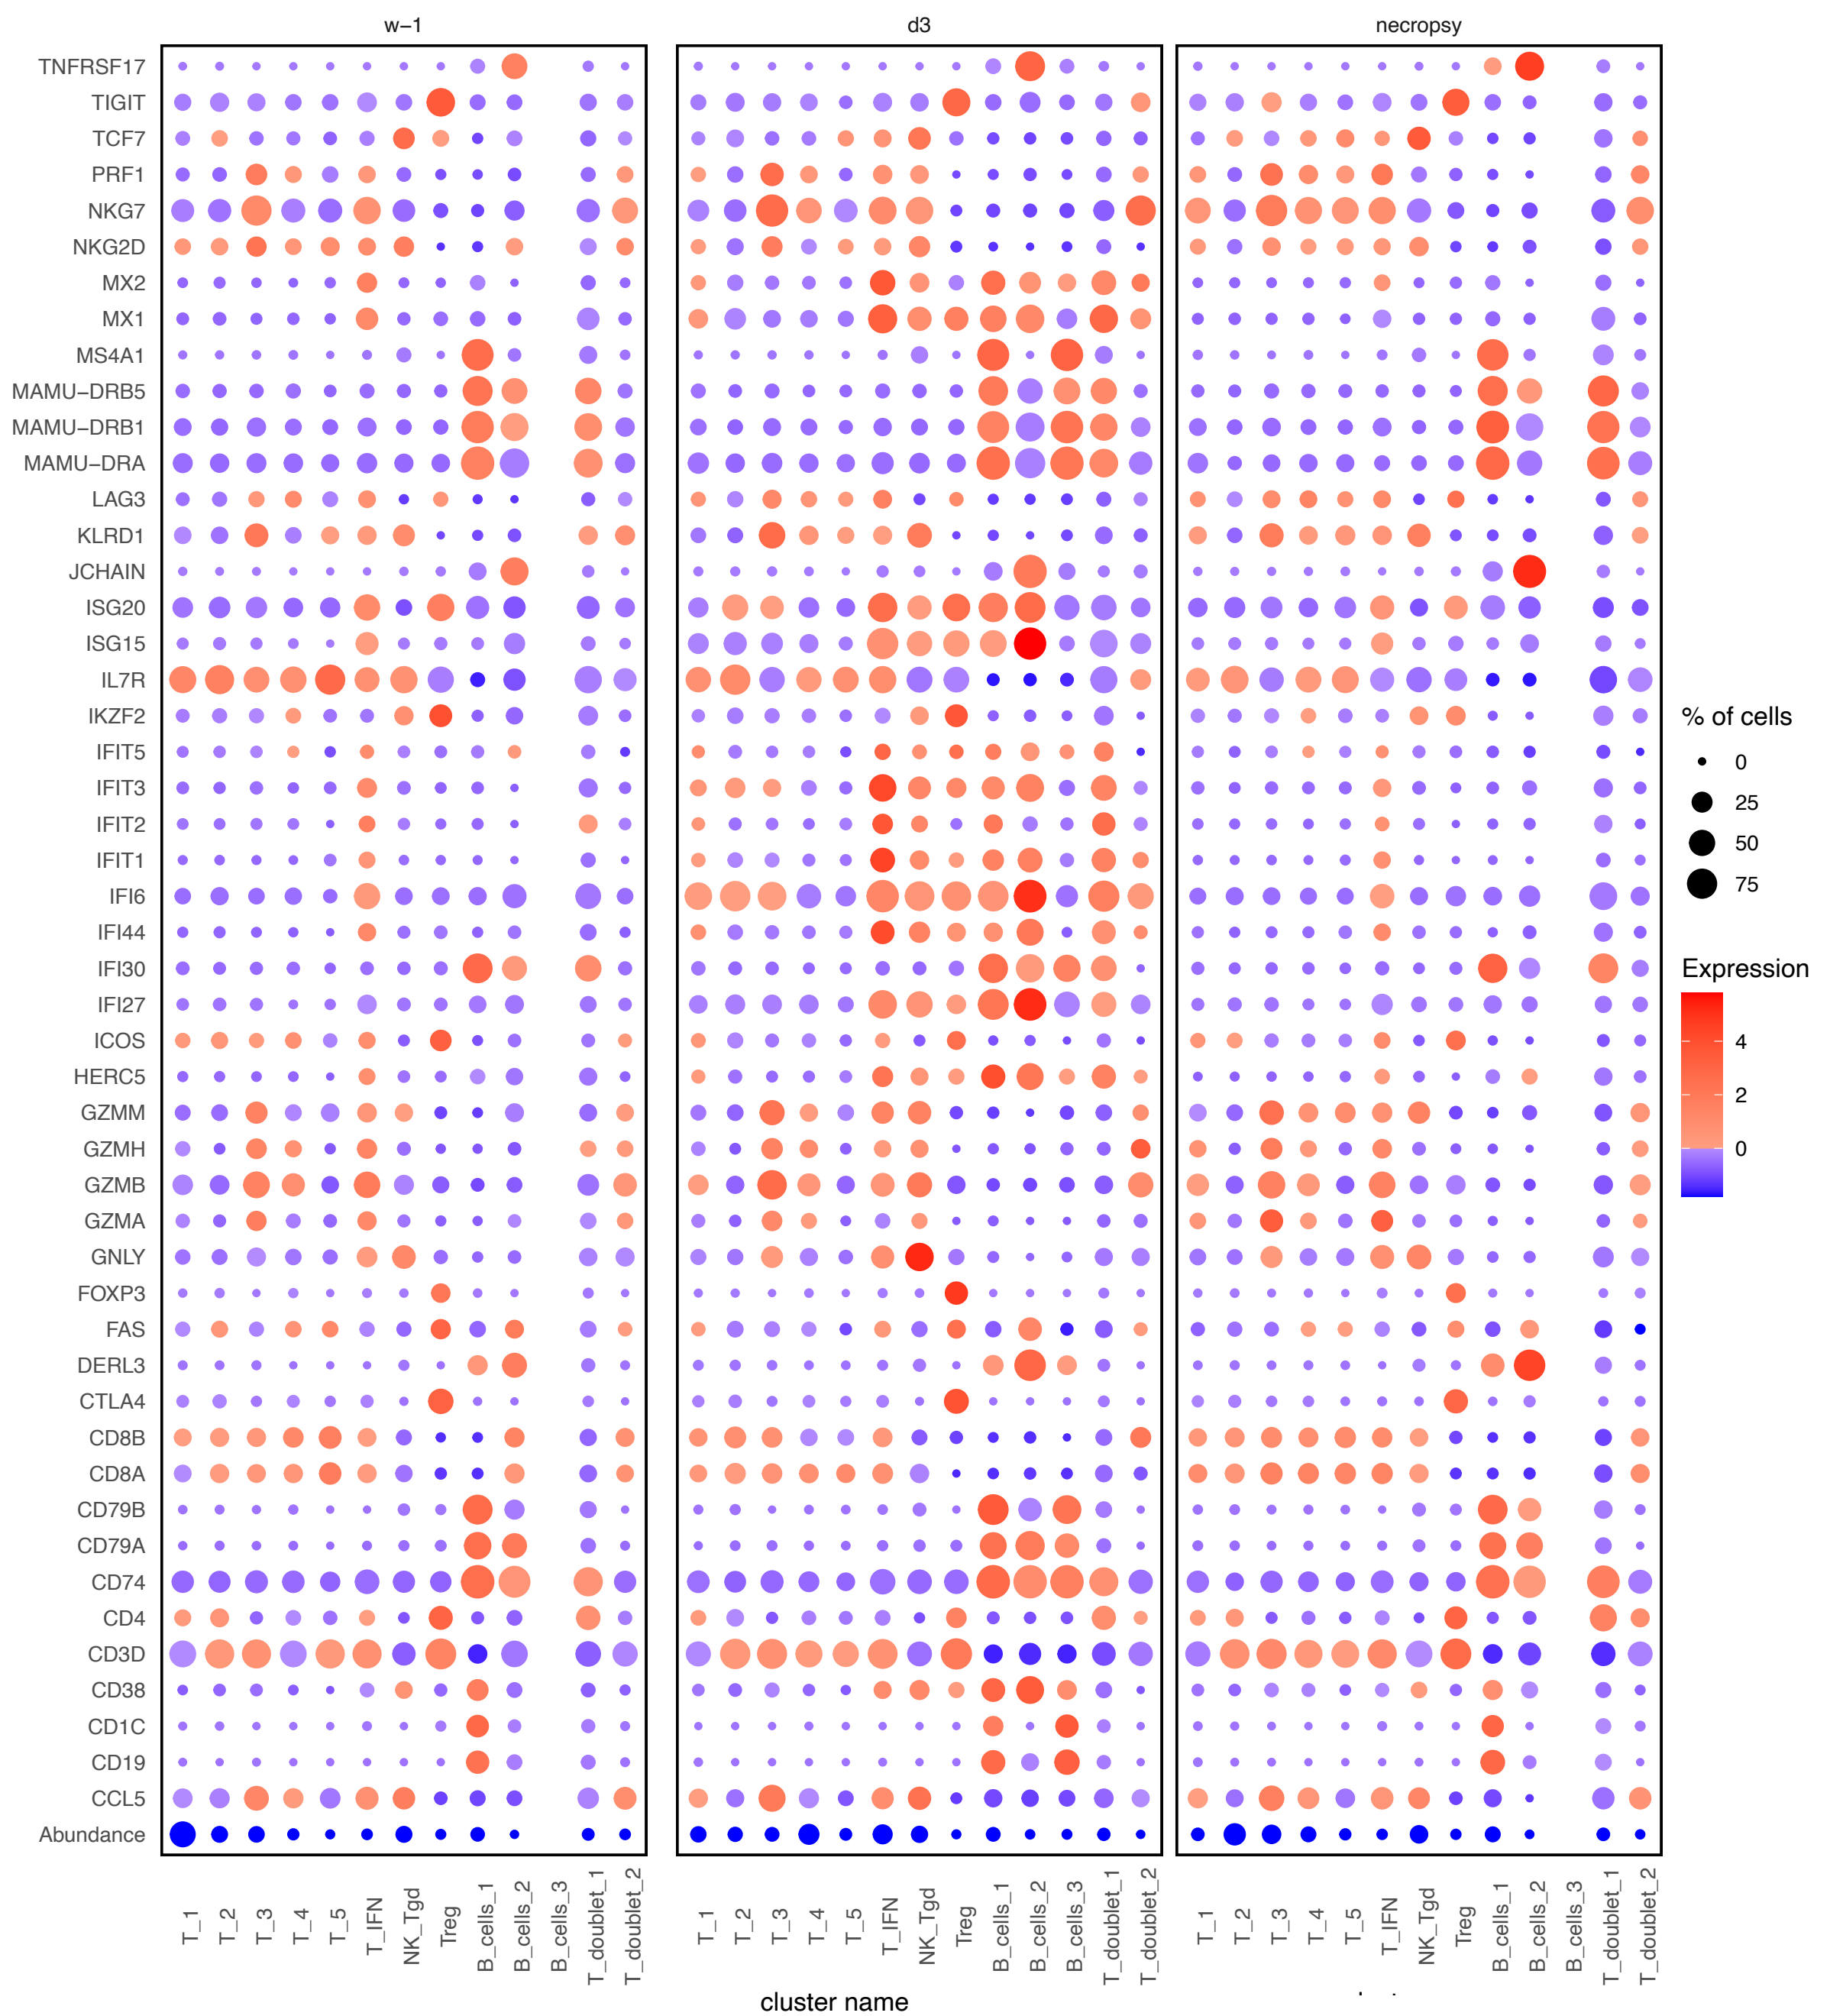

**Supplementary Figure 20.** Bubble plot showing the fractional abundance of identified lymphoid clusters (bottom row), fold change of genes and the fraction of cells expressing the gene of interest in different phases of COVID-19.

### Supplementary Figure 21

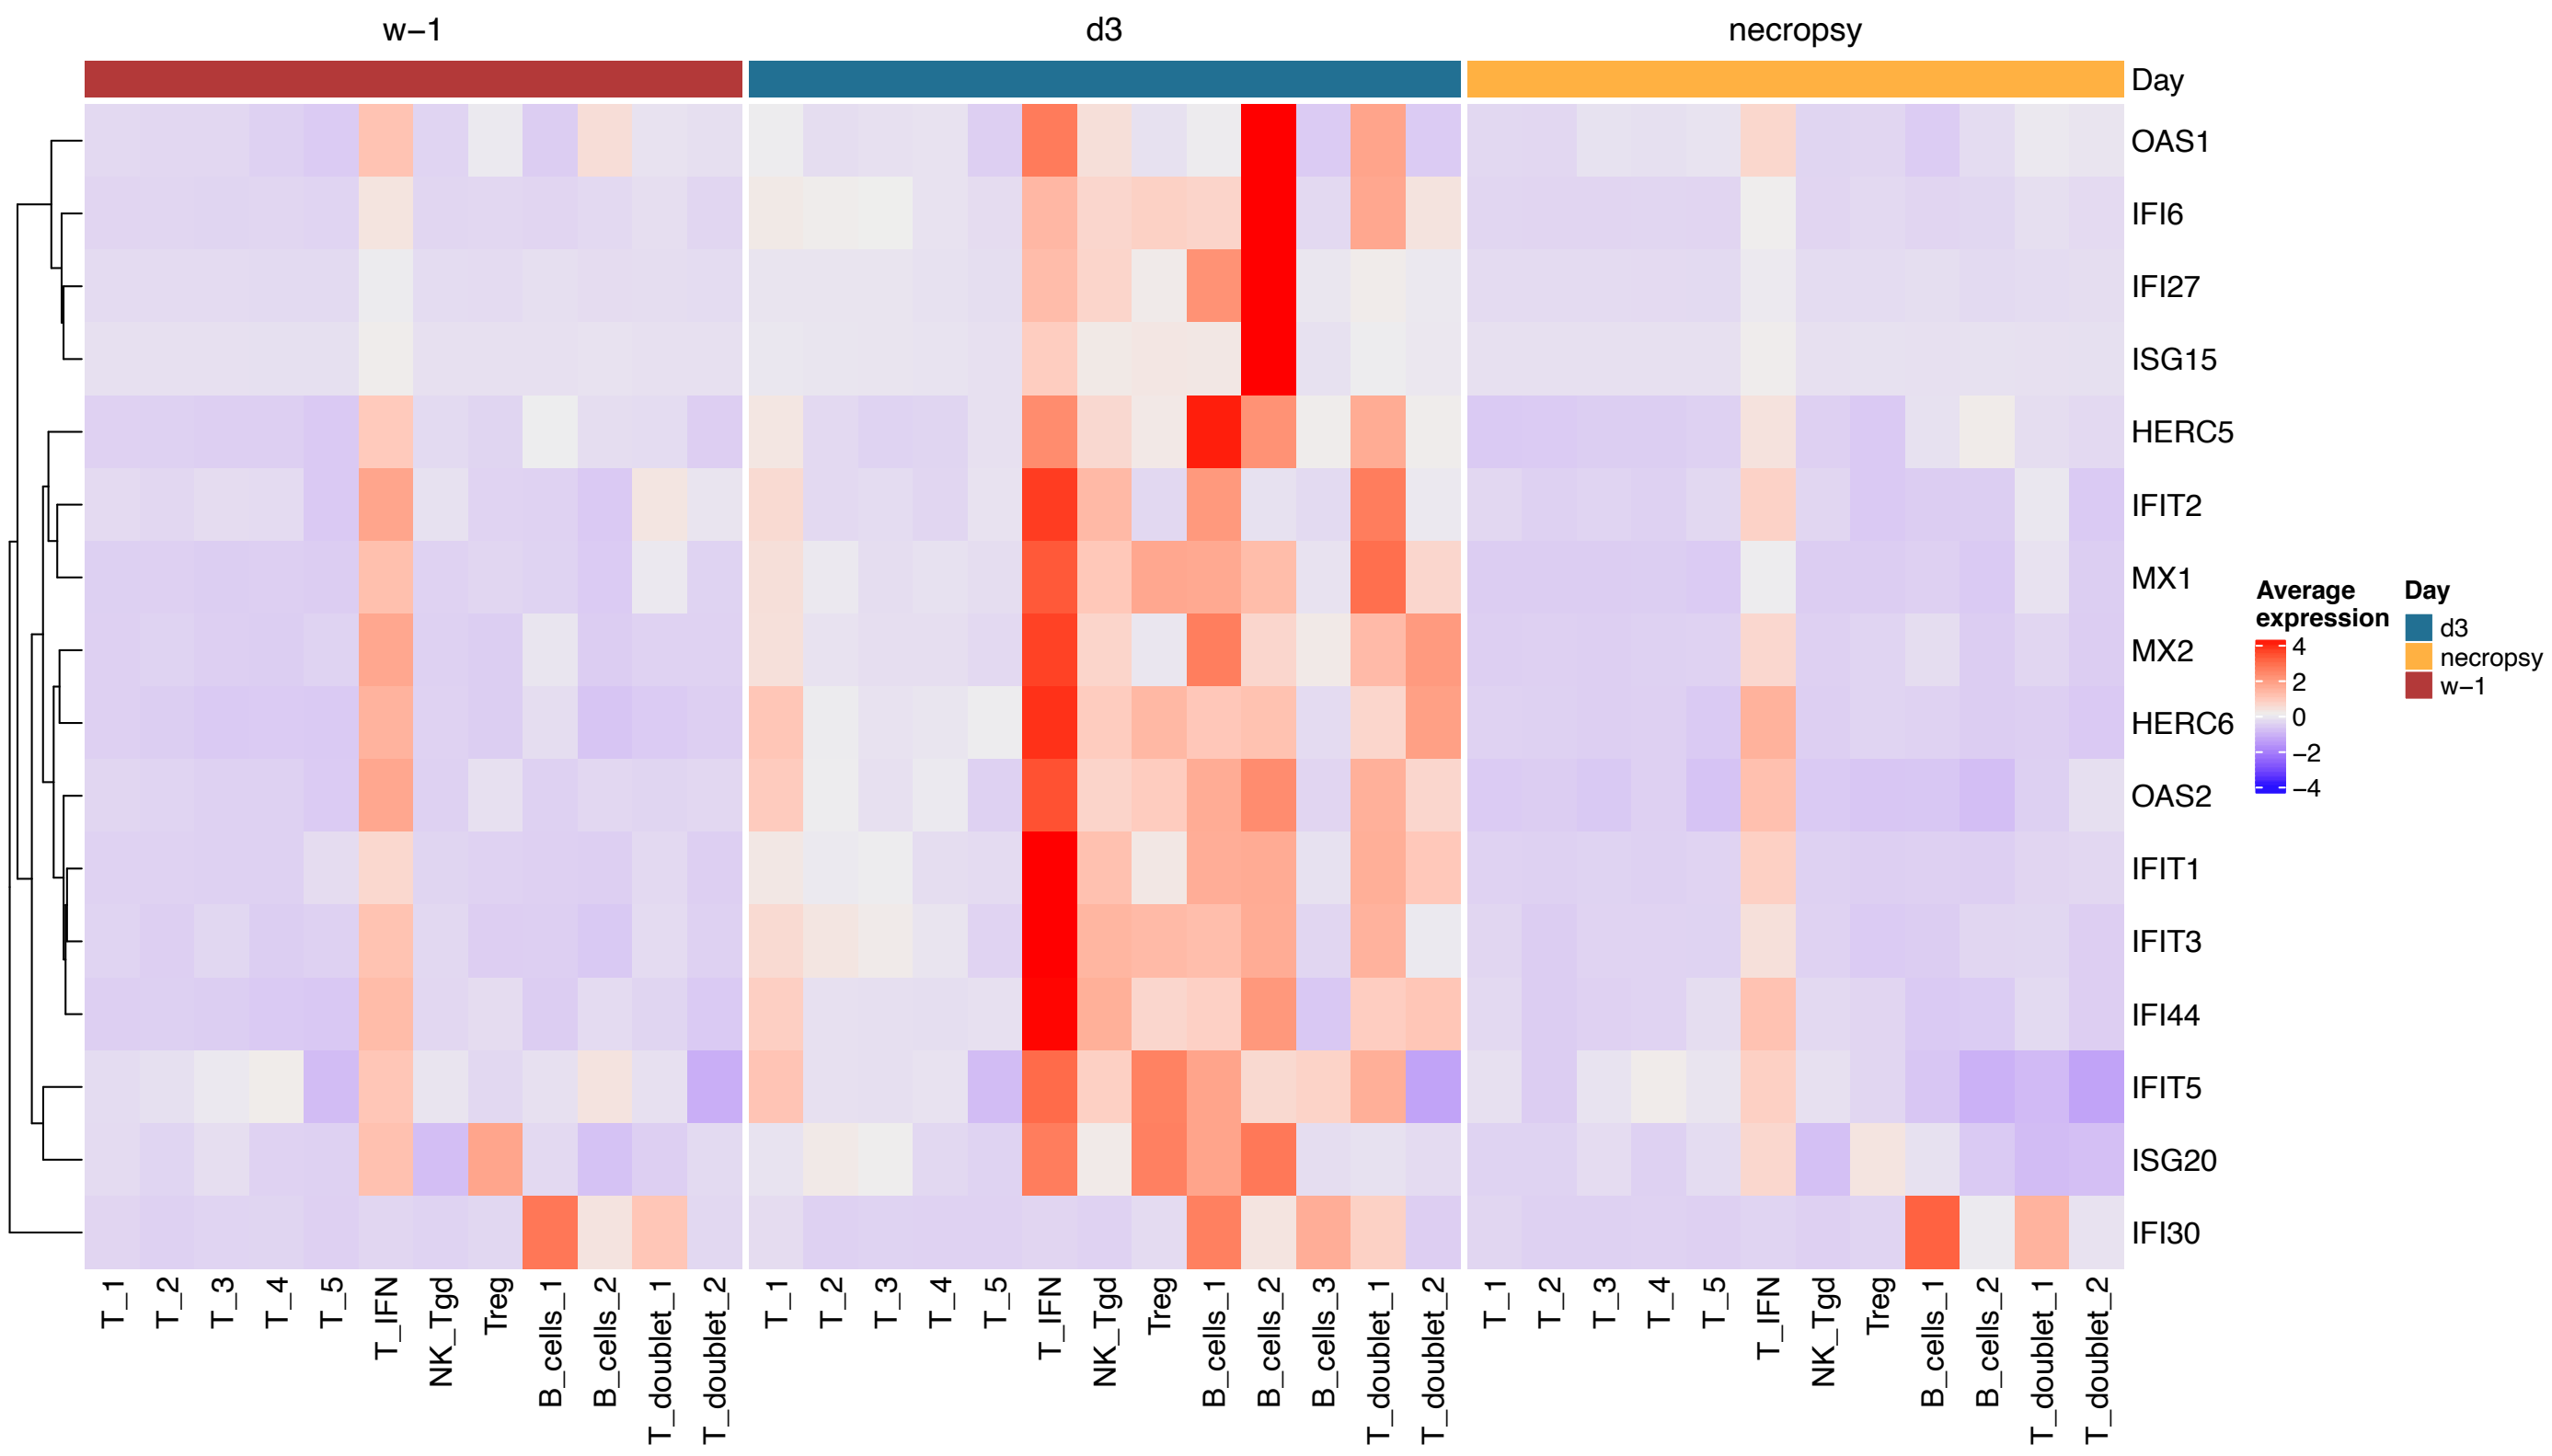

**Supplementary Figure 21.** Heatmap representing differential expression of genes of interest in identified lymphoid clusters in different phases of COVID-19.

Supplementary Figure 22

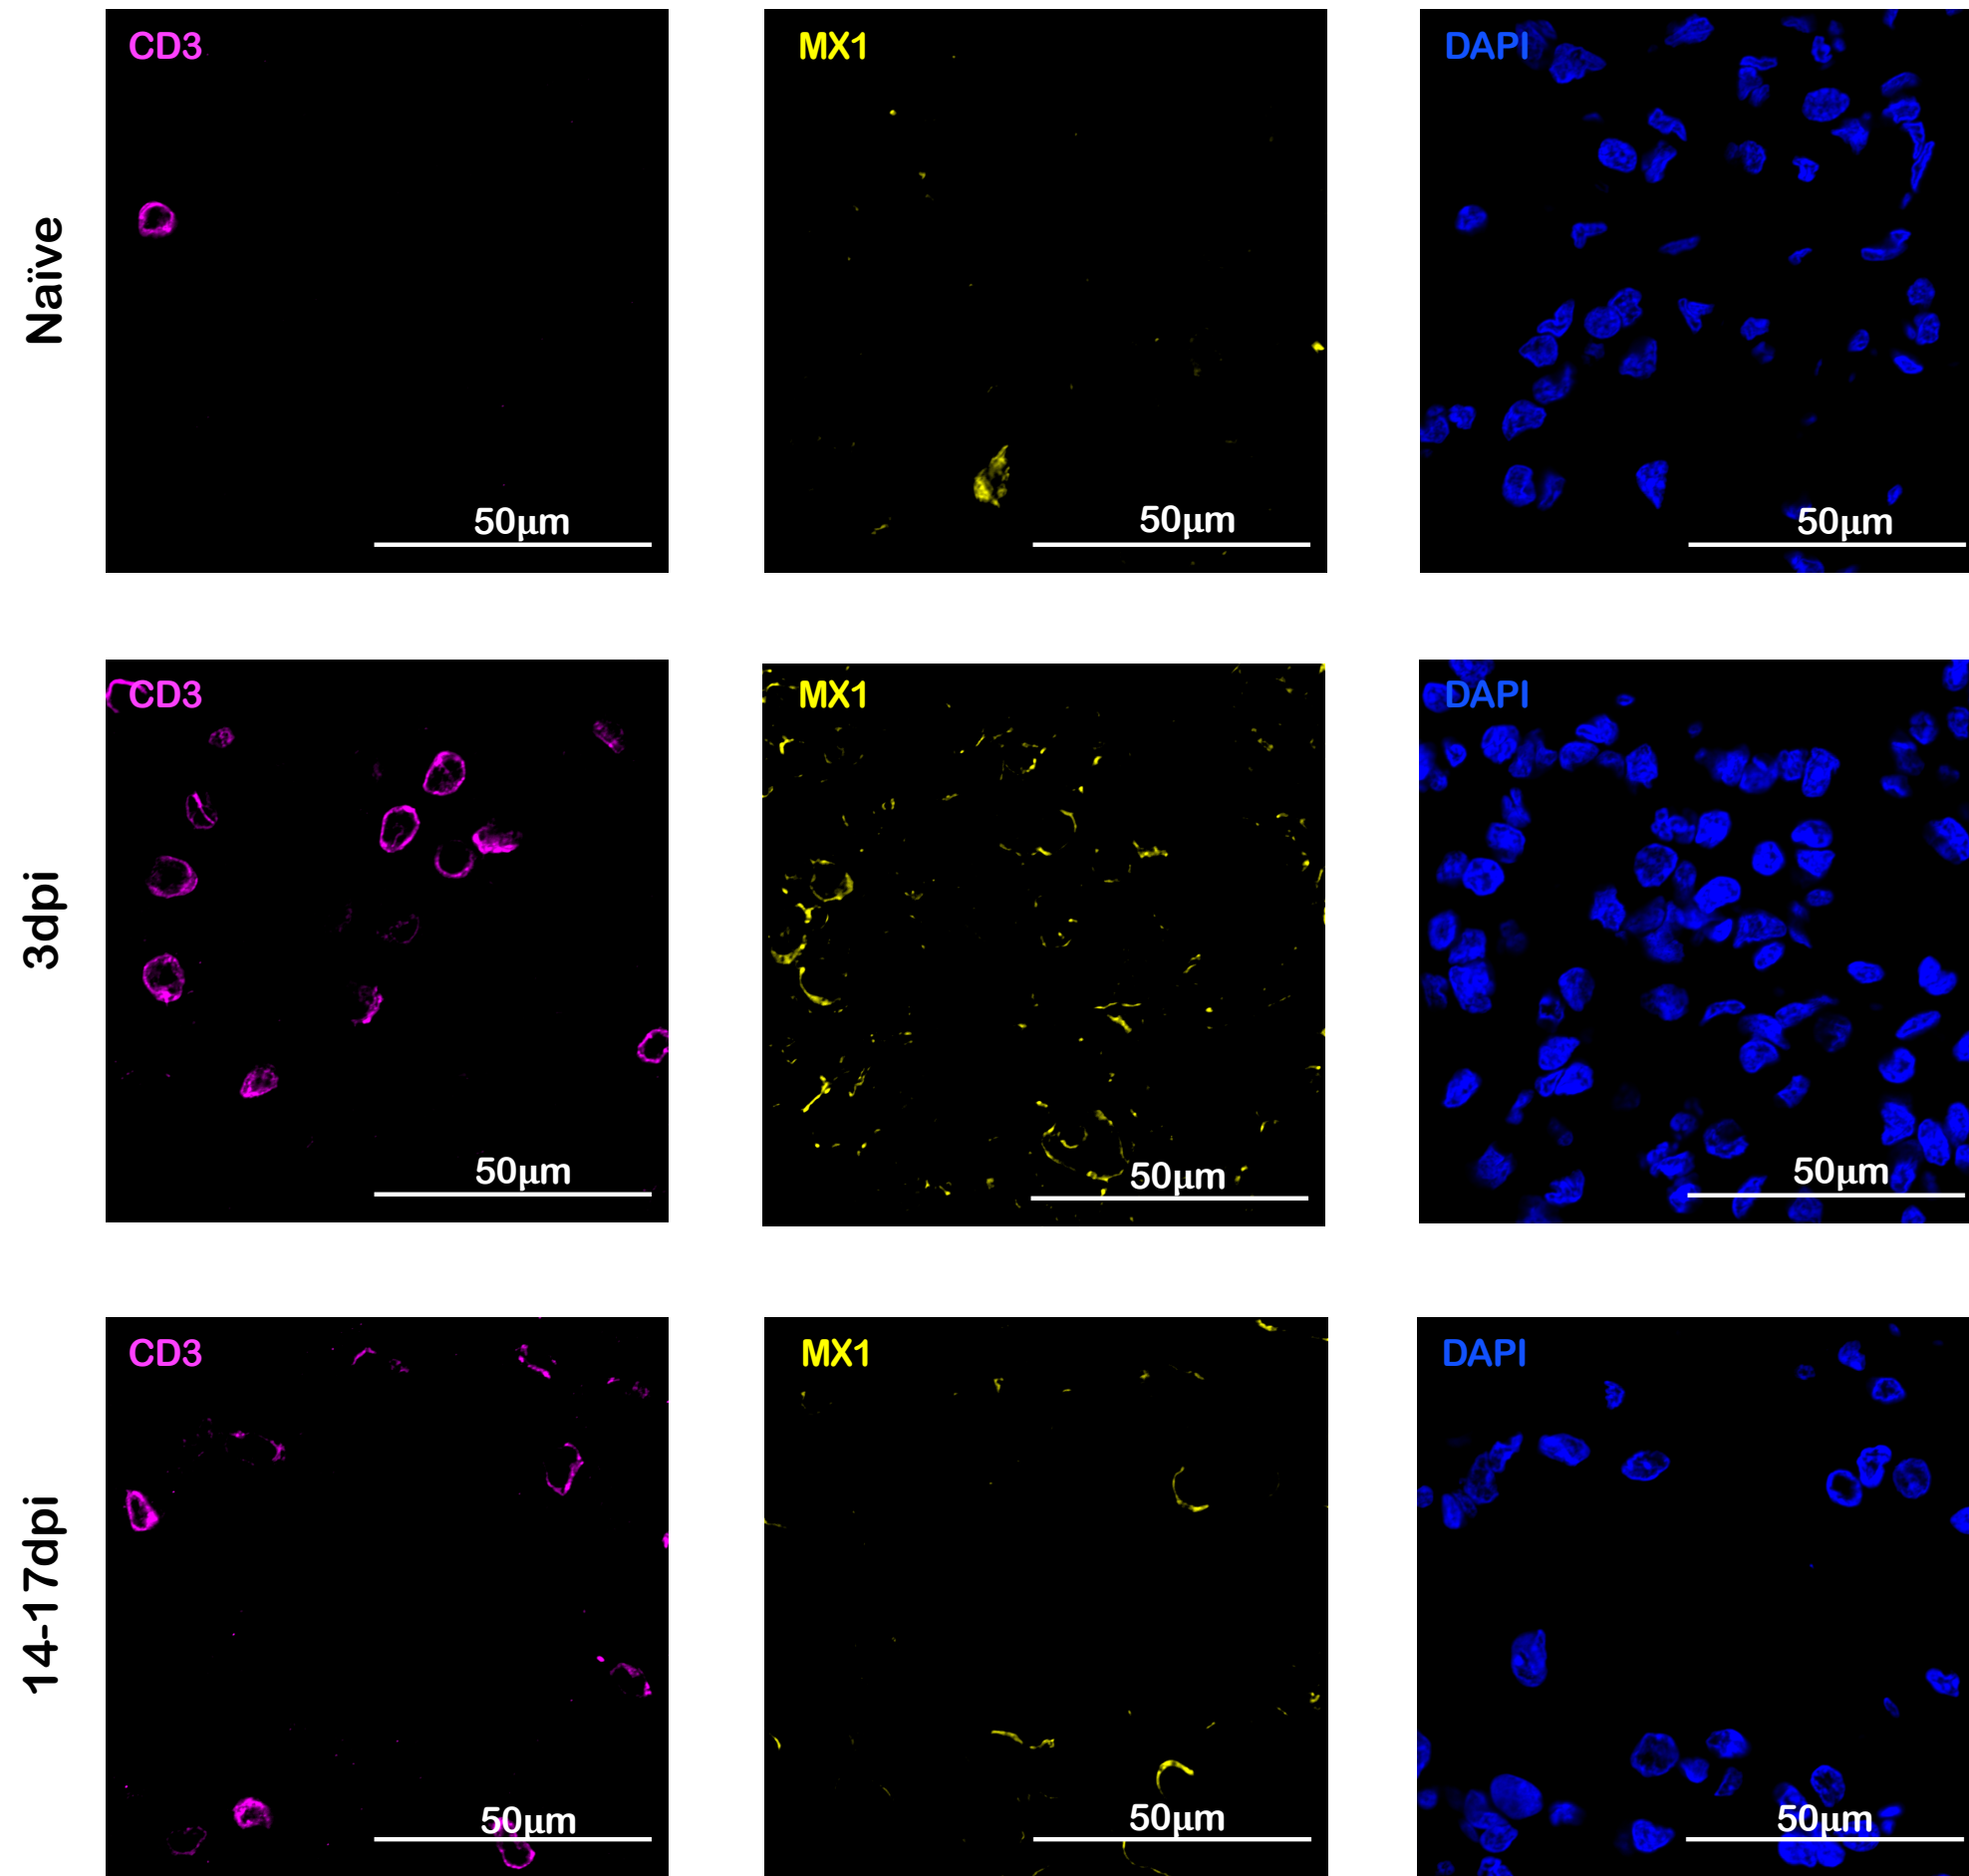

**Supplementary Figure 22.** Images showing single channels from CD3 (magenta) and MX1 (yellow) stained lungs sections from Naïve and SARS CoV-2 infected macaques at Day 3 and Day 14 post-infection.

### Supplementary Figure 23

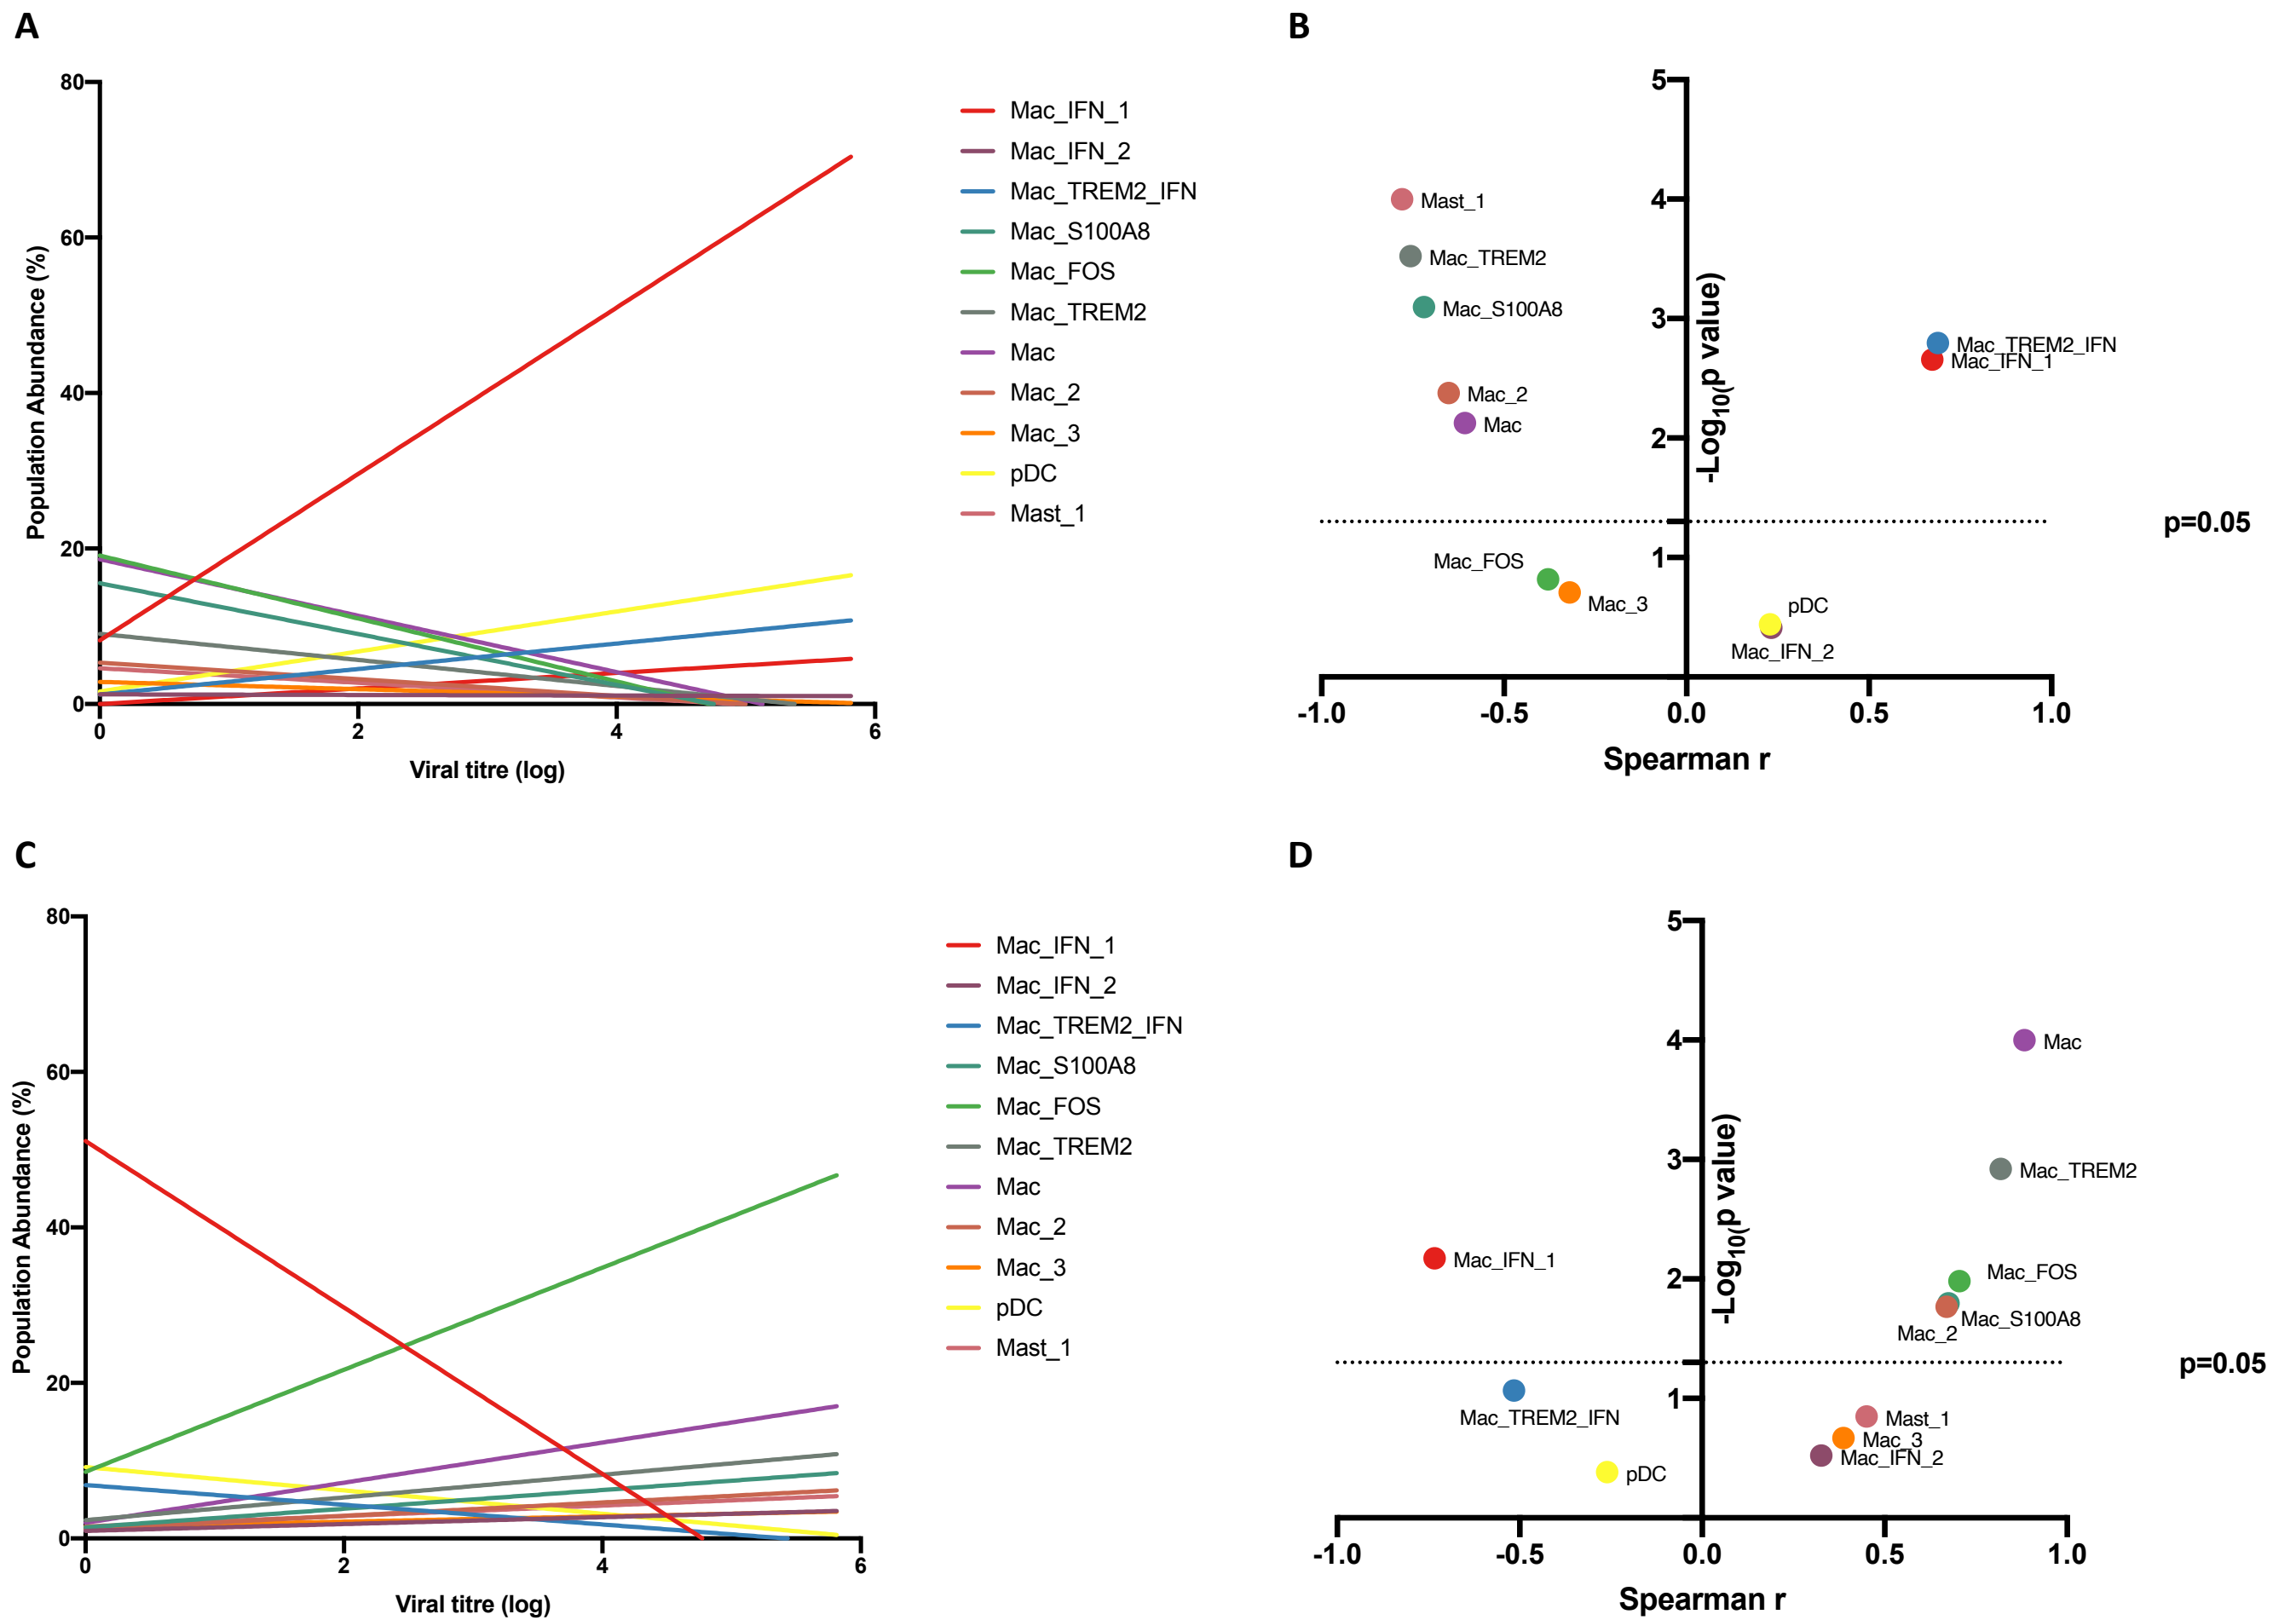

**Supplementary Figure 23.** (A) Correlation curves depicting trends between fraction of cellular subsets and Log<sub>10</sub> viral titers in BAL at the same time point. (B) Plot depicting Spearman correlation coefficient and associated p values. (C) Correlation curves depicting trends between fraction of cellular subsets and Log<sub>10</sub> viral titers in BAL at the subsequent time point. (D) Plot depicting Spearman correlation coefficient and associated p values.



**Supplementary Table 1: List of animals and demographics.**

| <b>Annotated ID</b> | <b>Species</b> | <b>Common name</b> | <b>Gender</b> | <b>Age (Year and Days)</b> | <b>Weight (kg)</b> |
|---------------------|----------------|--------------------|---------------|----------------------------|--------------------|
| MM09                | Macaca mulatta | Rhesus monkey      | Male          | 3 years, 350 days          | 6                  |
| MM10                | Macaca mulatta | Rhesus monkey      | Male          | 3 years, 343 days          | 6.5                |
| MM11                | Macaca mulatta | Rhesus monkey      | Female        | 3 years, 323 days          | 5.84               |
| MM12                | Macaca mulatta | Rhesus monkey      | Female        | 3 years, 324 days          | 4.44               |
| MM14                | Macaca mulatta | Rhesus monkey      | Female        | 3 years, 269 days          | 5.7                |
| MM15                | Macaca mulatta | Rhesus monkey      | Male          | 3 years, 258 days          | 5.72               |
| MM13                | Macaca mulatta | Rhesus monkey      | Female        | 3 years, 316 days          | 4.21               |
| MM16                | Macaca mulatta | Rhesus monkey      | Male          | 3 years, 19 days           | 4.81               |

**Supplementary table 2: Number of cells analyzed for pan-CD45 clusters across the sampled timepoints.**

| <b>Cluster_new</b> | <b>Cells_count</b> |
|--------------------|--------------------|
| Mac_IFN            | 32984              |
| Mac_IFN_2          | 1613               |
| Mac_IFN_3          | 165                |
| Mac_MARCO_1        | 27440              |
| Mac_MARCO_2        | 27362              |
| Mac_MARCO_3        | 6110               |
| Mac_MARCO_4        | 5636               |
| Mac_TREM2          | 7400               |
| Mac_TREM2_IFN      | 4412               |
| Mac_BIRC3          | 1413               |
| pDC_1              | 5693               |
| pDC_2              | 59                 |
| MAST_cells         | 3525               |
| DC                 | 2583               |
| T_NK_1             | 27812              |
| T_NK_2             | 6105               |
| B_cells            | 3293               |
| 12                 | 2885               |
| Prolif             | 1904               |
| non_imm_1          | 1217               |
| non_imm_2          | 467                |

**Supplementary table 3: Number of cells analyzed for pan-CD45 clusters across the sampled timepoints.**

| <b>Subject</b> | <b>Condition</b> | <b>Cluster_new</b> | <b>Cells_count</b> |
|----------------|------------------|--------------------|--------------------|
| 35951          | w-1              | Mac_IFN            | 20                 |
| 35951          | w-1              | Mac_IFN_3          | 32                 |
| 35951          | w-1              | Mac_MARCO_1        | 205                |

|       |          |               |      |
|-------|----------|---------------|------|
| 35951 | w-1      | Mac_MARCO_2   | 3013 |
| 35951 | w-1      | Mac_MARCO_3   | 296  |
| 35951 | w-1      | Mac_MARCO_4   | 1    |
| 35951 | w-1      | Mac_TREM2     | 416  |
| 35951 | w-1      | Mac_TREM2_IFN | 15   |
| 35951 | w-1      | Mac_BIRC3     | 18   |
| 35951 | w-1      | pDC_1         | 62   |
| 35951 | w-1      | pDC_2         | 2    |
| 35951 | w-1      | MAST_cells    | 565  |
| 35951 | w-1      | DC            | 36   |
| 35951 | w-1      | T_NK_1        | 1279 |
| 35951 | w-1      | T_NK_2        | 147  |
| 35951 | w-1      | B_cells       | 37   |
| 35951 | w-1      | 12            | 49   |
| 35951 | w-1      | Prolif        | 20   |
| 35951 | w-1      | non_imm_1     | 5    |
| 35951 | w-1      | non_imm_2     | 20   |
| 35951 | d3       | Mac_IFN       | 2801 |
| 35951 | d3       | Mac_IFN_2     | 82   |
| 35951 | d3       | Mac_MARCO_1   | 4    |
| 35951 | d3       | Mac_MARCO_2   | 3    |
| 35951 | d3       | Mac_MARCO_3   | 2    |
| 35951 | d3       | Mac_MARCO_4   | 232  |
| 35951 | d3       | Mac_TREM2     | 11   |
| 35951 | d3       | Mac_TREM2_IFN | 304  |
| 35951 | d3       | Mac_BIRC3     | 40   |
| 35951 | d3       | pDC_1         | 11   |
| 35951 | d3       | pDC_2         | 4    |
| 35951 | d3       | MAST_cells    | 450  |
| 35951 | d3       | DC            | 164  |
| 35951 | d3       | T_NK_1        | 685  |
| 35951 | d3       | T_NK_2        | 57   |
| 35951 | d3       | B_cells       | 38   |
| 35951 | d3       | 12            | 98   |
| 35951 | d3       | Prolif        | 20   |
| 35951 | d3       | non_imm_1     | 17   |
| 35951 | d3       | non_imm_2     | 20   |
| 35951 | necropsy | Mac_IFN       | 3    |
| 35951 | necropsy | Mac_IFN_3     | 11   |
| 35951 | necropsy | Mac_MARCO_1   | 1474 |
| 35951 | necropsy | Mac_MARCO_2   | 31   |

|       |          |               |      |
|-------|----------|---------------|------|
| 35951 | necropsy | Mac_MARCO_3   | 37   |
| 35951 | necropsy | Mac_MARCO_4   | 414  |
| 35951 | necropsy | Mac_TREM2     | 209  |
| 35951 | necropsy | Mac_TREM2_IFN | 21   |
| 35951 | necropsy | Mac_BIRC3     | 28   |
| 35951 | necropsy | pDC_1         | 39   |
| 35951 | necropsy | pDC_2         | 10   |
| 35951 | necropsy | MAST_cells    | 575  |
| 35951 | necropsy | DC            | 92   |
| 35951 | necropsy | T_NK_1        | 1200 |
| 35951 | necropsy | T_NK_2        | 558  |
| 35951 | necropsy | B_cells       | 345  |
| 35951 | necropsy | 12            | 112  |
| 35951 | necropsy | Prolif        | 47   |
| 35951 | necropsy | non_imm_1     | 13   |
| 35951 | necropsy | non_imm_2     | 2    |
| 35969 | w-1      | Mac_IFN       | 283  |
| 35969 | w-1      | Mac_IFN_2     | 28   |
| 35969 | w-1      | Mac_MARCO_1   | 161  |
| 35969 | w-1      | Mac_MARCO_2   | 4680 |
| 35969 | w-1      | Mac_MARCO_3   | 1452 |
| 35969 | w-1      | Mac_MARCO_4   | 23   |
| 35969 | w-1      | Mac_TREM2     | 502  |
| 35969 | w-1      | Mac_TREM2_IFN | 247  |
| 35969 | w-1      | Mac_BIRC3     | 34   |
| 35969 | w-1      | pDC_1         | 263  |
| 35969 | w-1      | pDC_2         | 3    |
| 35969 | w-1      | MAST_cells    | 131  |
| 35969 | w-1      | DC            | 83   |
| 35969 | w-1      | T_NK_1        | 1571 |
| 35969 | w-1      | T_NK_2        | 180  |
| 35969 | w-1      | B_cells       | 69   |
| 35969 | w-1      | 12            | 151  |
| 35969 | w-1      | Prolif        | 113  |
| 35969 | w-1      | non_imm_1     | 86   |
| 35969 | w-1      | non_imm_2     | 76   |
| 35969 | d3       | Mac_IFN       | 6301 |
| 35969 | d3       | Mac_IFN_2     | 245  |
| 35969 | d3       | Mac_MARCO_1   | 28   |
| 35969 | d3       | Mac_MARCO_2   | 1293 |
| 35969 | d3       | Mac_MARCO_3   | 38   |

|       |          |               |      |
|-------|----------|---------------|------|
| 35969 | d3       | Mac_MARCO_4   | 75   |
| 35969 | d3       | Mac_TREM2     | 181  |
| 35969 | d3       | Mac_TREM2_IFN | 94   |
| 35969 | d3       | Mac_BIRC3     | 12   |
| 35969 | d3       | pDC_1         | 88   |
| 35969 | d3       | pDC_2         | 2    |
| 35969 | d3       | MAST_cells    | 35   |
| 35969 | d3       | DC            | 24   |
| 35969 | d3       | T_NK_1        | 575  |
| 35969 | d3       | T_NK_2        | 47   |
| 35969 | d3       | B_cells       | 79   |
| 35969 | d3       | 12            | 134  |
| 35969 | d3       | Prolif        | 109  |
| 35969 | d3       | non_imm_1     | 60   |
| 35969 | d3       | non_imm_2     | 11   |
| 35969 | necropsy | Mac_IFN       | 28   |
| 35969 | necropsy | Mac_MARCO_1   | 3877 |
| 35969 | necropsy | Mac_MARCO_2   | 66   |
| 35969 | necropsy | Mac_MARCO_3   | 37   |
| 35969 | necropsy | Mac_MARCO_4   | 847  |
| 35969 | necropsy | Mac_TREM2     | 408  |
| 35969 | necropsy | Mac_TREM2_IFN | 49   |
| 35969 | necropsy | Mac_BIRC3     | 24   |
| 35969 | necropsy | pDC_1         | 36   |
| 35969 | necropsy | pDC_2         | 7    |
| 35969 | necropsy | MAST_cells    | 150  |
| 35969 | necropsy | DC            | 192  |
| 35969 | necropsy | T_NK_1        | 1591 |
| 35969 | necropsy | T_NK_2        | 155  |
| 35969 | necropsy | B_cells       | 95   |
| 35969 | necropsy | 12            | 31   |
| 35969 | necropsy | Prolif        | 122  |
| 35969 | necropsy | non_imm_1     | 49   |
| 35969 | necropsy | non_imm_2     | 1    |
| 36052 | w-1      | Mac_IFN       | 2    |
| 36052 | w-1      | Mac_IFN_3     | 67   |
| 36052 | w-1      | Mac_MARCO_1   | 112  |
| 36052 | w-1      | Mac_MARCO_2   | 4212 |
| 36052 | w-1      | Mac_MARCO_3   | 1380 |
| 36052 | w-1      | Mac_MARCO_4   | 37   |
| 36052 | w-1      | Mac_TREM2     | 309  |

|       |          |               |       |
|-------|----------|---------------|-------|
| 36052 | w-1      | Mac_TREM2_IFN | 49    |
| 36052 | w-1      | Mac_BIRC3     | 42    |
| 36052 | w-1      | pDC_1         | 27    |
| 36052 | w-1      | MAST_cells    | 146   |
| 36052 | w-1      | DC            | 64    |
| 36052 | w-1      | T_NK_1        | 3275  |
| 36052 | w-1      | T_NK_2        | 335   |
| 36052 | w-1      | B_cells       | 147   |
| 36052 | w-1      | 12            | 75    |
| 36052 | w-1      | Prolif        | 101   |
| 36052 | w-1      | non_imm_1     | 216   |
| 36052 | w-1      | non_imm_2     | 50    |
| 36052 | d3       | Mac_IFN       | 11667 |
| 36052 | d3       | Mac_IFN_2     | 814   |
| 36052 | d3       | Mac_MARCO_1   | 6     |
| 36052 | d3       | Mac_MARCO_2   | 17    |
| 36052 | d3       | Mac_MARCO_3   | 2     |
| 36052 | d3       | Mac_MARCO_4   | 172   |
| 36052 | d3       | Mac_TREM2     | 50    |
| 36052 | d3       | Mac_TREM2_IFN | 583   |
| 36052 | d3       | Mac_BIRC3     | 37    |
| 36052 | d3       | pDC_1         | 105   |
| 36052 | d3       | MAST_cells    | 154   |
| 36052 | d3       | DC            | 161   |
| 36052 | d3       | T_NK_1        | 1859  |
| 36052 | d3       | T_NK_2        | 271   |
| 36052 | d3       | B_cells       | 109   |
| 36052 | d3       | 12            | 87    |
| 36052 | d3       | Prolif        | 202   |
| 36052 | d3       | non_imm_1     | 194   |
| 36052 | d3       | non_imm_2     | 118   |
| 36052 | necropsy | Mac_IFN       | 12    |
| 36052 | necropsy | Mac_IFN_2     | 1     |
| 36052 | necropsy | Mac_IFN_3     | 55    |
| 36052 | necropsy | Mac_MARCO_1   | 7268  |
| 36052 | necropsy | Mac_MARCO_2   | 1960  |
| 36052 | necropsy | Mac_MARCO_3   | 39    |
| 36052 | necropsy | Mac_MARCO_4   | 697   |
| 36052 | necropsy | Mac_TREM2     | 894   |
| 36052 | necropsy | Mac_TREM2_IFN | 130   |
| 36052 | necropsy | Mac_BIRC3     | 92    |

|       |          |               |      |
|-------|----------|---------------|------|
| 36052 | necropsy | pDC_1         | 77   |
| 36052 | necropsy | MAST_cells    | 258  |
| 36052 | necropsy | DC            | 319  |
| 36052 | necropsy | T_NK_1        | 1569 |
| 36052 | necropsy | T_NK_2        | 460  |
| 36052 | necropsy | B_cells       | 442  |
| 36052 | necropsy | 12            | 144  |
| 36052 | necropsy | Prolif        | 188  |
| 36052 | necropsy | non_imm_1     | 34   |
| 36052 | necropsy | non_imm_2     | 11   |
| 36056 | w-1      | Mac_IFN       | 738  |
| 36056 | w-1      | Mac_IFN_2     | 4    |
| 36056 | w-1      | Mac_MARCO_1   | 44   |
| 36056 | w-1      | Mac_MARCO_2   | 5036 |
| 36056 | w-1      | Mac_MARCO_3   | 806  |
| 36056 | w-1      | Mac_MARCO_4   | 3    |
| 36056 | w-1      | Mac_TREM2     | 927  |
| 36056 | w-1      | Mac_TREM2_IFN | 15   |
| 36056 | w-1      | Mac_BIRC3     | 62   |
| 36056 | w-1      | pDC_1         | 48   |
| 36056 | w-1      | MAST_cells    | 254  |
| 36056 | w-1      | DC            | 179  |
| 36056 | w-1      | T_NK_1        | 2219 |
| 36056 | w-1      | T_NK_2        | 515  |
| 36056 | w-1      | B_cells       | 212  |
| 36056 | w-1      | 12            | 52   |
| 36056 | w-1      | Prolif        | 174  |
| 36056 | w-1      | non_imm_1     | 88   |
| 36056 | w-1      | non_imm_2     | 36   |
| 36056 | d3       | Mac_IFN       | 1094 |
| 36056 | d3       | Mac_IFN_2     | 104  |
| 36056 | d3       | Mac_MARCO_1   | 33   |
| 36056 | d3       | Mac_MARCO_2   | 3    |
| 36056 | d3       | Mac_MARCO_3   | 6    |
| 36056 | d3       | Mac_MARCO_4   | 130  |
| 36056 | d3       | Mac_TREM2     | 43   |
| 36056 | d3       | Mac_TREM2_IFN | 1844 |
| 36056 | d3       | Mac_BIRC3     | 475  |
| 36056 | d3       | pDC_1         | 4142 |
| 36056 | d3       | MAST_cells    | 26   |
| 36056 | d3       | DC            | 213  |

|       |          |               |      |
|-------|----------|---------------|------|
| 36056 | d3       | T_NK_1        | 1536 |
| 36056 | d3       | T_NK_2        | 694  |
| 36056 | d3       | B_cells       | 412  |
| 36056 | d3       | 12            | 283  |
| 36056 | d3       | Prolif        | 83   |
| 36056 | d3       | non_imm_1     | 30   |
| 36056 | d3       | non_imm_2     | 20   |
| 36056 | necropsy | Mac_IFN       | 1218 |
| 36056 | necropsy | Mac_IFN_2     | 16   |
| 36056 | necropsy | Mac_MARCO_1   | 5319 |
| 36056 | necropsy | Mac_MARCO_2   | 92   |
| 36056 | necropsy | Mac_MARCO_3   | 121  |
| 36056 | necropsy | Mac_MARCO_4   | 1140 |
| 36056 | necropsy | Mac_TREM2     | 800  |
| 36056 | necropsy | Mac_TREM2_IFN | 23   |
| 36056 | necropsy | Mac_BIRC3     | 31   |
| 36056 | necropsy | pDC_1         | 21   |
| 36056 | necropsy | MAST_cells    | 62   |
| 36056 | necropsy | DC            | 311  |
| 36056 | necropsy | T_NK_1        | 2277 |
| 36056 | necropsy | T_NK_2        | 492  |
| 36056 | necropsy | B_cells       | 105  |
| 36056 | necropsy | 12            | 1209 |
| 36056 | necropsy | Prolif        | 163  |
| 36056 | necropsy | non_imm_1     | 15   |
| 36056 | necropsy | non_imm_2     | 6    |
| 36189 | w-1      | Mac_IFN       | 55   |
| 36189 | w-1      | Mac_IFN_2     | 5    |
| 36189 | w-1      | Mac_MARCO_1   | 12   |
| 36189 | w-1      | Mac_MARCO_2   | 2428 |
| 36189 | w-1      | Mac_MARCO_3   | 861  |
| 36189 | w-1      | Mac_MARCO_4   | 3    |
| 36189 | w-1      | Mac_TREM2     | 347  |
| 36189 | w-1      | Mac_TREM2_IFN | 8    |
| 36189 | w-1      | Mac_BIRC3     | 21   |
| 36189 | w-1      | pDC_1         | 33   |
| 36189 | w-1      | pDC_2         | 6    |
| 36189 | w-1      | MAST_cells    | 282  |
| 36189 | w-1      | DC            | 66   |
| 36189 | w-1      | T_NK_1        | 1656 |
| 36189 | w-1      | T_NK_2        | 372  |

|       |          |               |      |
|-------|----------|---------------|------|
| 36189 | w-1      | B_cells       | 276  |
| 36189 | w-1      | 12            | 56   |
| 36189 | w-1      | Prolif        | 63   |
| 36189 | w-1      | non_imm_1     | 43   |
| 36189 | w-1      | non_imm_2     | 12   |
| 36189 | d3       | Mac_IFN       | 3710 |
| 36189 | d3       | Mac_IFN_2     | 164  |
| 36189 | d3       | Mac_MARCO_1   | 31   |
| 36189 | d3       | Mac_MARCO_2   | 14   |
| 36189 | d3       | Mac_MARCO_3   | 14   |
| 36189 | d3       | Mac_MARCO_4   | 863  |
| 36189 | d3       | Mac_TREM2     | 118  |
| 36189 | d3       | Mac_TREM2_IFN | 413  |
| 36189 | d3       | Mac_BIRC3     | 21   |
| 36189 | d3       | pDC_1         | 14   |
| 36189 | d3       | pDC_2         | 25   |
| 36189 | d3       | MAST_cells    | 97   |
| 36189 | d3       | DC            | 217  |
| 36189 | d3       | T_NK_1        | 1720 |
| 36189 | d3       | T_NK_2        | 373  |
| 36189 | d3       | B_cells       | 76   |
| 36189 | d3       | 12            | 75   |
| 36189 | d3       | Prolif        | 73   |
| 36189 | d3       | non_imm_1     | 8    |
| 36189 | d3       | non_imm_2     | 4    |
| 36189 | necropsy | Mac_IFN       | 390  |
| 36189 | necropsy | Mac_MARCO_1   | 6100 |
| 36189 | necropsy | Mac_MARCO_2   | 1264 |
| 36189 | necropsy | Mac_MARCO_3   | 6    |
| 36189 | necropsy | Mac_MARCO_4   | 249  |
| 36189 | necropsy | Mac_TREM2     | 922  |
| 36189 | necropsy | Mac_TREM2_IFN | 158  |
| 36189 | necropsy | Mac_BIRC3     | 116  |
| 36189 | necropsy | pDC_1         | 136  |
| 36189 | necropsy | MAST_cells    | 283  |
| 36189 | necropsy | DC            | 218  |
| 36189 | necropsy | T_NK_1        | 750  |
| 36189 | necropsy | T_NK_2        | 180  |
| 36189 | necropsy | B_cells       | 218  |
| 36189 | necropsy | 12            | 162  |
| 36189 | necropsy | Prolif        | 198  |



|       |          |               |      |
|-------|----------|---------------|------|
| 36189 | necropsy | non_imm_1     | 3    |
| 36189 | necropsy | non_imm_2     | 1    |
| 36207 | w-1      | Mac_IFN       | 135  |
| 36207 | w-1      | Mac_IFN_2     | 4    |
| 36207 | w-1      | Mac_MARCO_1   | 103  |
| 36207 | w-1      | Mac_MARCO_2   | 2486 |
| 36207 | w-1      | Mac_MARCO_3   | 925  |
| 36207 | w-1      | Mac_MARCO_4   | 22   |
| 36207 | w-1      | Mac_TREM2     | 571  |
| 36207 | w-1      | Mac_TREM2_IFN | 6    |
| 36207 | w-1      | Mac_BIRC3     | 28   |
| 36207 | w-1      | pDC_1         | 7    |
| 36207 | w-1      | MAST_cells    | 32   |
| 36207 | w-1      | DC            | 45   |
| 36207 | w-1      | T_NK_1        | 785  |
| 36207 | w-1      | T_NK_2        | 195  |
| 36207 | w-1      | B_cells       | 172  |
| 36207 | w-1      | 12            | 46   |
| 36207 | w-1      | Prolif        | 65   |
| 36207 | w-1      | non_imm_1     | 193  |
| 36207 | w-1      | non_imm_2     | 48   |
| 36207 | d3       | Mac_IFN       | 4496 |
| 36207 | d3       | Mac_IFN_2     | 146  |
| 36207 | d3       | Mac_MARCO_1   | 20   |
| 36207 | d3       | Mac_MARCO_2   | 704  |
| 36207 | d3       | Mac_MARCO_3   | 48   |
| 36207 | d3       | Mac_MARCO_4   | 42   |
| 36207 | d3       | Mac_TREM2     | 205  |
| 36207 | d3       | Mac_TREM2_IFN | 443  |
| 36207 | d3       | Mac_BIRC3     | 294  |
| 36207 | d3       | pDC_1         | 567  |
| 36207 | d3       | MAST_cells    | 7    |
| 36207 | d3       | DC            | 47   |
| 36207 | d3       | T_NK_1        | 898  |
| 36207 | d3       | T_NK_2        | 273  |
| 36207 | d3       | B_cells       | 190  |
| 36207 | d3       | 12            | 103  |
| 36207 | d3       | Prolif        | 85   |
| 36207 | d3       | non_imm_1     | 160  |
| 36207 | d3       | non_imm_2     | 31   |
| 36207 | necropsy | Mac_IFN       | 31   |

|       |          |               |      |
|-------|----------|---------------|------|
| 36207 | necropsy | Mac_MARCO_1   | 2643 |
| 36207 | necropsy | Mac_MARCO_2   | 60   |
| 36207 | necropsy | Mac_MARCO_3   | 40   |
| 36207 | necropsy | Mac_MARCO_4   | 686  |
| 36207 | necropsy | Mac_TREM2     | 487  |
| 36207 | necropsy | Mac_TREM2_IFN | 10   |
| 36207 | necropsy | Mac_BIRC3     | 38   |
| 36207 | necropsy | pDC_1         | 17   |
| 36207 | necropsy | MAST_cells    | 18   |
| 36207 | necropsy | DC            | 152  |
| 36207 | necropsy | T_NK_1        | 2367 |
| 36207 | necropsy | T_NK_2        | 801  |
| 36207 | necropsy | B_cells       | 271  |
| 36207 | necropsy | 12            | 18   |
| 36207 | necropsy | Prolif        | 78   |
| 36207 | necropsy | non_imm_1     | 3    |

**Supplementary table 4: Number of cells analyzed for myeloid clusters.**

| Cluster_new       | Cells_count |
|-------------------|-------------|
| Mac_IFN_1         | 31190       |
| Mac_IFN_2         | 1706        |
| Mac_TREM2_IFN     | 4463        |
| Mac_S100A8        | 15225       |
| Mac_FOS           | 15070       |
| Mac_TREM2         | 8471        |
| Mac               | 18196       |
| Mac_2             | 4708        |
| Mac_3             | 2893        |
| Mac_dead          | 3300        |
| pDC               | 6720        |
| cDC2_and_doubl    | 2806        |
| cDC1_and_BIRC3    | 2040        |
| Mast_1            | 3152        |
| Mast_2            | 573         |
| Mac_T_doublet     | 6764        |
| Mac_IFN_T_doublet | 2003        |

**Supplementary table 5: Number of cells analyzed for myeloid clusters across the sampled timepoints.**

| Animal | Condition | Cluster_new | Cells_count |
|--------|-----------|-------------|-------------|
| 35951  | d3        | Mac_IFN_1   | 2781        |
| 35951  | d3        | Mac_IFN_2   | 9           |

|       |          |                   |      |
|-------|----------|-------------------|------|
| 35951 | d3       | Mac_TREM2_IFN     | 328  |
| 35951 | d3       | Mac_S100A8        | 4    |
| 35951 | d3       | Mac_TREM2         | 11   |
| 35951 | d3       | Mac               | 8    |
| 35951 | d3       | Mac_2             | 1    |
| 35951 | d3       | Mac_3             | 50   |
| 35951 | d3       | Mac_dead          | 201  |
| 35951 | d3       | pDC               | 9    |
| 35951 | d3       | cDC2_and_doubl    | 167  |
| 35951 | d3       | cDC1_and_BIRC3    | 48   |
| 35951 | d3       | Mast_1            | 20   |
| 35951 | d3       | Mast_2            | 429  |
| 35951 | d3       | Mac_T_doublet     | 35   |
| 35951 | d3       | Mac_IFN_T_doublet | 105  |
| 35951 | necropsy | Mac_TREM2_IFN     | 46   |
| 35951 | necropsy | Mac_S100A8        | 650  |
| 35951 | necropsy | Mac_FOS           | 1    |
| 35951 | necropsy | Mac_TREM2         | 276  |
| 35951 | necropsy | Mac               | 848  |
| 35951 | necropsy | Mac_2             | 208  |
| 35951 | necropsy | Mac_3             | 60   |
| 35951 | necropsy | Mac_dead          | 61   |
| 35951 | necropsy | pDC               | 101  |
| 35951 | necropsy | cDC2_and_doubl    | 55   |
| 35951 | necropsy | cDC1_and_BIRC3    | 75   |
| 35951 | necropsy | Mast_1            | 577  |
| 35951 | necropsy | Mac_T_doublet     | 98   |
| 35951 | w-1      | Mac_IFN_1         | 7    |
| 35951 | w-1      | Mac_IFN_2         | 66   |
| 35951 | w-1      | Mac_TREM2_IFN     | 41   |
| 35951 | w-1      | Mac_S100A8        | 379  |
| 35951 | w-1      | Mac_FOS           | 1871 |
| 35951 | w-1      | Mac_TREM2         | 466  |
| 35951 | w-1      | Mac               | 620  |
| 35951 | w-1      | Mac_2             | 176  |
| 35951 | w-1      | Mac_3             | 65   |
| 35951 | w-1      | Mac_dead          | 86   |
| 35951 | w-1      | pDC               | 143  |
| 35951 | w-1      | cDC2_and_doubl    | 43   |
| 35951 | w-1      | cDC1_and_BIRC3    | 31   |
| 35951 | w-1      | Mast_1            | 561  |

|       |          |                   |      |
|-------|----------|-------------------|------|
| 35951 | w-1      | Mac_T_doublet     | 175  |
| 35969 | d3       | Mac_IFN_1         | 6113 |
| 35969 | d3       | Mac_IFN_2         | 255  |
| 35969 | d3       | Mac_TREM2_IFN     | 171  |
| 35969 | d3       | Mac_S100A8        | 107  |
| 35969 | d3       | Mac_FOS           | 175  |
| 35969 | d3       | Mac_TREM2         | 182  |
| 35969 | d3       | Mac               | 547  |
| 35969 | d3       | Mac_2             | 132  |
| 35969 | d3       | Mac_3             | 47   |
| 35969 | d3       | Mac_dead          | 324  |
| 35969 | d3       | pDC               | 169  |
| 35969 | d3       | cDC2_and_doubl    | 41   |
| 35969 | d3       | cDC1_and_BIRC3    | 18   |
| 35969 | d3       | Mast_1            | 32   |
| 35969 | d3       | Mac_T_doublet     | 77   |
| 35969 | d3       | Mac_IFN_T_doublet | 160  |
| 35969 | necropsy | Mac_IFN_1         | 39   |
| 35969 | necropsy | Mac_TREM2_IFN     | 28   |
| 35969 | necropsy | Mac_S100A8        | 1864 |
| 35969 | necropsy | Mac_FOS           | 26   |
| 35969 | necropsy | Mac_TREM2         | 587  |
| 35969 | necropsy | Mac               | 1788 |
| 35969 | necropsy | Mac_2             | 484  |
| 35969 | necropsy | Mac_3             | 38   |
| 35969 | necropsy | Mac_dead          | 124  |
| 35969 | necropsy | pDC               | 85   |
| 35969 | necropsy | cDC2_and_doubl    | 222  |
| 35969 | necropsy | cDC1_and_BIRC3    | 55   |
| 35969 | necropsy | Mast_1            | 149  |
| 35969 | necropsy | Mac_T_doublet     | 261  |
| 35969 | necropsy | Mac_IFN_T_doublet | 2    |
| 35969 | w-1      | Mac_IFN_1         | 251  |
| 35969 | w-1      | Mac_IFN_2         | 7    |
| 35969 | w-1      | Mac_TREM2_IFN     | 240  |
| 35969 | w-1      | Mac_S100A8        | 965  |
| 35969 | w-1      | Mac_FOS           | 2562 |
| 35969 | w-1      | Mac_TREM2         | 581  |
| 35969 | w-1      | Mac               | 1338 |
| 35969 | w-1      | Mac_2             | 333  |
| 35969 | w-1      | Mac_3             | 370  |

|       |          |                   |       |
|-------|----------|-------------------|-------|
| 35969 | w-1      | Mac_dead          | 122   |
| 35969 | w-1      | pDC               | 516   |
| 35969 | w-1      | cDC2_and_doubl    | 127   |
| 35969 | w-1      | cDC1_and_BIRC3    | 56    |
| 35969 | w-1      | Mast_1            | 125   |
| 35969 | w-1      | Mac_T_doublet     | 436   |
| 35969 | w-1      | Mac_IFN_T_doublet | 12    |
| 36052 | d3       | Mac_IFN_1         | 10622 |
| 36052 | d3       | Mac_IFN_2         | 234   |
| 36052 | d3       | Mac_TREM2_IFN     | 640   |
| 36052 | d3       | Mac_S100A8        | 1     |
| 36052 | d3       | Mac_TREM2         | 33    |
| 36052 | d3       | Mac               | 10    |
| 36052 | d3       | Mac_3             | 7     |
| 36052 | d3       | Mac_dead          | 611   |
| 36052 | d3       | pDC               | 104   |
| 36052 | d3       | cDC2_and_doubl    | 179   |
| 36052 | d3       | cDC1_and_BIRC3    | 54    |
| 36052 | d3       | Mast_1            | 15    |
| 36052 | d3       | Mast_2            | 138   |
| 36052 | d3       | Mac_T_doublet     | 176   |
| 36052 | d3       | Mac_IFN_T_doublet | 1031  |
| 36052 | necropsy | Mac_IFN_1         | 3     |
| 36052 | necropsy | Mac_IFN_2         | 2     |
| 36052 | necropsy | Mac_TREM2_IFN     | 135   |
| 36052 | necropsy | Mac_S100A8        | 3008  |
| 36052 | necropsy | Mac_FOS           | 259   |
| 36052 | necropsy | Mac_TREM2         | 1021  |
| 36052 | necropsy | Mac               | 3692  |
| 36052 | necropsy | Mac_2             | 742   |
| 36052 | necropsy | Mac_3             | 81    |
| 36052 | necropsy | Mac_dead          | 343   |
| 36052 | necropsy | pDC               | 223   |
| 36052 | necropsy | cDC2_and_doubl    | 356   |
| 36052 | necropsy | cDC1_and_BIRC3    | 174   |
| 36052 | necropsy | Mast_1            | 254   |
| 36052 | necropsy | Mac_T_doublet     | 1646  |
| 36052 | necropsy | Mac_IFN_T_doublet | 7     |
| 36052 | w-1      | Mac_IFN_2         | 20    |
| 36052 | w-1      | Mac_TREM2_IFN     | 112   |
| 36052 | w-1      | Mac_S100A8        | 460   |

|       |          |                   |      |
|-------|----------|-------------------|------|
| 36052 | w-1      | Mac_FOS           | 3350 |
| 36052 | w-1      | Mac_TREM2         | 293  |
| 36052 | w-1      | Mac               | 470  |
| 36052 | w-1      | Mac_2             | 140  |
| 36052 | w-1      | Mac_3             | 325  |
| 36052 | w-1      | Mac_dead          | 131  |
| 36052 | w-1      | pDC               | 189  |
| 36052 | w-1      | cDC2_and_doubl    | 115  |
| 36052 | w-1      | cDC1_and_BIRC3    | 61   |
| 36052 | w-1      | Mast_1            | 146  |
| 36052 | w-1      | Mac_T_doublet     | 706  |
| 36052 | w-1      | Mac_IFN_T_doublet | 4    |
| 36056 | d3       | Mac_IFN_1         | 1353 |
| 36056 | d3       | Mac_IFN_2         | 5    |
| 36056 | d3       | Mac_TREM2_IFN     | 1749 |
| 36056 | d3       | Mac_S100A8        | 18   |
| 36056 | d3       | Mac_FOS           | 1    |
| 36056 | d3       | Mac_TREM2         | 64   |
| 36056 | d3       | Mac               | 8    |
| 36056 | d3       | Mac_2             | 2    |
| 36056 | d3       | Mac_3             | 58   |
| 36056 | d3       | Mac_dead          | 95   |
| 36056 | d3       | pDC               | 4112 |
| 36056 | d3       | cDC2_and_doubl    | 104  |
| 36056 | d3       | cDC1_and_BIRC3    | 595  |
| 36056 | d3       | Mast_1            | 19   |
| 36056 | d3       | Mast_2            | 6    |
| 36056 | d3       | Mac_T_doublet     | 26   |
| 36056 | d3       | Mac_IFN_T_doublet | 181  |
| 36056 | necropsy | Mac_IFN_1         | 905  |
| 36056 | necropsy | Mac_IFN_2         | 1    |
| 36056 | necropsy | Mac_TREM2_IFN     | 17   |
| 36056 | necropsy | Mac_S100A8        | 3502 |
| 36056 | necropsy | Mac_FOS           | 13   |
| 36056 | necropsy | Mac_TREM2         | 1362 |
| 36056 | necropsy | Mac               | 1571 |
| 36056 | necropsy | Mac_2             | 103  |
| 36056 | necropsy | Mac_3             | 1135 |
| 36056 | necropsy | Mac_dead          | 198  |
| 36056 | necropsy | pDC               | 21   |
| 36056 | necropsy | cDC2_and_doubl    | 305  |

|       |          |                   |      |
|-------|----------|-------------------|------|
| 36056 | necropsy | cDC1_and_BIRC3    | 70   |
| 36056 | necropsy | Mast_1            | 62   |
| 36056 | necropsy | Mac_T_doublet     | 1056 |
| 36056 | necropsy | Mac_IFN_T_doublet | 42   |
| 36056 | w-1      | Mac_IFN_1         | 109  |
| 36056 | w-1      | Mac_IFN_2         | 939  |
| 36056 | w-1      | Mac_TREM2_IFN     | 15   |
| 36056 | w-1      | Mac_S100A8        | 26   |
| 36056 | w-1      | Mac_FOS           | 2932 |
| 36056 | w-1      | Mac_TREM2         | 802  |
| 36056 | w-1      | Mac               | 1468 |
| 36056 | w-1      | Mac_2             | 384  |
| 36056 | w-1      | Mac_3             | 28   |
| 36056 | w-1      | Mac_dead          | 88   |
| 36056 | w-1      | pDC               | 47   |
| 36056 | w-1      | cDC2_and_doubl    | 293  |
| 36056 | w-1      | cDC1_and_BIRC3    | 118  |
| 36056 | w-1      | Mast_1            | 254  |
| 36056 | w-1      | Mac_T_doublet     | 663  |
| 36056 | w-1      | Mac_IFN_T_doublet | 2    |
| 36189 | d3       | Mac_IFN_1         | 4015 |
| 36189 | d3       | Mac_IFN_2         | 8    |
| 36189 | d3       | Mac_TREM2_IFN     | 391  |
| 36189 | d3       | Mac_S100A8        | 108  |
| 36189 | d3       | Mac_FOS           | 1    |
| 36189 | d3       | Mac_TREM2         | 178  |
| 36189 | d3       | Mac               | 3    |
| 36189 | d3       | Mac_2             | 27   |
| 36189 | d3       | Mac_3             | 52   |
| 36189 | d3       | Mac_dead          | 344  |
| 36189 | d3       | pDC               | 48   |
| 36189 | d3       | cDC2_and_doubl    | 190  |
| 36189 | d3       | cDC1_and_BIRC3    | 64   |
| 36189 | d3       | Mast_1            | 97   |
| 36189 | d3       | Mac_T_doublet     | 18   |
| 36189 | d3       | Mac_IFN_T_doublet | 232  |
| 36189 | necropsy | Mac_IFN_1         | 63   |
| 36189 | necropsy | Mac_IFN_2         | 1    |
| 36189 | necropsy | Mac_TREM2_IFN     | 89   |
| 36189 | necropsy | Mac_S100A8        | 2469 |
| 36189 | necropsy | Mac_FOS           | 37   |

|       |          |                   |      |
|-------|----------|-------------------|------|
| 36189 | necropsy | Mac_TREM2         | 981  |
| 36189 | necropsy | Mac               | 3490 |
| 36189 | necropsy | Mac_2             | 969  |
| 36189 | necropsy | Mac_3             | 73   |
| 36189 | necropsy | Mac_dead          | 227  |
| 36189 | necropsy | pDC               | 252  |
| 36189 | necropsy | cDC2_and_doubl    | 243  |
| 36189 | necropsy | cDC1_and_BIRC3    | 177  |
| 36189 | necropsy | Mast_1            | 250  |
| 36189 | necropsy | Mac_T_doublet     | 679  |
| 36189 | necropsy | Mac_IFN_T_doublet | 4    |
| 36189 | w-1      | Mac_IFN_1         | 42   |
| 36189 | w-1      | Mac_IFN_2         | 76   |
| 36189 | w-1      | Mac_TREM2_IFN     | 5    |
| 36189 | w-1      | Mac_S100A8        | 143  |
| 36189 | w-1      | Mac_FOS           | 2162 |
| 36189 | w-1      | Mac_TREM2         | 332  |
| 36189 | w-1      | Mac               | 118  |
| 36189 | w-1      | Mac_2             | 290  |
| 36189 | w-1      | Mac_3             | 235  |
| 36189 | w-1      | Mac_dead          | 52   |
| 36189 | w-1      | pDC               | 137  |
| 36189 | w-1      | cDC2_and_doubl    | 72   |
| 36189 | w-1      | cDC1_and_BIRC3    | 40   |
| 36189 | w-1      | Mast_1            | 282  |
| 36189 | w-1      | Mac_T_doublet     | 196  |
| 36189 | w-1      | Mac_IFN_T_doublet | 1    |
| 36207 | d3       | Mac_IFN_1         | 4697 |
| 36207 | d3       | Mac_IFN_2         | 63   |
| 36207 | d3       | Mac_TREM2_IFN     | 439  |
| 36207 | d3       | Mac_S100A8        | 47   |
| 36207 | d3       | Mac_FOS           | 20   |
| 36207 | d3       | Mac_TREM2         | 187  |
| 36207 | d3       | Mac               | 213  |
| 36207 | d3       | Mac_2             | 38   |
| 36207 | d3       | Mac_3             | 65   |
| 36207 | d3       | Mac_dead          | 185  |
| 36207 | d3       | pDC               | 538  |
| 36207 | d3       | cDC2_and_doubl    | 45   |
| 36207 | d3       | cDC1_and_BIRC3    | 304  |
| 36207 | d3       | Mast_1            | 15   |



|       |          |                   |      |
|-------|----------|-------------------|------|
| 36207 | d3       | Mac_T_doublet     | 48   |
| 36207 | d3       | Mac_IFN_T_doublet | 218  |
| 36207 | necropsy | Mac_IFN_1         | 47   |
| 36207 | necropsy | Mac_IFN_2         | 2    |
| 36207 | necropsy | Mac_TREM2_IFN     | 11   |
| 36207 | necropsy | Mac_S100A8        | 1081 |
| 36207 | necropsy | Mac_FOS           | 54   |
| 36207 | necropsy | Mac_TREM2         | 568  |
| 36207 | necropsy | Mac               | 1382 |
| 36207 | necropsy | Mac_2             | 271  |
| 36207 | necropsy | Mac_3             | 21   |
| 36207 | necropsy | Mac_dead          | 61   |
| 36207 | necropsy | pDC               | 17   |
| 36207 | necropsy | cDC2_and_doubl    | 191  |
| 36207 | necropsy | cDC1_and_BIRC3    | 60   |
| 36207 | necropsy | Mast_1            | 80   |
| 36207 | necropsy | Mac_T_doublet     | 353  |
| 36207 | necropsy | Mac_IFN_T_doublet | 1    |
| 36207 | w-1      | Mac_IFN_1         | 143  |
| 36207 | w-1      | Mac_IFN_2         | 18   |
| 36207 | w-1      | Mac_TREM2_IFN     | 6    |
| 36207 | w-1      | Mac_S100A8        | 393  |
| 36207 | w-1      | Mac_FOS           | 1606 |
| 36207 | w-1      | Mac_TREM2         | 547  |
| 36207 | w-1      | Mac               | 622  |
| 36207 | w-1      | Mac_2             | 408  |
| 36207 | w-1      | Mac_3             | 183  |
| 36207 | w-1      | Mac_dead          | 47   |
| 36207 | w-1      | pDC               | 9    |
| 36207 | w-1      | cDC2_and_doubl    | 58   |
| 36207 | w-1      | cDC1_and_BIRC3    | 40   |
| 36207 | w-1      | Mast_1            | 214  |
| 36207 | w-1      | Mac_T_doublet     | 115  |
| 36207 | w-1      | Mac_IFN_T_doublet | 1    |

**Supplementary table 6: Number of cells analyzed for lymphoid clusters.**

| Cluster_new | Cells_count |
|-------------|-------------|
| T_1         | 8331        |
| T_2         | 6733        |
| T_3         | 4914        |
| T_4         | 4206        |

|             |      |
|-------------|------|
| T_5         | 753  |
| T_IFN       | 2682 |
| NK_Tgd      | 5203 |
| Treg        | 412  |
| B_cells_1   | 2823 |
| B_cells_2   | 142  |
| B_cells_3   | 107  |
| T_doublet_1 | 1493 |
| T_doublet_2 | 361  |

**Supplementary table 7: Number of cells analyzed for lymphoid clusters across the sampled timepoints.**

| Animal | Condition | Cluster_new | Cells_count |
|--------|-----------|-------------|-------------|
| 35951  | d3        | T_1         | 2           |
| 35951  | d3        | T_2         | 8           |
| 35951  | d3        | T_3         | 2           |
| 35951  | d3        | T_4         | 536         |
| 35951  | d3        | T_5         | 4           |
| 35951  | d3        | T_IFN       | 94          |
| 35951  | d3        | NK_Tgd      | 78          |
| 35951  | d3        | Treg        | 1           |
| 35951  | d3        | B_cells_1   | 8           |
| 35951  | d3        | B_cells_2   | 1           |
| 35951  | d3        | B_cells_3   | 29          |
| 35951  | d3        | T_doublet_1 | 86          |
| 35951  | d3        | T_doublet_2 | 1           |
| 35951  | necropsy  | T_1         | 145         |
| 35951  | necropsy  | T_2         | 531         |
| 35951  | necropsy  | T_3         | 481         |
| 35951  | necropsy  | T_4         | 5           |
| 35951  | necropsy  | T_IFN       | 61          |
| 35951  | necropsy  | NK_Tgd      | 522         |
| 35951  | necropsy  | Treg        | 27          |
| 35951  | necropsy  | B_cells_1   | 339         |
| 35951  | necropsy  | B_cells_2   | 3           |
| 35951  | necropsy  | T_doublet_1 | 58          |
| 35951  | necropsy  | T_doublet_2 | 5           |
| 35951  | w-1       | T_1         | 829         |
| 35951  | w-1       | T_2         | 72          |
| 35951  | w-1       | T_3         | 206         |
| 35951  | w-1       | T_4         | 1           |

|       |          |             |     |
|-------|----------|-------------|-----|
| 35951 | w-1      | T_IFN       | 29  |
| 35951 | w-1      | NK_Tgd      | 108 |
| 35951 | w-1      | Treg        | 23  |
| 35951 | w-1      | B_cells_1   | 37  |
| 35951 | w-1      | T_doublet_1 | 136 |
| 35951 | w-1      | T_doublet_2 | 38  |
| 35969 | d3       | T_1         | 392 |
| 35969 | d3       | T_2         | 3   |
| 35969 | d3       | T_3         | 23  |
| 35969 | d3       | T_4         | 34  |
| 35969 | d3       | T_5         | 1   |
| 35969 | d3       | T_IFN       | 105 |
| 35969 | d3       | NK_Tgd      | 37  |
| 35969 | d3       | Treg        | 7   |
| 35969 | d3       | B_cells_1   | 68  |
| 35969 | d3       | B_cells_2   | 3   |
| 35969 | d3       | T_doublet_1 | 91  |
| 35969 | necropsy | T_1         | 24  |
| 35969 | necropsy | T_2         | 777 |
| 35969 | necropsy | T_3         | 446 |
| 35969 | necropsy | T_4         | 200 |
| 35969 | necropsy | T_5         | 49  |
| 35969 | necropsy | T_IFN       | 31  |
| 35969 | necropsy | NK_Tgd      | 161 |
| 35969 | necropsy | Treg        | 26  |
| 35969 | necropsy | B_cells_1   | 85  |
| 35969 | necropsy | B_cells_2   | 2   |
| 35969 | necropsy | T_doublet_1 | 108 |
| 35969 | necropsy | T_doublet_2 | 2   |
| 35969 | w-1      | T_1         | 927 |
| 35969 | w-1      | T_2         | 140 |
| 35969 | w-1      | T_3         | 161 |
| 35969 | w-1      | T_4         | 187 |
| 35969 | w-1      | T_5         | 34  |
| 35969 | w-1      | T_IFN       | 59  |
| 35969 | w-1      | NK_Tgd      | 138 |
| 35969 | w-1      | Treg        | 19  |
| 35969 | w-1      | B_cells_1   | 64  |
| 35969 | w-1      | B_cells_2   | 10  |
| 35969 | w-1      | T_doublet_1 | 105 |
| 35969 | w-1      | T_doublet_2 | 1   |

|       |          |             |      |
|-------|----------|-------------|------|
| 36052 | d3       | T_1         | 16   |
| 36052 | d3       | T_2         | 31   |
| 36052 | d3       | T_3         | 29   |
| 36052 | d3       | T_4         | 1481 |
| 36052 | d3       | T_5         | 274  |
| 36052 | d3       | T_IFN       | 203  |
| 36052 | d3       | NK_Tgd      | 226  |
| 36052 | d3       | Treg        | 1    |
| 36052 | d3       | B_cells_1   | 7    |
| 36052 | d3       | B_cells_2   | 4    |
| 36052 | d3       | B_cells_3   | 78   |
| 36052 | d3       | T_doublet_1 | 30   |
| 36052 | d3       | T_doublet_2 | 6    |
| 36052 | necropsy | T_1         | 47   |
| 36052 | necropsy | T_2         | 950  |
| 36052 | necropsy | T_3         | 421  |
| 36052 | necropsy | T_5         | 2    |
| 36052 | necropsy | T_IFN       | 81   |
| 36052 | necropsy | NK_Tgd      | 464  |
| 36052 | necropsy | Treg        | 46   |
| 36052 | necropsy | B_cells_1   | 352  |
| 36052 | necropsy | B_cells_2   | 17   |
| 36052 | necropsy | T_doublet_1 | 204  |
| 36052 | necropsy | T_doublet_2 | 7    |
| 36052 | w-1      | T_1         | 1944 |
| 36052 | w-1      | T_2         | 581  |
| 36052 | w-1      | T_3         | 559  |
| 36052 | w-1      | T_5         | 1    |
| 36052 | w-1      | T_IFN       | 85   |
| 36052 | w-1      | NK_Tgd      | 299  |
| 36052 | w-1      | Treg        | 26   |
| 36052 | w-1      | B_cells_1   | 135  |
| 36052 | w-1      | B_cells_2   | 2    |
| 36052 | w-1      | T_doublet_1 | 55   |
| 36052 | w-1      | T_doublet_2 | 95   |
| 36056 | d3       | T_1         | 158  |
| 36056 | d3       | T_2         | 107  |
| 36056 | d3       | T_3         | 149  |
| 36056 | d3       | T_4         | 207  |
| 36056 | d3       | T_5         | 8    |
| 36056 | d3       | T_IFN       | 1039 |

|       |          |             |      |
|-------|----------|-------------|------|
| 36056 | d3       | NK_Tgd      | 498  |
| 36056 | d3       | Treg        | 11   |
| 36056 | d3       | B_cells_1   | 342  |
| 36056 | d3       | B_cells_2   | 62   |
| 36056 | d3       | T_doublet_1 | 36   |
| 36056 | d3       | T_doublet_2 | 12   |
| 36056 | necropsy | T_1         | 285  |
| 36056 | necropsy | T_2         | 445  |
| 36056 | necropsy | T_3         | 807  |
| 36056 | necropsy | T_4         | 503  |
| 36056 | necropsy | T_5         | 157  |
| 36056 | necropsy | T_IFN       | 8    |
| 36056 | necropsy | NK_Tgd      | 356  |
| 36056 | necropsy | Treg        | 24   |
| 36056 | necropsy | B_cells_1   | 82   |
| 36056 | necropsy | B_cells_2   | 4    |
| 36056 | necropsy | T_doublet_1 | 167  |
| 36056 | necropsy | T_doublet_2 | 63   |
| 36056 | w-1      | T_1         | 1269 |
| 36056 | w-1      | T_2         | 542  |
| 36056 | w-1      | T_3         | 222  |
| 36056 | w-1      | T_4         | 4    |
| 36056 | w-1      | T_5         | 1    |
| 36056 | w-1      | T_IFN       | 53   |
| 36056 | w-1      | NK_Tgd      | 521  |
| 36056 | w-1      | Treg        | 35   |
| 36056 | w-1      | B_cells_1   | 190  |
| 36056 | w-1      | B_cells_2   | 6    |
| 36056 | w-1      | T_doublet_1 | 47   |
| 36056 | w-1      | T_doublet_2 | 70   |
| 36189 | d3       | T_1         | 105  |
| 36189 | d3       | T_2         | 623  |
| 36189 | d3       | T_3         | 438  |
| 36189 | d3       | T_4         | 264  |
| 36189 | d3       | T_5         | 41   |
| 36189 | d3       | T_IFN       | 283  |
| 36189 | d3       | NK_Tgd      | 309  |
| 36189 | d3       | Treg        | 18   |
| 36189 | d3       | B_cells_1   | 71   |
| 36189 | d3       | B_cells_2   | 1    |
| 36189 | d3       | T_doublet_1 | 44   |

|       |          |             |      |
|-------|----------|-------------|------|
| 36189 | d3       | T_doublet_2 | 1    |
| 36189 | necropsy | T_1         | 96   |
| 36189 | necropsy | T_2         | 371  |
| 36189 | necropsy | T_3         | 96   |
| 36189 | necropsy | T_4         | 116  |
| 36189 | necropsy | T_5         | 31   |
| 36189 | necropsy | T_IFN       | 24   |
| 36189 | necropsy | NK_Tgd      | 150  |
| 36189 | necropsy | Treg        | 37   |
| 36189 | necropsy | B_cells_1   | 183  |
| 36189 | necropsy | B_cells_2   | 11   |
| 36189 | necropsy | T_doublet_1 | 59   |
| 36189 | necropsy | T_doublet_2 | 21   |
| 36189 | w-1      | T_1         | 1044 |
| 36189 | w-1      | T_2         | 177  |
| 36189 | w-1      | T_3         | 250  |
| 36189 | w-1      | T_4         | 103  |
| 36189 | w-1      | T_5         | 27   |
| 36189 | w-1      | T_IFN       | 10   |
| 36189 | w-1      | NK_Tgd      | 362  |
| 36189 | w-1      | Treg        | 43   |
| 36189 | w-1      | B_cells_1   | 257  |
| 36189 | w-1      | B_cells_2   | 5    |
| 36189 | w-1      | T_doublet_1 | 31   |
| 36189 | w-1      | T_doublet_2 | 37   |
| 36207 | d3       | T_1         | 375  |
| 36207 | d3       | T_2         | 8    |
| 36207 | d3       | T_3         | 27   |
| 36207 | d3       | T_4         | 66   |
| 36207 | d3       | T_5         | 2    |
| 36207 | d3       | T_IFN       | 493  |
| 36207 | d3       | NK_Tgd      | 125  |
| 36207 | d3       | Treg        | 13   |
| 36207 | d3       | B_cells_1   | 176  |
| 36207 | d3       | B_cells_2   | 6    |
| 36207 | d3       | T_doublet_1 | 126  |
| 36207 | necropsy | T_1         | 29   |
| 36207 | necropsy | T_2         | 1325 |
| 36207 | necropsy | T_3         | 546  |
| 36207 | necropsy | T_4         | 467  |
| 36207 | necropsy | T_5         | 117  |

|       |          |             |     |
|-------|----------|-------------|-----|
| 36207 | necropsy | T_IFN       | 15  |
| 36207 | necropsy | NK_Tgd      | 684 |
| 36207 | necropsy | Treg        | 43  |
| 36207 | necropsy | B_cells_1   | 268 |
| 36207 | necropsy | B_cells_2   | 5   |
| 36207 | necropsy | T_doublet_1 | 44  |
| 36207 | necropsy | T_doublet_2 | 1   |
| 36207 | w-1      | T_1         | 644 |
| 36207 | w-1      | T_2         | 42  |
| 36207 | w-1      | T_3         | 51  |
| 36207 | w-1      | T_4         | 32  |
| 36207 | w-1      | T_5         | 4   |
| 36207 | w-1      | T_IFN       | 9   |
| 36207 | w-1      | NK_Tgd      | 165 |
| 36207 | w-1      | Treg        | 12  |
| 36207 | w-1      | B_cells_1   | 159 |
| 36207 | w-1      | T_doublet_1 | 66  |
| 36207 | w-1      | T_doublet_2 | 1   |

**Supplementary table 8: Details of antibodies.**

| <b>Antibody</b>                 | <b>Dilution</b> | <b>Supplier</b>          | <b>Catalogue Number</b> | <b>Clone</b> | <b>Validation Statement: Reactivity</b>                     |
|---------------------------------|-----------------|--------------------------|-------------------------|--------------|-------------------------------------------------------------|
| ACE-2                           | 1: 50           | R & D Systems            | AF933                   | Polyclonal   | Human, Mouse, Rat, Hamster, in-house validation for NHPs    |
| MX-1                            | 1: 200          | Thermo Fisher Scientific | PA5-22101               | Polyclonal   | Bovine, Human, Non-human primate, Rabbit                    |
| MX-2                            | 1: 100          | Millipore Sigma          | HPA030235               | Polyclonal   | Human, in-house validation for NHPs                         |
| ISG-15                          | 1: 100          | Thermo Fisher Scientific | PA5-31865               | Polyclonal   | Human, Rat, in-house validation for NHPs                    |
| Siglec-1                        | 1: 40           | Novus Biologicals        | NB600-534               | HSn 7D2      | Human, Mouse, Porcine, in-house validation for NHPs         |
| SARS CoV2-Nucleocapsid          | 1: 100          | Sino Biological          | 40588-T62               | Polyclonal   | SARS-CoV-2 Coronavirus Nucleocapsid                         |
| IFN- $\alpha$ (FITC Conjugated) | 1: 10           | PBL Assay Science        | 21112-3                 | MMHA-11      | Human, in-house validation for NHPs                         |
| CD68                            | 1: 40           | Thermo Fisher Scientific | MA5-13324               | KP1          | Hamster, Human, Mouse, Pig, Rabbit, Rat, Rhesus monkey, Rat |

|                                           |        |                          |           |            |                                                |
|-------------------------------------------|--------|--------------------------|-----------|------------|------------------------------------------------|
| HLA-DR                                    | 1: 40  | Thermo Fisher Scientific | MA5-11966 | LN3        | Human, Mouse, Non-human primate, Rhesus monkey |
| CD123                                     | 1: 100 | Thermo Fisher Scientific | PA5-85146 | Polyclonal | Human, in-house validation for NHPs            |
| CD3                                       | 1: 80  | Agilent Technologies     | A045201-2 | Polyclonal | in-house validation for NHPs                   |
| C1q (FITC Conjugated)                     | 1: 10  | Abcam                    | ab4233    | Polyclonal | Human, in-house validation for NHPs            |
| <b>Secondary antibodies</b>               |        |                          |           |            |                                                |
| Goat anti Mouse IgG, Alexa Fluor 647      | 1: 400 | Thermo Fisher Scientific | A21236    |            | Validated by manufacturer                      |
| Donkey anti Goat IgG, Alexa Fluor 555     | 1: 400 | Thermo Fisher Scientific | A21432    |            | Validated by manufacturer                      |
| Goat anti Mouse IgG, Alexa Fluor 555      | 1: 400 | Thermo Fisher Scientific | A21422    |            | Validated by manufacturer                      |
| Goat anti-rabbit IgG, Alexa Fluor 488     | 1: 400 | Thermo Fisher Scientific | A11008    |            | Validated by manufacturer                      |
| Goat anti-Mouse IgG, Alexa Fluor Plus 488 | 1: 400 | Thermo Fisher Scientific | A32723    |            | Validated by manufacturer                      |
