# Supplementary material for: Myeloid cell interferon responses correlate with clearance of SARS-CoV-2
Source: PubMed Central journal article supplement (PMC8814034; doi:10.1038/s41467-022-28315-7), 2022-02-03
Supplement: 41467_2022_28315_MOESM3_ESM.pdf [file 41467_2022_28315_MOESM3_ESM.pdf]

## **Description of Additional Supplementary Files**

File Name: Supplementary Data 1

Description: List of significantly perturbed genes across pan-CD45 clusters. Markers for each cluster were identified using Wilcoxon rank sum test and p-values were adjusted based using Bonferroni correction. No rounding operators were applied. Exact p-values and adjusted p-values are provided.

File Name: Supplementary Data 2

Description: List of significantly perturbed genes and their abundance across myeloid clusters. Markers for each cluster were identified using Wilcoxon rank sum test and p-values were adjusted based using Bonferroni correction. No rounding operators were applied. Exact p-values and adjusted p-values are provided.

File Name: Supplementary Data 3

Description: List of significantly perturbed genes and their abundance across lymphoid clusters. Markers for each cluster were identified using Wilcoxon rank sum test and p-values were adjusted based using Bonferroni correction. No rounding operators were applied. Exact p-values and adjusted p-values are provided.
