# Supplementary material for: Myeloid cell interferon responses correlate with clearance of SARS-CoV-2
Source: PubMed Central journal article supplement (PMC8814034; doi:10.1038/s41467-022-28315-7), 2022-02-03
Supplement: 41467_2022_28315_MOESM7_ESM.pdf [file 41467_2022_28315_MOESM7_ESM.pdf]

The full content of this file cannot be displayed with your current PDF viewer. Please update to the latest possible version to view this document.
